# Supplementary material for: Re-annotation of eight Drosophila genomes
Source: Life Sci Alliance. 2018 Dec 24;1(6):e201800156. doi: 10.26508/lsa.201800156 (PMC6305970; doi:10.26508/lsa.201800156)
Supplement: Supplementary file 1 [file LSA-2018-00156_TableS1.xlsx]

## Sheet: Sheet1
Reagent type (species)	Designation	Source or reference	Identifiers	Additional information
Reagent type. Duplicate rows as needed. Order is flexible, but row titles must be preserved. Species (mandatory if applicable). Append in parentheses. First mention, use full genus. Sex (if applicable). Add within parentheses after species.	Designation. Symbol/name used in publication. Separate multiple entries with semi-colon, space. (If semi-colon within designation, delimit wtith double quotes.)	Source (public). Stock center, company, data repository. Reference. Include PMID or DOI; use “This paper” if new. If neither applies enter “other” and explain in Additional Information.	Identifiers. Format as ID_source:identifier. Separate multiple entries with semi-colon, space. Include catalog numbers, stock numbers, database IDs or accession numbers, RRIDs.	Additional information. Mandatory if column C entry is “this paper” or “other”. Description of new reagent; laboratory from which reagent obtained; other pertinent information. For antibodies, indicate dilution and conditions used.
gene (Drosophila ananassae)	YOgnAN10714	This paper	dana.YO.gtf:YOgnAN10714; dana.YO.gff3:YOgnAN10714	The gene belongs to the new annotation (in GTF and GFF3 format), avaialble from NCBI GEO GSE99574 supplemntary files (see large-scale dataset).
gene (Drosophila grimshawi)	GH16482	FlyBase 2016_05	FlyBase:FBgn0123953
gene (Drosophila. grimshawi)	YOgnGR06478	Gene Expression Omnibus (GEO); This paper	dgri.YO.gtf:YOgnGR06478; dgri.YO.gff3:YOgnGR06478	The gene belongs to the new annotation (in GTF and GFF3 format), avaialble from NCBI GEO GSE99574 supplemntary files (see large-scale dataset).
gene (D. grimshawi)	YOgnGR03214	GEO; This paper	dgri.YO.gtf:YOgnGR03214; dgri.YO.gff3:YOgnGR03214	The gene belongs to the new annotation (in GTF and GFF3 format), avaialble from NCBI GEO GSE99574 supplemntary files (see large-scale dataset).
gene (Drosophila melanogaster)	CR42860	FlyBase 2017_03	FlyBase:FBgn0262107
gene (Drosophila persimilis)	GL23549 (dsx)	FlyBase 2017_03	FlyBase:FBgn0161139
gene (D. persimilis)	YOgnPE00925	GEO; This paper	dper.YO.gtf:YOgnPE00925; dper.YO.gff3:YOgnPE00925	The gene belongs to the new annotation (in GTF and GFF3 format), avaialble from NCBI GEO GSE99574 supplemntary files (see large-scale dataset).
gene (Drosophila willistoni)	GK27243	FlyBase 2017_03	FlyBase:FBgn0279109
gene (D. willistoni)	YOgnWI09161	GEO; This paper	dwil.YO.gtf:YOgnWI09161; dwil.YO.gff3:YOgnWI09161	The gene belongs to the new annotation (in GTF and GFF3 format), avaialble from NCBI GEO GSE99574 supplemntary files (see large-scale dataset).
gene (D. willistoni)	GK26840	FlyBase 2017_03	FlyBase:FBgn0278706
gene (D. willistoni)	YOgnWI03804	Gene Expression Omnibus; This paper	dwil.YO.gtf:YOgnWI03804; dwil.YO.gff3:YOgnWI03804	The gene belongs to the new annotation (in GTF and GFF3 format), avaialble from NCBI GEO GSE99574 supplemntary files (see large-scale dataset).
gene (D. willistoni)	GK20038	FlyBase 2017_03	FlyBase:FBgn0222035
gene (D. willistoni)	YOgnWI07915	GEO; This paper	dwil.YO.gtf:YOgnWI07915; dwil.YO.gff3:YOgnWI07915	The gene belongs to the new annotation (in GTF and GFF3 format), avaialble from NCBI GEO GSE99574 supplemntary files (see large-scale dataset).
gene (Drosophila virilis)	YOgnVI13637	GEO; This paper	dvir.YO.gtf:YOgnVI13637; dvir.YO.gff3:YOgnVI13637	The gene belongs to the new annotation (in GTF and GFF3 format), avaialble from NCBI GEO GSE99574 supplemntary files (see large-scale dataset).
gene (Drosophila yakuba)	YOgnYA12879 (roX1)	GEO; This paper	dyak.YO.gtf:YOgnYA12879; dyak.YO.gff3:YOgnYA12879	The gene belongs to the new annotation (in GTF and GFF3 format), avaialble from NCBI GEO GSE99574 supplemntary files (see large-scale dataset).
gene (D. yakuba)	YOgnYA06038	GEO; This paper	dyak.YO.gtf:YOgnYA06038; dyak.YO.gff3:YOgnYA06038	The gene belongs to the new annotation (in GTF and GFF3 format), avaialble from NCBI GEO GSE99574 supplemntary files (see large-scale dataset).
strain, strain background (D. ananassae)	Dana	Drosophila Species Stock Center (La Jolla, CA)	Drosophila Species Stock Center (La Jolla, CA):14024-0371.13	14024-0371.13 sequence availalbe at NCBI GenBank CH902617-CH916365. FlyBase Species:FBsp00000052.
strain, strain background (D. grimshawi)	Dgri	Hawaiian Drosophila Research Stock Center (Honolulu, HI)	Hawaiian Drosophila Research Stock Center (Honolulu, HI):15287-2541.00	15287-2541.00 sequence available at NCBI GenBank CH916366-CH933805. FlyBase Species:FBsp00000105
strain, strain background (D. melanogaster)	Dmel; w1118	Bloomington Drosophila Stock Center (Bloomington, IN)	Bloomington Drosophila Stock Center (Bloomington, IN):Oregon-R	FlyBase Species:FBsp00000001. FlyBase Strain:FBst0025211
strain, strain background (D. melanogaster)	Dmel; OreR	Bloomington Drosophila Stock Center (Bloomington, IN)	Bloomington Drosophila Stock Center (Bloomington, IN):w1118	FlyBase Species:FBsp00000001. FlyBase Strain:FBst0005905
strain, strain background (D. mojavensis)	Dmoj	Drosophila Species Stock Center (La Jolla, CA)	Drosophila Species Stock Center (La Jolla, CA):15081-1352.22	15081-1352.22 sequence available at NCBI GenBank CH933806-CH940646. FlyBase Species:FBsp00000160
strain, strain background (D. persimilis)	Dper	Drosophila Species Stock Center (La Jolla, CA)	Drosophila Species Stock Center (La Jolla, CA):14011-0111.49	14011-0111.49 sequence available at NCBI GenBank CH479179-CH480814 andCH689635-CH700836. FlyBase Species:FBsp00000188
strain, strain background (D. pseudoobscura)	Dpse	Drosophila Species Stock Center (La Jolla, CA)	Drosophila Species Stock Center (La Jolla, CA):14011-0121.94	14011-0121.94 sequence available at NCBI GenBank CM000070-CM000071, CH379058-CH379070, CH475397-CH476252, and CH672438-CH676462. FlyBase Species:FBsp00000201
strain, strain background (D. virilis)	Dvir	Drosophila Species Stock Center (La Jolla, CA)	Drosophila Species Stock Center (La Jolla, CA):15010-1051.87	15010-1051.87 sequence available at NCBI GenBank CH940647.1. FlyBase Species:FBsp00000251
strain, strain background (D. willistoni)	Dwil	Drosophila Species Stock Center (La Jolla, CA)	Drosophila Species Stock Center (La Jolla, CA):14030-0811.24	14030-0811.24 sequence available at NCBI GenBank CH959366.1. FlyBase Species:FBsp00000253
strain, strain background (D. yakuba)	Dyak	Drosophila Species Stock Center (La Jolla, CA)	Drosophila Species Stock Center (La Jolla, CA):14021-0261.01	14021-0261.01 sequence availbale at NCBI GenBank CH902559.1. FlyBase Species:FBsp00000254
genetic reagent ()
cell line ()
transfected construct ()
biological sample (D. ananassae female)	Dana female abdomen replicate 1	NCBI GEO; This paper	NCBI GEO:GSE99574	FlyBase CV:FBbt:00003004, FBcv:0000334, and FBbt:00000020 - FBbt:00007513 - FBbt:00005725
biological sample (D. ananassae female)	Dana female abdomen replicate 2	NCBI GEO; This paper	NCBI GEO:GSE99574	FlyBase CV:FBbt:00003004, FBcv:0000334, and FBbt:00000020 - FBbt:00007513 - FBbt:00005725
biological sample (D. ananassae female)	Dana female abdomen replicate 3	NCBI GEO; This paper	NCBI GEO:GSE99574	FlyBase CV:FBbt:00003004, FBcv:0000334, and FBbt:00000020 - FBbt:00007513 - FBbt:00005725
biological sample (D. ananassae female)	Dana female abdomen replicate 4	NCBI GEO; This paper	NCBI GEO:GSE99574	FlyBase CV:FBbt:00003004, FBcv:0000334, and FBbt:00000020 - FBbt:00007513 - FBbt:00005725
biological sample (D. ananassae female)	Dana female viscera replicate 1	NCBI GEO; This paper	NCBI GEO:GSE99574	FlyBase CV:FBbt:00003004, FBcv:0000334, and FBbt:00007513 + FBbt:00005725
biological sample (D. ananassae female)	Dana female viscera replicate 2	NCBI GEO; This paper	NCBI GEO:GSE99574	FlyBase CV:FBbt:00003004, FBcv:0000334, and FBbt:00007513 + FBbt:00005725
biological sample (D. ananassae female)	Dana female viscera replicate 3	NCBI GEO; This paper	NCBI GEO:GSE99574	FlyBase CV:FBbt:00003004, FBcv:0000334, and FBbt:00007513 + FBbt:00005725
biological sample (D. ananassae female)	Dana female viscera replicate 4	NCBI GEO; This paper	NCBI GEO:GSE99574	FlyBase CV:FBbt:00003004, FBcv:0000334, and FBbt:00007513 + FBbt:00005725
biological sample (D. ananassae female)	Dana female gonad replicate 1	NCBI GEO; This paper	NCBI GEO:GSE99574	FlyBase CV:FBbt:00003004, FBcv:0000334, and FBbt:00004858
biological sample (D. ananassae female)	Dana female gonad replicate 2	NCBI GEO; This paper	NCBI GEO:GSE99574	FlyBase CV:FBbt:00003004, FBcv:0000334, and FBbt:00004858
biological sample (D. ananassae female)	Dana female gonad replicate 3	NCBI GEO; This paper	NCBI GEO:GSE99574	FlyBase CV:FBbt:00003004, FBcv:0000334, and FBbt:00004858
biological sample (D. ananassae female)	Dana female gonad replicate 4	NCBI GEO; This paper	NCBI GEO:GSE99574	FlyBase CV:FBbt:00003004, FBcv:0000334, and FBbt:00004858
biological sample (D. ananassae female)	Dana female head replicate 1	NCBI GEO; This paper	NCBI GEO:GSE99574	FlyBase CV:FBbt:00003004, FBcv:0000334, and FBbt:00000004
biological sample (D. ananassae female)	Dana female head replicate 2	NCBI GEO; This paper	NCBI GEO:GSE99574	FlyBase CV:FBbt:00003004, FBcv:0000334, and FBbt:00000004
biological sample (D. ananassae female)	Dana female head replicate 3	NCBI GEO; This paper	NCBI GEO:GSE99574	FlyBase CV:FBbt:00003004, FBcv:0000334, and FBbt:00000004
biological sample (D. ananassae female)	Dana female head replicate 4	NCBI GEO; This paper	NCBI GEO:GSE99574	FlyBase CV:FBbt:00003004, FBcv:0000334, and FBbt:00000004
biological sample (D. ananassae female)	Dana female reproductive tract replicate 1	NCBI GEO; This paper	NCBI GEO:GSE99574	FlyBase CV:FBbt:00003004, FBcv:0000334, and FBbt:00004857 - FBbt:00004858 + FBbt:00004829
biological sample (D. ananassae female)	Dana female reproductive tract replicate 2	NCBI GEO; This paper	NCBI GEO:GSE99574	FlyBase CV:FBbt:00003004, FBcv:0000334, and FBbt:00004857 - FBbt:00004858 + FBbt:00004829
biological sample (D. ananassae female)	Dana female reproductive tract replicate 3	NCBI GEO; This paper	NCBI GEO:GSE99574	FlyBase CV:FBbt:00003004, FBcv:0000334, and FBbt:00004857 - FBbt:00004858 + FBbt:00004829
biological sample (D. ananassae female)	Dana female reproductive tract replicate 4	NCBI GEO; This paper	NCBI GEO:GSE99574	FlyBase CV:FBbt:00003004, FBcv:0000334, and FBbt:00004857 - FBbt:00004858 + FBbt:00004829
biological sample (D. ananassae female)	Dana female thorax replicate 1	NCBI GEO; This paper	NCBI GEO:GSE99574	FlyBase CV:FBbt:00003004, FBcv:0000334, and FBbt:00000015 - FBbt:00007513
biological sample (D. ananassae female)	Dana female thorax replicate 2	NCBI GEO; This paper	NCBI GEO:GSE99574	FlyBase CV:FBbt:00003004, FBcv:0000334, and FBbt:00000015 - FBbt:00007513
biological sample (D. ananassae female)	Dana female thorax replicate 3	NCBI GEO; This paper	NCBI GEO:GSE99574	FlyBase CV:FBbt:00003004, FBcv:0000334, and FBbt:00000015 - FBbt:00007513
biological sample (D. ananassae female)	Dana female thorax replicate 4	NCBI GEO; This paper	NCBI GEO:GSE99574	FlyBase CV:FBbt:00003004, FBcv:0000334, and FBbt:00000015 - FBbt:00007513
biological sample (D. ananassae female)	Dana female whole organism replicate 1	NCBI GEO; This paper	NCBI GEO:GSE99574	FlyBase CV:FBbt:00003004, FBcv:0000334, and FBbt:00000001
biological sample (D. ananassae female)	Dana female whole organism replicate 2	NCBI GEO; This paper	NCBI GEO:GSE99574	FlyBase CV:FBbt:00003004, FBcv:0000334, and FBbt:00000001
biological sample (D. ananassae female)	Dana female whole organism replicate 3	NCBI GEO; This paper	NCBI GEO:GSE99574	FlyBase CV:FBbt:00003004, FBcv:0000334, and FBbt:00000001
biological sample (D. ananassae female)	Dana female whole organism replicate 4	NCBI GEO; This paper	NCBI GEO:GSE99574	FlyBase CV:FBbt:00003004, FBcv:0000334, and FBbt:00000001
biological sample (D. ananassae male)	Dana male abdomen replicate 1	NCBI GEO; This paper	NCBI GEO:GSE99574	FlyBase CV:FBbt:00003004, FBcv:0000333, and FBbt:00000020 - FBbt:00007513 - FBbt:00005725
biological sample (D. ananassae male)	Dana male abdomen replicate 2	NCBI GEO; This paper	NCBI GEO:GSE99574	FlyBase CV:FBbt:00003004, FBcv:0000333, and FBbt:00000020 - FBbt:00007513 - FBbt:00005725
biological sample (D. ananassae male)	Dana male abdomen replicate 3	NCBI GEO; This paper	NCBI GEO:GSE99574	FlyBase CV:FBbt:00003004, FBcv:0000333, and FBbt:00000020 - FBbt:00007513 - FBbt:00005725
biological sample (D. ananassae male)	Dana male abdomen replicate 4	NCBI GEO; This paper	NCBI GEO:GSE99574	FlyBase CV:FBbt:00003004, FBcv:0000333, and FBbt:00000020 - FBbt:00007513 - FBbt:00005725
biological sample (D. ananassae male)	Dana male viscera replicate 1	NCBI GEO; This paper	NCBI GEO:GSE99574	FlyBase CV:FBbt:00003004, FBcv:0000333, and FBbt:00007513 + FBbt:00005725
biological sample (D. ananassae male)	Dana male viscera replicate 2	NCBI GEO; This paper	NCBI GEO:GSE99574	FlyBase CV:FBbt:00003004, FBcv:0000333, and FBbt:00007513 + FBbt:00005725
biological sample (D. ananassae male)	Dana male viscera replicate 3	NCBI GEO; This paper	NCBI GEO:GSE99574	FlyBase CV:FBbt:00003004, FBcv:0000333, and FBbt:00007513 + FBbt:00005725
biological sample (D. ananassae male)	Dana male viscera replicate 4	NCBI GEO; This paper	NCBI GEO:GSE99574	FlyBase CV:FBbt:00003004, FBcv:0000333, and FBbt:00007513 + FBbt:00005725
biological sample (D. ananassae male)	Dana male gonad replicate 1	NCBI GEO; This paper	NCBI GEO:GSE99574	FlyBase CV:FBbt:00003004, FBcv:0000333, and FBbt:00004858
biological sample (D. ananassae male)	Dana male gonad replicate 2	NCBI GEO; This paper	NCBI GEO:GSE99574	FlyBase CV:FBbt:00003004, FBcv:0000333, and FBbt:00004858
biological sample (D. ananassae male)	Dana male gonad replicate 3	NCBI GEO; This paper	NCBI GEO:GSE99574	FlyBase CV:FBbt:00003004, FBcv:0000333, and FBbt:00004858
biological sample (D. ananassae male)	Dana male gonad replicate 4	NCBI GEO; This paper	NCBI GEO:GSE99574	FlyBase CV:FBbt:00003004, FBcv:0000333, and FBbt:00004858
biological sample (D. ananassae male)	Dana male head replicate 1	NCBI GEO; This paper	NCBI GEO:GSE99574	FlyBase CV:FBbt:00003004, FBcv:0000333, and FBbt:00000004
biological sample (D. ananassae male)	Dana male head replicate 2	NCBI GEO; This paper	NCBI GEO:GSE99574	FlyBase CV:FBbt:00003004, FBcv:0000333, and FBbt:00000004
biological sample (D. ananassae male)	Dana male head replicate 3	NCBI GEO; This paper	NCBI GEO:GSE99574	FlyBase CV:FBbt:00003004, FBcv:0000333, and FBbt:00000004
biological sample (D. ananassae male)	Dana male head replicate 4	NCBI GEO; This paper	NCBI GEO:GSE99574	FlyBase CV:FBbt:00003004, FBcv:0000333, and FBbt:00000004
biological sample (D. ananassae male)	Dana male reproductive tract replicate 1	NCBI GEO; This paper	NCBI GEO:GSE99574	FlyBase CV:FBbt:00003004, FBcv:0000333, and FBbt:00004857 - FBbt:00004858 + FBbt:00004829
biological sample (D. ananassae male)	Dana male reproductive tract replicate 2	NCBI GEO; This paper	NCBI GEO:GSE99574	FlyBase CV:FBbt:00003004, FBcv:0000333, and FBbt:00004857 - FBbt:00004858 + FBbt:00004829
biological sample (D. ananassae male)	Dana male reproductive tract replicate 3	NCBI GEO; This paper	NCBI GEO:GSE99574	FlyBase CV:FBbt:00003004, FBcv:0000333, and FBbt:00004857 - FBbt:00004858 + FBbt:00004829
biological sample (D. ananassae male)	Dana male reproductive tract replicate 4	NCBI GEO; This paper	NCBI GEO:GSE99574	FlyBase CV:FBbt:00003004, FBcv:0000333, and FBbt:00004857 - FBbt:00004858 + FBbt:00004829
biological sample (D. ananassae male)	Dana male thorax replicate 1	NCBI GEO; This paper	NCBI GEO:GSE99574	FlyBase CV:FBbt:00003004, FBcv:0000333, and FBbt:00000015 - FBbt:00007513
biological sample (D. ananassae male)	Dana male thorax replicate 2	NCBI GEO; This paper	NCBI GEO:GSE99574	FlyBase CV:FBbt:00003004, FBcv:0000333, and FBbt:00000015 - FBbt:00007513
biological sample (D. ananassae male)	Dana male thorax replicate 3	NCBI GEO; This paper	NCBI GEO:GSE99574	FlyBase CV:FBbt:00003004, FBcv:0000333, and FBbt:00000015 - FBbt:00007513
biological sample (D. ananassae male)	Dana male thorax replicate 4	NCBI GEO; This paper	NCBI GEO:GSE99574	FlyBase CV:FBbt:00003004, FBcv:0000333, and FBbt:00000015 - FBbt:00007513
biological sample (D. ananassae male)	Dana male whole organism replicate 1	NCBI GEO; This paper	NCBI GEO:GSE99574	FlyBase CV:FBbt:00003004, FBcv:0000333, and FBbt:00000001
biological sample (D. ananassae male)	Dana male whole organism replicate 2	NCBI GEO; This paper	NCBI GEO:GSE99574	FlyBase CV:FBbt:00003004, FBcv:0000333, and FBbt:00000001
biological sample (D. ananassae male)	Dana male whole organism replicate 3	NCBI GEO; This paper	NCBI GEO:GSE99574	FlyBase CV:FBbt:00003004, FBcv:0000333, and FBbt:00000001
biological sample (D. ananassae male)	Dana male whole organism replicate 4	NCBI GEO; This paper	NCBI GEO:GSE99574	FlyBase CV:FBbt:00003004, FBcv:0000333, and FBbt:00000001
biological sample (D. grimshawi female)	Dgri female abdomen replicate 1	NCBI BioSample; This paper	NCBI BioSample:SAMN04632229	FlyBase CV:FBbt:00003004, FBcv:0000334, and FBbt:00000020 - FBbt:00007513 - FBbt:00005725
biological sample (D. grimshawi female)	Dgri female abdomen replicate 2	NCBI BioSample; This paper	NCBI BioSample:SAMN04632227	FlyBase CV:FBbt:00003004, FBcv:0000334, and FBbt:00000020 - FBbt:00007513 - FBbt:00005725
biological sample (D. grimshawi female)	Dgri female abdomen replicate 3	NCBI BioSample; This paper	NCBI BioSample:SAMN04632228	FlyBase CV:FBbt:00003004, FBcv:0000334, and FBbt:00000020 - FBbt:00007513 - FBbt:00005725
biological sample (D. grimshawi female)	Dgri female abdomen replicate 4	NCBI BioSample; This paper	NCBI BioSample:SAMN04632230	FlyBase CV:FBbt:00003004, FBcv:0000334, and FBbt:00000020 - FBbt:00007513 - FBbt:00005725
biological sample (D. grimshawi female)	Dgri female viscera replicate 1	NCBI BioSample; This paper	NCBI BioSample:SAMN04632231	FlyBase CV:FBbt:00003004, FBcv:0000334, and FBbt:00007513 + FBbt:00005725
biological sample (D. grimshawi female)	Dgri female viscera replicate 2	NCBI BioSample; This paper	NCBI BioSample:SAMN04632232	FlyBase CV:FBbt:00003004, FBcv:0000334, and FBbt:00007513 + FBbt:00005725
biological sample (D. grimshawi female)	Dgri female viscera replicate 3	NCBI BioSample; This paper	NCBI BioSample:SAMN04632233	FlyBase CV:FBbt:00003004, FBcv:0000334, and FBbt:00007513 + FBbt:00005725
biological sample (D. grimshawi female)	Dgri female viscera replicate 4	NCBI BioSample; This paper	NCBI BioSample:SAMN04632234	FlyBase CV:FBbt:00003004, FBcv:0000334, and FBbt:00007513 + FBbt:00005725
biological sample (D. grimshawi female)	Dgri female terminalia replicate 1	NCBI BioSample; This paper	NCBI BioSample:SAMN04632235	FlyBase CV:FBbt:00003004, FBcv:0000334, and FBbt:00004829
biological sample (D. grimshawi female)	Dgri female terminalia replicate 2	NCBI BioSample; This paper	NCBI BioSample:SAMN04632236	FlyBase CV:FBbt:00003004, FBcv:0000334, and FBbt:00004829
biological sample (D. grimshawi female)	Dgri female terminalia replicate 3	NCBI BioSample; This paper	NCBI BioSample:SAMN04632237	FlyBase CV:FBbt:00003004, FBcv:0000334, and FBbt:00004829
biological sample (D. grimshawi female)	Dgri female terminalia replicate 4	NCBI BioSample; This paper	NCBI BioSample:SAMN04632238	FlyBase CV:FBbt:00003004, FBcv:0000334, and FBbt:00004829
biological sample (D. grimshawi female)	Dgri female gonad replicate 1	NCBI BioSample; This paper	NCBI BioSample:SAMN04632239	FlyBase CV:FBbt:00003004, FBcv:0000334, and FBbt:00004858
biological sample (D. grimshawi female)	Dgri female gonad replicate 2	NCBI BioSample; This paper	NCBI BioSample:SAMN04632240	FlyBase CV:FBbt:00003004, FBcv:0000334, and FBbt:00004858
biological sample (D. grimshawi female)	Dgri female gonad replicate 3	NCBI BioSample; This paper	NCBI BioSample:SAMN04632241	FlyBase CV:FBbt:00003004, FBcv:0000334, and FBbt:00004858
biological sample (D. grimshawi female)	Dgri female gonad replicate 4	NCBI BioSample; This paper	NCBI BioSample:SAMN04632242	FlyBase CV:FBbt:00003004, FBcv:0000334, and FBbt:00004858
biological sample (D. grimshawi female)	Dgri female head replicate 1	NCBI BioSample; This paper	NCBI BioSample:SAMN04632243	FlyBase CV:FBbt:00003004, FBcv:0000334, and FBbt:00000004
biological sample (D. grimshawi female)	Dgri female head replicate 2	NCBI BioSample; This paper	NCBI BioSample:SAMN04632244	FlyBase CV:FBbt:00003004, FBcv:0000334, and FBbt:00000004
biological sample (D. grimshawi female)	Dgri female head replicate 3	NCBI BioSample; This paper	NCBI BioSample:SAMN04632245	FlyBase CV:FBbt:00003004, FBcv:0000334, and FBbt:00000004
biological sample (D. grimshawi female)	Dgri female head replicate 4	NCBI BioSample; This paper	NCBI BioSample:SAMN04632246	FlyBase CV:FBbt:00003004, FBcv:0000334, and FBbt:00000004
biological sample (D. grimshawi female)	Dgri female internal reproductive tract replicate 1	NCBI BioSample; This paper	NCBI BioSample:SAMN04632247	FlyBase CV:FBbt:00003004, FBcv:0000334, and FBbt:00004857 - FBbt:00004858
biological sample (D. grimshawi female)	Dgri female internal reproductive tract replicate 2	NCBI BioSample; This paper	NCBI BioSample:SAMN04632248	FlyBase CV:FBbt:00003004, FBcv:0000334, and FBbt:00004857 - FBbt:00004858
biological sample (D. grimshawi female)	Dgri female internal reproductive tract replicate 3	NCBI BioSample; This paper	NCBI BioSample:SAMN04632249	FlyBase CV:FBbt:00003004, FBcv:0000334, and FBbt:00004857 - FBbt:00004858
biological sample (D. grimshawi female)	Dgri female internal reproductive tract replicate 4	NCBI BioSample; This paper	NCBI BioSample:SAMN04632250	FlyBase CV:FBbt:00003004, FBcv:0000334, and FBbt:00004857 - FBbt:00004858
biological sample (D. grimshawi female)	Dgri female thorax replicate 1	NCBI BioSample; This paper	NCBI BioSample:SAMN04632251	FlyBase CV:FBbt:00003004, FBcv:0000334, and FBbt:00000015 - FBbt:00007513
biological sample (D. grimshawi female)	Dgri female thorax replicate 2	NCBI BioSample; This paper	NCBI BioSample:SAMN04632252	FlyBase CV:FBbt:00003004, FBcv:0000334, and FBbt:00000015 - FBbt:00007513
biological sample (D. grimshawi female)	Dgri female thorax replicate 3	NCBI BioSample; This paper	NCBI BioSample:SAMN04632253	FlyBase CV:FBbt:00003004, FBcv:0000334, and FBbt:00000015 - FBbt:00007513
biological sample (D. grimshawi female)	Dgri female thorax replicate 4	NCBI BioSample; This paper	NCBI BioSample:SAMN04632284	FlyBase CV:FBbt:00003004, FBcv:0000334, and FBbt:00000015 - FBbt:00007513
biological sample (D. grimshawi female)	Dgri female whole organism replicate 1	NCBI BioSample; This paper	NCBI BioSample:SAMN04632200	FlyBase CV:FBbt:00003004, FBcv:0000334, and FBbt:00000001
biological sample (D. grimshawi female)	Dgri female whole organism replicate 2	NCBI BioSample; This paper	NCBI BioSample:SAMN04632201	FlyBase CV:FBbt:00003004, FBcv:0000334, and FBbt:00000001
biological sample (D. grimshawi female)	Dgri female whole organism replicate 3	NCBI BioSample; This paper	NCBI BioSample:SAMN04632202	FlyBase CV:FBbt:00003004, FBcv:0000334, and FBbt:00000001
biological sample (D. grimshawi female)	Dgri female whole organism replicate 4	NCBI BioSample; This paper	NCBI BioSample:SAMN04632197	FlyBase CV:FBbt:00003004, FBcv:0000334, and FBbt:00000001
biological sample (D. grimshawi male)	Dgri male abdomen replicate 1	NCBI BioSample; This paper	NCBI BioSample:SAMN04632198	FlyBase CV:FBbt:00003004, FBcv:0000333, and FBbt:00000020 - FBbt:00007513 - FBbt:00005725
biological sample (D. grimshawi male)	Dgri male abdomen replicate 2	NCBI BioSample; This paper	NCBI BioSample:SAMN04632199	FlyBase CV:FBbt:00003004, FBcv:0000333, and FBbt:00000020 - FBbt:00007513 - FBbt:00005725
biological sample (D. grimshawi male)	Dgri male abdomen replicate 3	NCBI BioSample; This paper	NCBI BioSample:SAMN04632203	FlyBase CV:FBbt:00003004, FBcv:0000333, and FBbt:00000020 - FBbt:00007513 - FBbt:00005725
biological sample (D. grimshawi male)	Dgri male abdomen replicate 4	NCBI BioSample; This paper	NCBI BioSample:SAMN04632204	FlyBase CV:FBbt:00003004, FBcv:0000333, and FBbt:00000020 - FBbt:00007513 - FBbt:00005725
biological sample (D. grimshawi male)	Dgri male viscera replicate 1	NCBI BioSample; This paper	NCBI BioSample:SAMN04632205	FlyBase CV:FBbt:00003004, FBcv:0000333, and FBbt:00007513 + FBbt:00005725
biological sample (D. grimshawi male)	Dgri male viscera replicate 2	NCBI BioSample; This paper	NCBI BioSample:SAMN04632206	FlyBase CV:FBbt:00003004, FBcv:0000333, and FBbt:00007513 + FBbt:00005725
biological sample (D. grimshawi male)	Dgri male viscera replicate 3	NCBI BioSample; This paper	NCBI BioSample:SAMN04632207	FlyBase CV:FBbt:00003004, FBcv:0000333, and FBbt:00007513 + FBbt:00005725
biological sample (D. grimshawi male)	Dgri male viscera replicate 4	NCBI BioSample; This paper	NCBI BioSample:SAMN04632208	FlyBase CV:FBbt:00003004, FBcv:0000333, and FBbt:00007513 + FBbt:00005725
biological sample (D. grimshawi male)	Dgri male terminalia replicate 1	NCBI BioSample; This paper	NCBI BioSample:SAMN04632209	FlyBase CV:FBbt:00003004, FBcv:0000333, and FBbt:00004829
biological sample (D. grimshawi male)	Dgri male terminalia replicate 2	NCBI BioSample; This paper	NCBI BioSample:SAMN04632210	FlyBase CV:FBbt:00003004, FBcv:0000333, and FBbt:00004829
biological sample (D. grimshawi male)	Dgri male terminalia replicate 3	NCBI BioSample; This paper	NCBI BioSample:SAMN04632211	FlyBase CV:FBbt:00003004, FBcv:0000333, and FBbt:00004829
biological sample (D. grimshawi male)	Dgri male terminalia replicate 4	NCBI BioSample; This paper	NCBI BioSample:SAMN04632212	FlyBase CV:FBbt:00003004, FBcv:0000333, and FBbt:00004829
biological sample (D. grimshawi male)	Dgri male gonad replicate 1	NCBI BioSample; This paper	NCBI BioSample:SAMN04632213	FlyBase CV:FBbt:00003004, FBcv:0000333, and FBbt:00004858
biological sample (D. grimshawi male)	Dgri male gonad replicate 2	NCBI BioSample; This paper	NCBI BioSample:SAMN04632214	FlyBase CV:FBbt:00003004, FBcv:0000333, and FBbt:00004858
biological sample (D. grimshawi male)	Dgri male gonad replicate 3	NCBI BioSample; This paper	NCBI BioSample:SAMN04632215	FlyBase CV:FBbt:00003004, FBcv:0000333, and FBbt:00004858
biological sample (D. grimshawi male)	Dgri male gonad replicate 4	NCBI BioSample; This paper	NCBI BioSample:SAMN04632216	FlyBase CV:FBbt:00003004, FBcv:0000333, and FBbt:00004858
biological sample (D. grimshawi male)	Dgri male head replicate 1	NCBI BioSample; This paper	NCBI BioSample:SAMN04632217	FlyBase CV:FBbt:00003004, FBcv:0000333, and FBbt:00000004
biological sample (D. grimshawi male)	Dgri male head replicate 2	NCBI BioSample; This paper	NCBI BioSample:SAMN04632218	FlyBase CV:FBbt:00003004, FBcv:0000333, and FBbt:00000004
biological sample (D. grimshawi male)	Dgri male head replicate 3	NCBI BioSample; This paper	NCBI BioSample:SAMN04632219	FlyBase CV:FBbt:00003004, FBcv:0000333, and FBbt:00000004
biological sample (D. grimshawi male)	Dgri male head replicate 4	NCBI BioSample; This paper	NCBI BioSample:SAMN04632220	FlyBase CV:FBbt:00003004, FBcv:0000333, and FBbt:00000004
biological sample (D. grimshawi male)	Dgri male internal reproductive tract replicate 1	NCBI BioSample; This paper	NCBI BioSample:SAMN04632221	FlyBase CV:FBbt:00003004, FBcv:0000333, and FBbt:00004857 - FBbt:00004858
biological sample (D. grimshawi male)	Dgri male internal reproductive tract replicate 2	NCBI BioSample; This paper	NCBI BioSample:SAMN04632223	FlyBase CV:FBbt:00003004, FBcv:0000333, and FBbt:00004857 - FBbt:00004858
biological sample (D. grimshawi male)	Dgri male internal reproductive tract replicate 3	NCBI BioSample; This paper	NCBI BioSample:SAMN04632224	FlyBase CV:FBbt:00003004, FBcv:0000333, and FBbt:00004857 - FBbt:00004858
biological sample (D. grimshawi male)	Dgri male internal reproductive tract replicate 4	NCBI BioSample; This paper	NCBI BioSample:SAMN04632225	FlyBase CV:FBbt:00003004, FBcv:0000333, and FBbt:00004857 - FBbt:00004858
biological sample (D. grimshawi male)	Dgri male thorax replicate 1	NCBI BioSample; This paper	NCBI BioSample:SAMN04632226	FlyBase CV:FBbt:00003004, FBcv:0000333, and FBbt:00000015 - FBbt:00007513
biological sample (D. grimshawi male)	Dgri male thorax replicate 2	NCBI BioSample; This paper	NCBI BioSample:SAMN04632135	FlyBase CV:FBbt:00003004, FBcv:0000333, and FBbt:00000015 - FBbt:00007513
biological sample (D. grimshawi male)	Dgri male thorax replicate 3	NCBI BioSample; This paper	NCBI BioSample:SAMN04632136	FlyBase CV:FBbt:00003004, FBcv:0000333, and FBbt:00000015 - FBbt:00007513
biological sample (D. grimshawi male)	Dgri male thorax replicate 4	NCBI BioSample; This paper	NCBI BioSample:SAMN04632137	FlyBase CV:FBbt:00003004, FBcv:0000333, and FBbt:00000015 - FBbt:00007513
biological sample (D. grimshawi male)	Dgri male whole organism replicate 1	NCBI BioSample; This paper	NCBI BioSample:SAMN04632138	FlyBase CV:FBbt:00003004, FBcv:0000333, and FBbt:00000001
biological sample (D. grimshawi male)	Dgri male whole organism replicate 2	NCBI BioSample; This paper	NCBI BioSample:SAMN04632139	FlyBase CV:FBbt:00003004, FBcv:0000333, and FBbt:00000001
biological sample (D. grimshawi male)	Dgri male whole organism replicate 3	NCBI BioSample; This paper	NCBI BioSample:SAMN04632140	FlyBase CV:FBbt:00003004, FBcv:0000333, and FBbt:00000001
biological sample (D. grimshawi male)	Dgri male whole organism replicate 4	NCBI BioSample; This paper	NCBI BioSample:SAMN04632141	FlyBase CV:FBbt:00003004, FBcv:0000333, and FBbt:00000001
biological sample (D. mojavensis female)	Dmoj female abdomen replicate 1	NCBI GEO; This paper	NCBI GEO:GSE99574	FlyBase CV:FBbt:00003004, FBcv:0000334, and FBbt:00000020 - FBbt:00007513 - FBbt:00005725
biological sample (D. mojavensis female)	Dmoj female abdomen replicate 2	NCBI GEO; This paper	NCBI GEO:GSE99574	FlyBase CV:FBbt:00003004, FBcv:0000334, and FBbt:00000020 - FBbt:00007513 - FBbt:00005725
biological sample (D. mojavensis female)	Dmoj female abdomen replicate 3	NCBI GEO; This paper	NCBI GEO:GSE99574	FlyBase CV:FBbt:00003004, FBcv:0000334, and FBbt:00000020 - FBbt:00007513 - FBbt:00005725
biological sample (D. mojavensis female)	Dmoj female abdomen replicate 4	NCBI GEO; This paper	NCBI GEO:GSE99574	FlyBase CV:FBbt:00003004, FBcv:0000334, and FBbt:00000020 - FBbt:00007513 - FBbt:00005725
biological sample (D. mojavensis female)	Dmoj female viscera replicate 1	NCBI GEO; This paper	NCBI GEO:GSE99574	FlyBase CV:FBbt:00003004, FBcv:0000334, and FBbt:00007513 + FBbt:00005725
biological sample (D. mojavensis female)	Dmoj female viscera replicate 2	NCBI GEO; This paper	NCBI GEO:GSE99574	FlyBase CV:FBbt:00003004, FBcv:0000334, and FBbt:00007513 + FBbt:00005725
biological sample (D. mojavensis female)	Dmoj female viscera replicate 3	NCBI GEO; This paper	NCBI GEO:GSE99574	FlyBase CV:FBbt:00003004, FBcv:0000334, and FBbt:00007513 + FBbt:00005725
biological sample (D. mojavensis female)	Dmoj female viscera replicate 4	NCBI GEO; This paper	NCBI GEO:GSE99574	FlyBase CV:FBbt:00003004, FBcv:0000334, and FBbt:00007513 + FBbt:00005725
biological sample (D. mojavensis female)	Dmoj female gonad replicate 1	NCBI GEO; This paper	NCBI GEO:GSE99574	FlyBase CV:FBbt:00003004, FBcv:0000334, and FBbt:00004858
biological sample (D. mojavensis female)	Dmoj female gonad replicate 2	NCBI GEO; This paper	NCBI GEO:GSE99574	FlyBase CV:FBbt:00003004, FBcv:0000334, and FBbt:00004858
biological sample (D. mojavensis female)	Dmoj female gonad replicate 3	NCBI GEO; This paper	NCBI GEO:GSE99574	FlyBase CV:FBbt:00003004, FBcv:0000334, and FBbt:00004858
biological sample (D. mojavensis female)	Dmoj female gonad replicate 4	NCBI GEO; This paper	NCBI GEO:GSE99574	FlyBase CV:FBbt:00003004, FBcv:0000334, and FBbt:00004858
biological sample (D. mojavensis female)	Dmoj female head replicate 1	NCBI GEO; This paper	NCBI GEO:GSE99574	FlyBase CV:FBbt:00003004, FBcv:0000334, and FBbt:00000004
biological sample (D. mojavensis female)	Dmoj female head replicate 2	NCBI GEO; This paper	NCBI GEO:GSE99574	FlyBase CV:FBbt:00003004, FBcv:0000334, and FBbt:00000004
biological sample (D. mojavensis female)	Dmoj female head replicate 3	NCBI GEO; This paper	NCBI GEO:GSE99574	FlyBase CV:FBbt:00003004, FBcv:0000334, and FBbt:00000004
biological sample (D. mojavensis female)	Dmoj female head replicate 4	NCBI GEO; This paper	NCBI GEO:GSE99574	FlyBase CV:FBbt:00003004, FBcv:0000334, and FBbt:00000004
biological sample (D. mojavensis female)	Dmoj female reproductive tract replicate 1	NCBI GEO; This paper	NCBI GEO:GSE99574	FlyBase CV:FBbt:00003004, FBcv:0000334, and FBbt:00004857 - FBbt:00004858 + FBbt:00004829
biological sample (D. mojavensis female)	Dmoj female reproductive tract replicate 2	NCBI GEO; This paper	NCBI GEO:GSE99574	FlyBase CV:FBbt:00003004, FBcv:0000334, and FBbt:00004857 - FBbt:00004858 + FBbt:00004829
biological sample (D. mojavensis female)	Dmoj female reproductive tract replicate 3	NCBI GEO; This paper	NCBI GEO:GSE99574	FlyBase CV:FBbt:00003004, FBcv:0000334, and FBbt:00004857 - FBbt:00004858 + FBbt:00004829
biological sample (D. mojavensis female)	Dmoj female reproductive tract replicate 4	NCBI GEO; This paper	NCBI GEO:GSE99574	FlyBase CV:FBbt:00003004, FBcv:0000334, and FBbt:00004857 - FBbt:00004858 + FBbt:00004829
biological sample (D. mojavensis female)	Dmoj female thorax replicate 1	NCBI GEO; This paper	NCBI GEO:GSE99574	FlyBase CV:FBbt:00003004, FBcv:0000334, and FBbt:00000015 - FBbt:00007513
biological sample (D. mojavensis female)	Dmoj female thorax replicate 2	NCBI GEO; This paper	NCBI GEO:GSE99574	FlyBase CV:FBbt:00003004, FBcv:0000334, and FBbt:00000015 - FBbt:00007513
biological sample (D. mojavensis female)	Dmoj female thorax replicate 3	NCBI GEO; This paper	NCBI GEO:GSE99574	FlyBase CV:FBbt:00003004, FBcv:0000334, and FBbt:00000015 - FBbt:00007513
biological sample (D. mojavensis female)	Dmoj female thorax replicate 4	NCBI GEO; This paper	NCBI GEO:GSE99574	FlyBase CV:FBbt:00003004, FBcv:0000334, and FBbt:00000015 - FBbt:00007513
biological sample (D. mojavensis female)	Dmoj female whole organism replicate 1	NCBI GEO; This paper	NCBI GEO:GSE99574	FlyBase CV:FBbt:00003004, FBcv:0000334, and FBbt:00000001
biological sample (D. mojavensis female)	Dmoj female whole organism replicate 2	NCBI GEO; This paper	NCBI GEO:GSE99574	FlyBase CV:FBbt:00003004, FBcv:0000334, and FBbt:00000001
biological sample (D. mojavensis female)	Dmoj female whole organism replicate 3	NCBI GEO; This paper	NCBI GEO:GSE99574	FlyBase CV:FBbt:00003004, FBcv:0000334, and FBbt:00000001
biological sample (D. mojavensis female)	Dmoj female whole organism replicate 4	NCBI GEO; This paper	NCBI GEO:GSE99574	FlyBase CV:FBbt:00003004, FBcv:0000334, and FBbt:00000001
biological sample (D. mojavensis male)	Dmoj male abdomen replicate 1	NCBI GEO; This paper	NCBI GEO:GSE99574	FlyBase CV:FBbt:00003004, FBcv:0000333, and FBbt:00000020 - FBbt:00007513 - FBbt:00005725
biological sample (D. mojavensis male)	Dmoj male abdomen replicate 2	NCBI GEO; This paper	NCBI GEO:GSE99574	FlyBase CV:FBbt:00003004, FBcv:0000333, and FBbt:00000020 - FBbt:00007513 - FBbt:00005725
biological sample (D. mojavensis male)	Dmoj male abdomen replicate 3	NCBI GEO; This paper	NCBI GEO:GSE99574	FlyBase CV:FBbt:00003004, FBcv:0000333, and FBbt:00000020 - FBbt:00007513 - FBbt:00005725
biological sample (D. mojavensis male)	Dmoj male abdomen replicate 4	NCBI GEO; This paper	NCBI GEO:GSE99574	FlyBase CV:FBbt:00003004, FBcv:0000333, and FBbt:00000020 - FBbt:00007513 - FBbt:00005725
biological sample (D. mojavensis male)	Dmoj male viscera replicate 1	NCBI GEO; This paper	NCBI GEO:GSE99574	FlyBase CV:FBbt:00003004, FBcv:0000333, and FBbt:00007513 + FBbt:00005725
biological sample (D. mojavensis male)	Dmoj male viscera replicate 2	NCBI GEO; This paper	NCBI GEO:GSE99574	FlyBase CV:FBbt:00003004, FBcv:0000333, and FBbt:00007513 + FBbt:00005725
biological sample (D. mojavensis male)	Dmoj male viscera replicate 3	NCBI GEO; This paper	NCBI GEO:GSE99574	FlyBase CV:FBbt:00003004, FBcv:0000333, and FBbt:00007513 + FBbt:00005725
biological sample (D. mojavensis male)	Dmoj male viscera replicate 4	NCBI GEO; This paper	NCBI GEO:GSE99574	FlyBase CV:FBbt:00003004, FBcv:0000333, and FBbt:00007513 + FBbt:00005725
biological sample (D. mojavensis male)	Dmoj male gonad replicate 1	NCBI GEO; This paper	NCBI GEO:GSE99574	FlyBase CV:FBbt:00003004, FBcv:0000333, and FBbt:00004858
biological sample (D. mojavensis male)	Dmoj male gonad replicate 2	NCBI GEO; This paper	NCBI GEO:GSE99574	FlyBase CV:FBbt:00003004, FBcv:0000333, and FBbt:00004858
biological sample (D. mojavensis male)	Dmoj male gonad replicate 3	NCBI GEO; This paper	NCBI GEO:GSE99574	FlyBase CV:FBbt:00003004, FBcv:0000333, and FBbt:00004858
biological sample (D. mojavensis male)	Dmoj male gonad replicate 4	NCBI GEO; This paper	NCBI GEO:GSE99574	FlyBase CV:FBbt:00003004, FBcv:0000333, and FBbt:00004858
biological sample (D. mojavensis male)	Dmoj male head replicate 1	NCBI GEO; This paper	NCBI GEO:GSE99574	FlyBase CV:FBbt:00003004, FBcv:0000333, and FBbt:00000004
biological sample (D. mojavensis male)	Dmoj male head replicate 2	NCBI GEO; This paper	NCBI GEO:GSE99574	FlyBase CV:FBbt:00003004, FBcv:0000333, and FBbt:00000004
biological sample (D. mojavensis male)	Dmoj male head replicate 3	NCBI GEO; This paper	NCBI GEO:GSE99574	FlyBase CV:FBbt:00003004, FBcv:0000333, and FBbt:00000004
biological sample (D. mojavensis male)	Dmoj male head replicate 4	NCBI GEO; This paper	NCBI GEO:GSE99574	FlyBase CV:FBbt:00003004, FBcv:0000333, and FBbt:00000004
biological sample (D. mojavensis male)	Dmoj male reproductive tract replicate 1	NCBI GEO; This paper	NCBI GEO:GSE99574	FlyBase CV:FBbt:00003004, FBcv:0000333, and FBbt:00004857 - FBbt:00004858 + FBbt:00004829
biological sample (D. mojavensis male)	Dmoj male reproductive tract replicate 2	NCBI GEO; This paper	NCBI GEO:GSE99574	FlyBase CV:FBbt:00003004, FBcv:0000333, and FBbt:00004857 - FBbt:00004858 + FBbt:00004829
biological sample (D. mojavensis male)	Dmoj male reproductive tract replicate 3	NCBI GEO; This paper	NCBI GEO:GSE99574	FlyBase CV:FBbt:00003004, FBcv:0000333, and FBbt:00004857 - FBbt:00004858 + FBbt:00004829
biological sample (D. mojavensis male)	Dmoj male reproductive tract replicate 4	NCBI GEO; This paper	NCBI GEO:GSE99574	FlyBase CV:FBbt:00003004, FBcv:0000333, and FBbt:00004857 - FBbt:00004858 + FBbt:00004829
biological sample (D. mojavensis male)	Dmoj male thorax replicate 1	NCBI GEO; This paper	NCBI GEO:GSE99574	FlyBase CV:FBbt:00003004, FBcv:0000333, and FBbt:00000015 - FBbt:00007513
biological sample (D. mojavensis male)	Dmoj male thorax replicate 2	NCBI GEO; This paper	NCBI GEO:GSE99574	FlyBase CV:FBbt:00003004, FBcv:0000333, and FBbt:00000015 - FBbt:00007513
biological sample (D. mojavensis male)	Dmoj male thorax replicate 3	NCBI GEO; This paper	NCBI GEO:GSE99574	FlyBase CV:FBbt:00003004, FBcv:0000333, and FBbt:00000015 - FBbt:00007513
biological sample (D. mojavensis male)	Dmoj male thorax replicate 4	NCBI GEO; This paper	NCBI GEO:GSE99574	FlyBase CV:FBbt:00003004, FBcv:0000333, and FBbt:00000015 - FBbt:00007513
biological sample (D. mojavensis male)	Dmoj male whole organism replicate 1	NCBI GEO; This paper	NCBI GEO:GSE99574	FlyBase CV:FBbt:00003004, FBcv:0000333, and FBbt:00000001
biological sample (D. mojavensis male)	Dmoj male whole organism replicate 2	NCBI GEO; This paper	NCBI GEO:GSE99574	FlyBase CV:FBbt:00003004, FBcv:0000333, and FBbt:00000001
biological sample (D. mojavensis male)	Dmoj male whole organism replicate 3	NCBI GEO; This paper	NCBI GEO:GSE99574	FlyBase CV:FBbt:00003004, FBcv:0000333, and FBbt:00000001
biological sample (D. mojavensis male)	Dmoj male whole organism replicate 4	NCBI GEO; This paper	NCBI GEO:GSE99574	FlyBase CV:FBbt:00003004, FBcv:0000333, and FBbt:00000001
biological sample (D. persimilis female)	Dper female abdomen replicate 1	NCBI GEO; This paper	NCBI GEO:GSE99574	FlyBase CV:FBbt:00003004, FBcv:0000334, and FBbt:00000020 - FBbt:00007513 - FBbt:00005725
biological sample (D. persimilis female)	Dper female abdomen replicate 2	NCBI GEO; This paper	NCBI GEO:GSE99574	FlyBase CV:FBbt:00003004, FBcv:0000334, and FBbt:00000020 - FBbt:00007513 - FBbt:00005725
biological sample (D. persimilis female)	Dper female abdomen replicate 3	NCBI GEO; This paper	NCBI GEO:GSE99574	FlyBase CV:FBbt:00003004, FBcv:0000334, and FBbt:00000020 - FBbt:00007513 - FBbt:00005725
biological sample (D. persimilis female)	Dper female abdomen replicate 4	NCBI GEO; This paper	NCBI GEO:GSE99574	FlyBase CV:FBbt:00003004, FBcv:0000334, and FBbt:00000020 - FBbt:00007513 - FBbt:00005725
biological sample (D. persimilis female)	Dper female viscera replicate 1	NCBI GEO; This paper	NCBI GEO:GSE99574	FlyBase CV:FBbt:00003004, FBcv:0000334, and FBbt:00007513 + FBbt:00005725
biological sample (D. persimilis female)	Dper female viscera replicate 2	NCBI GEO; This paper	NCBI GEO:GSE99574	FlyBase CV:FBbt:00003004, FBcv:0000334, and FBbt:00007513 + FBbt:00005725
biological sample (D. persimilis female)	Dper female viscera replicate 3	NCBI GEO; This paper	NCBI GEO:GSE99574	FlyBase CV:FBbt:00003004, FBcv:0000334, and FBbt:00007513 + FBbt:00005725
biological sample (D. persimilis female)	Dper female viscera replicate 4	NCBI GEO; This paper	NCBI GEO:GSE99574	FlyBase CV:FBbt:00003004, FBcv:0000334, and FBbt:00007513 + FBbt:00005725
biological sample (D. persimilis female)	Dper female gonad replicate 1	NCBI GEO; This paper	NCBI GEO:GSE99574	FlyBase CV:FBbt:00003004, FBcv:0000334, and FBbt:00004858
biological sample (D. persimilis female)	Dper female gonad replicate 2	NCBI GEO; This paper	NCBI GEO:GSE99574	FlyBase CV:FBbt:00003004, FBcv:0000334, and FBbt:00004858
biological sample (D. persimilis female)	Dper female gonad replicate 3	NCBI GEO; This paper	NCBI GEO:GSE99574	FlyBase CV:FBbt:00003004, FBcv:0000334, and FBbt:00004858
biological sample (D. persimilis female)	Dper female gonad replicate 4	NCBI GEO; This paper	NCBI GEO:GSE99574	FlyBase CV:FBbt:00003004, FBcv:0000334, and FBbt:00004858
biological sample (D. persimilis female)	Dper female head replicate 1	NCBI GEO; This paper	NCBI GEO:GSE99574	FlyBase CV:FBbt:00003004, FBcv:0000334, and FBbt:00000004
biological sample (D. persimilis female)	Dper female head replicate 2	NCBI GEO; This paper	NCBI GEO:GSE99574	FlyBase CV:FBbt:00003004, FBcv:0000334, and FBbt:00000004
biological sample (D. persimilis female)	Dper female head replicate 3	NCBI GEO; This paper	NCBI GEO:GSE99574	FlyBase CV:FBbt:00003004, FBcv:0000334, and FBbt:00000004
biological sample (D. persimilis female)	Dper female head replicate 4	NCBI GEO; This paper	NCBI GEO:GSE99574	FlyBase CV:FBbt:00003004, FBcv:0000334, and FBbt:00000004
biological sample (D. persimilis female)	Dper female reproductive tract replicate 1	NCBI GEO; This paper	NCBI GEO:GSE99574	FlyBase CV:FBbt:00003004, FBcv:0000334, and FBbt:00004857 - FBbt:00004858 + FBbt:00004829
biological sample (D. persimilis female)	Dper female reproductive tract replicate 2	NCBI GEO; This paper	NCBI GEO:GSE99574	FlyBase CV:FBbt:00003004, FBcv:0000334, and FBbt:00004857 - FBbt:00004858 + FBbt:00004829
biological sample (D. persimilis female)	Dper female reproductive tract replicate 3	NCBI GEO; This paper	NCBI GEO:GSE99574	FlyBase CV:FBbt:00003004, FBcv:0000334, and FBbt:00004857 - FBbt:00004858 + FBbt:00004829
biological sample (D. persimilis female)	Dper female reproductive tract replicate 4	NCBI GEO; This paper	NCBI GEO:GSE99574	FlyBase CV:FBbt:00003004, FBcv:0000334, and FBbt:00004857 - FBbt:00004858 + FBbt:00004829
biological sample (D. persimilis female)	Dper female thorax replicate 1	NCBI GEO; This paper	NCBI GEO:GSE99574	FlyBase CV:FBbt:00003004, FBcv:0000334, and FBbt:00000015 - FBbt:00007513
biological sample (D. persimilis female)	Dper female thorax replicate 2	NCBI GEO; This paper	NCBI GEO:GSE99574	FlyBase CV:FBbt:00003004, FBcv:0000334, and FBbt:00000015 - FBbt:00007513
biological sample (D. persimilis female)	Dper female thorax replicate 3	NCBI GEO; This paper	NCBI GEO:GSE99574	FlyBase CV:FBbt:00003004, FBcv:0000334, and FBbt:00000015 - FBbt:00007513
biological sample (D. persimilis female)	Dper female thorax replicate 4	NCBI GEO; This paper	NCBI GEO:GSE99574	FlyBase CV:FBbt:00003004, FBcv:0000334, and FBbt:00000015 - FBbt:00007513
biological sample (D. persimilis female)	Dper female whole organism replicate 1	NCBI GEO; This paper	NCBI GEO:GSE99574	FlyBase CV:FBbt:00003004, FBcv:0000334, and FBbt:00000001
biological sample (D. persimilis female)	Dper female whole organism replicate 2	NCBI GEO; This paper	NCBI GEO:GSE99574	FlyBase CV:FBbt:00003004, FBcv:0000334, and FBbt:00000001
biological sample (D. persimilis female)	Dper female whole organism replicate 3	NCBI GEO; This paper	NCBI GEO:GSE99574	FlyBase CV:FBbt:00003004, FBcv:0000334, and FBbt:00000001
biological sample (D. persimilis female)	Dper female whole organism replicate 4	NCBI GEO; This paper	NCBI GEO:GSE99574	FlyBase CV:FBbt:00003004, FBcv:0000334, and FBbt:00000001
biological sample (D. persimilis male)	Dper male abdomen replicate 1	NCBI GEO; This paper	NCBI GEO:GSE99574	FlyBase CV:FBbt:00003004, FBcv:0000333, and FBbt:00000020 - FBbt:00007513 - FBbt:00005725
biological sample (D. persimilis male)	Dper male abdomen replicate 2	NCBI GEO; This paper	NCBI GEO:GSE99574	FlyBase CV:FBbt:00003004, FBcv:0000333, and FBbt:00000020 - FBbt:00007513 - FBbt:00005725
biological sample (D. persimilis male)	Dper male abdomen replicate 3	NCBI GEO; This paper	NCBI GEO:GSE99574	FlyBase CV:FBbt:00003004, FBcv:0000333, and FBbt:00000020 - FBbt:00007513 - FBbt:00005725
biological sample (D. persimilis male)	Dper male abdomen replicate 4	NCBI GEO; This paper	NCBI GEO:GSE99574	FlyBase CV:FBbt:00003004, FBcv:0000333, and FBbt:00000020 - FBbt:00007513 - FBbt:00005725
biological sample (D. persimilis male)	Dper male viscera replicate 1	NCBI GEO; This paper	NCBI GEO:GSE99574	FlyBase CV:FBbt:00003004, FBcv:0000333, and FBbt:00007513 + FBbt:00005725
biological sample (D. persimilis male)	Dper male viscera replicate 2	NCBI GEO; This paper	NCBI GEO:GSE99574	FlyBase CV:FBbt:00003004, FBcv:0000333, and FBbt:00007513 + FBbt:00005725
biological sample (D. persimilis male)	Dper male viscera replicate 3	NCBI GEO; This paper	NCBI GEO:GSE99574	FlyBase CV:FBbt:00003004, FBcv:0000333, and FBbt:00007513 + FBbt:00005725
biological sample (D. persimilis male)	Dper male viscera replicate 4	NCBI GEO; This paper	NCBI GEO:GSE99574	FlyBase CV:FBbt:00003004, FBcv:0000333, and FBbt:00007513 + FBbt:00005725
biological sample (D. persimilis male)	Dper male gonad replicate 1	NCBI GEO; This paper	NCBI GEO:GSE99574	FlyBase CV:FBbt:00003004, FBcv:0000333, and FBbt:00004858
biological sample (D. persimilis male)	Dper male gonad replicate 2	NCBI GEO; This paper	NCBI GEO:GSE99574	FlyBase CV:FBbt:00003004, FBcv:0000333, and FBbt:00004858
biological sample (D. persimilis male)	Dper male gonad replicate 3	NCBI GEO; This paper	NCBI GEO:GSE99574	FlyBase CV:FBbt:00003004, FBcv:0000333, and FBbt:00004858
biological sample (D. persimilis male)	Dper male gonad replicate 4	NCBI GEO; This paper	NCBI GEO:GSE99574	FlyBase CV:FBbt:00003004, FBcv:0000333, and FBbt:00004858
biological sample (D. persimilis male)	Dper male head replicate 1	NCBI GEO; This paper	NCBI GEO:GSE99574	FlyBase CV:FBbt:00003004, FBcv:0000333, and FBbt:00000004
biological sample (D. persimilis male)	Dper male head replicate 2	NCBI GEO; This paper	NCBI GEO:GSE99574	FlyBase CV:FBbt:00003004, FBcv:0000333, and FBbt:00000004
biological sample (D. persimilis male)	Dper male head replicate 3	NCBI GEO; This paper	NCBI GEO:GSE99574	FlyBase CV:FBbt:00003004, FBcv:0000333, and FBbt:00000004
biological sample (D. persimilis male)	Dper male head replicate 4	NCBI GEO; This paper	NCBI GEO:GSE99574	FlyBase CV:FBbt:00003004, FBcv:0000333, and FBbt:00000004
biological sample (D. persimilis male)	Dper male reproductive tract replicate 1	NCBI GEO; This paper	NCBI GEO:GSE99574	FlyBase CV:FBbt:00003004, FBcv:0000333, and FBbt:00004857 - FBbt:00004858 + FBbt:00004829
biological sample (D. persimilis male)	Dper male reproductive tract replicate 2	NCBI GEO; This paper	NCBI GEO:GSE99574	FlyBase CV:FBbt:00003004, FBcv:0000333, and FBbt:00004857 - FBbt:00004858 + FBbt:00004829
biological sample (D. persimilis male)	Dper male reproductive tract replicate 3	NCBI GEO; This paper	NCBI GEO:GSE99574	FlyBase CV:FBbt:00003004, FBcv:0000333, and FBbt:00004857 - FBbt:00004858 + FBbt:00004829
biological sample (D. persimilis male)	Dper male reproductive tract replicate 4	NCBI GEO; This paper	NCBI GEO:GSE99574	FlyBase CV:FBbt:00003004, FBcv:0000333, and FBbt:00004857 - FBbt:00004858 + FBbt:00004829
biological sample (D. persimilis male)	Dper male thorax replicate 1	NCBI GEO; This paper	NCBI GEO:GSE99574	FlyBase CV:FBbt:00003004, FBcv:0000333, and FBbt:00000015 - FBbt:00007513
biological sample (D. persimilis male)	Dper male thorax replicate 2	NCBI GEO; This paper	NCBI GEO:GSE99574	FlyBase CV:FBbt:00003004, FBcv:0000333, and FBbt:00000015 - FBbt:00007513
biological sample (D. persimilis male)	Dper male thorax replicate 3	NCBI GEO; This paper	NCBI GEO:GSE99574	FlyBase CV:FBbt:00003004, FBcv:0000333, and FBbt:00000015 - FBbt:00007513
biological sample (D. persimilis male)	Dper male thorax replicate 4	NCBI GEO; This paper	NCBI GEO:GSE99574	FlyBase CV:FBbt:00003004, FBcv:0000333, and FBbt:00000015 - FBbt:00007513
biological sample (D. persimilis male)	Dper male whole organism replicate 1	NCBI GEO; This paper	NCBI GEO:GSE99574	FlyBase CV:FBbt:00003004, FBcv:0000333, and FBbt:00000001
biological sample (D. persimilis male)	Dper male whole organism replicate 2	NCBI GEO; This paper	NCBI GEO:GSE99574	FlyBase CV:FBbt:00003004, FBcv:0000333, and FBbt:00000001
biological sample (D. persimilis male)	Dper male whole organism replicate 3	NCBI GEO; This paper	NCBI GEO:GSE99574	FlyBase CV:FBbt:00003004, FBcv:0000333, and FBbt:00000001
biological sample (D. persimilis male)	Dper male whole organism replicate 4	NCBI GEO; This paper	NCBI GEO:GSE99574	FlyBase CV:FBbt:00003004, FBcv:0000333, and FBbt:00000001
biological sample (D. pseudoobscura female)	Dpse female abdomen replicate 1	NCBI GEO; This paper	NCBI GEO:GSE99574	FlyBase CV:FBbt:00003004, FBcv:0000334, and FBbt:00000020 - FBbt:00007513 - FBbt:00005725
biological sample (D. pseudoobscura female)	Dpse female abdomen replicate 2	NCBI GEO; This paper	NCBI GEO:GSE99574	FlyBase CV:FBbt:00003004, FBcv:0000334, and FBbt:00000020 - FBbt:00007513 - FBbt:00005725
biological sample (D. pseudoobscura female)	Dpse female abdomen replicate 3	NCBI GEO; This paper	NCBI GEO:GSE99574	FlyBase CV:FBbt:00003004, FBcv:0000334, and FBbt:00000020 - FBbt:00007513 - FBbt:00005725
biological sample (D. pseudoobscura female)	Dpse female abdomen replicate 4	NCBI GEO; This paper	NCBI GEO:GSE99574	FlyBase CV:FBbt:00003004, FBcv:0000334, and FBbt:00000020 - FBbt:00007513 - FBbt:00005725
biological sample (D. pseudoobscura female)	Dpse female viscera replicate 1	NCBI GEO; This paper	NCBI GEO:GSE99574	FlyBase CV:FBbt:00003004, FBcv:0000334, and FBbt:00007513 + FBbt:00005725
biological sample (D. pseudoobscura female)	Dpse female viscera replicate 2	NCBI GEO; This paper	NCBI GEO:GSE99574	FlyBase CV:FBbt:00003004, FBcv:0000334, and FBbt:00007513 + FBbt:00005725
biological sample (D. pseudoobscura female)	Dpse female viscera replicate 3	NCBI GEO; This paper	NCBI GEO:GSE99574	FlyBase CV:FBbt:00003004, FBcv:0000334, and FBbt:00007513 + FBbt:00005725
biological sample (D. pseudoobscura female)	Dpse female viscera replicate 4	NCBI GEO; This paper	NCBI GEO:GSE99574	FlyBase CV:FBbt:00003004, FBcv:0000334, and FBbt:00007513 + FBbt:00005725
biological sample (D. pseudoobscura female)	Dpse female gonad replicate 1	NCBI GEO; This paper	NCBI GEO:GSE99574	FlyBase CV:FBbt:00003004, FBcv:0000334, and FBbt:00004858
biological sample (D. pseudoobscura female)	Dpse female gonad replicate 2	NCBI GEO; This paper	NCBI GEO:GSE99574	FlyBase CV:FBbt:00003004, FBcv:0000334, and FBbt:00004858
biological sample (D. pseudoobscura female)	Dpse female gonad replicate 3	NCBI GEO; This paper	NCBI GEO:GSE99574	FlyBase CV:FBbt:00003004, FBcv:0000334, and FBbt:00004858
biological sample (D. pseudoobscura female)	Dpse female gonad replicate 4	NCBI GEO; This paper	NCBI GEO:GSE99574	FlyBase CV:FBbt:00003004, FBcv:0000334, and FBbt:00004858
biological sample (D. pseudoobscura female)	Dpse female head replicate 1	NCBI GEO; This paper	NCBI GEO:GSE99574	FlyBase CV:FBbt:00003004, FBcv:0000334, and FBbt:00000004
biological sample (D. pseudoobscura female)	Dpse female head replicate 2	NCBI GEO; This paper	NCBI GEO:GSE99574	FlyBase CV:FBbt:00003004, FBcv:0000334, and FBbt:00000004
biological sample (D. pseudoobscura female)	Dpse female head replicate 3	NCBI GEO; This paper	NCBI GEO:GSE99574	FlyBase CV:FBbt:00003004, FBcv:0000334, and FBbt:00000004
biological sample (D. pseudoobscura female)	Dpse female head replicate 4	NCBI GEO; This paper	NCBI GEO:GSE99574	FlyBase CV:FBbt:00003004, FBcv:0000334, and FBbt:00000004
biological sample (D. pseudoobscura female)	Dpse female reproductive tract replicate 1	NCBI GEO; This paper	NCBI GEO:GSE99574	FlyBase CV:FBbt:00003004, FBcv:0000334, and FBbt:00004857 - FBbt:00004858 + FBbt:00004829
biological sample (D. pseudoobscura female)	Dpse female reproductive tract replicate 2	NCBI GEO; This paper	NCBI GEO:GSE99574	FlyBase CV:FBbt:00003004, FBcv:0000334, and FBbt:00004857 - FBbt:00004858 + FBbt:00004829
biological sample (D. pseudoobscura female)	Dpse female reproductive tract replicate 3	NCBI GEO; This paper	NCBI GEO:GSE99574	FlyBase CV:FBbt:00003004, FBcv:0000334, and FBbt:00004857 - FBbt:00004858 + FBbt:00004829
biological sample (D. pseudoobscura female)	Dpse female reproductive tract replicate 4	NCBI GEO; This paper	NCBI GEO:GSE99574	FlyBase CV:FBbt:00003004, FBcv:0000334, and FBbt:00004857 - FBbt:00004858 + FBbt:00004829
biological sample (D. pseudoobscura female)	Dpse female thorax replicate 1	NCBI GEO; This paper	NCBI GEO:GSE99574	FlyBase CV:FBbt:00003004, FBcv:0000334, and FBbt:00000015 - FBbt:00007513
biological sample (D. pseudoobscura female)	Dpse female thorax replicate 2	NCBI GEO; This paper	NCBI GEO:GSE99574	FlyBase CV:FBbt:00003004, FBcv:0000334, and FBbt:00000015 - FBbt:00007513
biological sample (D. pseudoobscura female)	Dpse female thorax replicate 3	NCBI GEO; This paper	NCBI GEO:GSE99574	FlyBase CV:FBbt:00003004, FBcv:0000334, and FBbt:00000015 - FBbt:00007513
biological sample (D. pseudoobscura female)	Dpse female thorax replicate 4	NCBI GEO; This paper	NCBI GEO:GSE99574	FlyBase CV:FBbt:00003004, FBcv:0000334, and FBbt:00000015 - FBbt:00007513
biological sample (D. pseudoobscura female)	Dpse female whole organism replicate 1	NCBI GEO; This paper	NCBI GEO:GSE99574	FlyBase CV:FBbt:00003004, FBcv:0000334, and FBbt:00000001
biological sample (D. pseudoobscura female)	Dpse female whole organism replicate 2	NCBI GEO; This paper	NCBI GEO:GSE99574	FlyBase CV:FBbt:00003004, FBcv:0000334, and FBbt:00000001
biological sample (D. pseudoobscura female)	Dpse female whole organism replicate 3	NCBI GEO; This paper	NCBI GEO:GSE99574	FlyBase CV:FBbt:00003004, FBcv:0000334, and FBbt:00000001
biological sample (D. pseudoobscura female)	Dpse female whole organism replicate 4	NCBI GEO; This paper	NCBI GEO:GSE99574	FlyBase CV:FBbt:00003004, FBcv:0000334, and FBbt:00000001
biological sample (D. pseudoobscura male)	Dpse male abdomen replicate 1	NCBI GEO; This paper	NCBI GEO:GSE99574	FlyBase CV:FBbt:00003004, FBcv:0000333, and FBbt:00000020 - FBbt:00007513 - FBbt:00005725
biological sample (D. pseudoobscura male)	Dpse male abdomen replicate 2	NCBI GEO; This paper	NCBI GEO:GSE99574	FlyBase CV:FBbt:00003004, FBcv:0000333, and FBbt:00000020 - FBbt:00007513 - FBbt:00005725
biological sample (D. pseudoobscura male)	Dpse male abdomen replicate 3	NCBI GEO; This paper	NCBI GEO:GSE99574	FlyBase CV:FBbt:00003004, FBcv:0000333, and FBbt:00000020 - FBbt:00007513 - FBbt:00005725
biological sample (D. pseudoobscura male)	Dpse male abdomen replicate 4	NCBI GEO; This paper	NCBI GEO:GSE99574	FlyBase CV:FBbt:00003004, FBcv:0000333, and FBbt:00000020 - FBbt:00007513 - FBbt:00005725
biological sample (D. pseudoobscura male)	Dpse male viscera replicate 1	NCBI GEO; This paper	NCBI GEO:GSE99574	FlyBase CV:FBbt:00003004, FBcv:0000333, and FBbt:00007513 + FBbt:00005725
biological sample (D. pseudoobscura male)	Dpse male viscera replicate 2	NCBI GEO; This paper	NCBI GEO:GSE99574	FlyBase CV:FBbt:00003004, FBcv:0000333, and FBbt:00007513 + FBbt:00005725
biological sample (D. pseudoobscura male)	Dpse male viscera replicate 3	NCBI GEO; This paper	NCBI GEO:GSE99574	FlyBase CV:FBbt:00003004, FBcv:0000333, and FBbt:00007513 + FBbt:00005725
biological sample (D. pseudoobscura male)	Dpse male viscera replicate 4	NCBI GEO; This paper	NCBI GEO:GSE99574	FlyBase CV:FBbt:00003004, FBcv:0000333, and FBbt:00007513 + FBbt:00005725
biological sample (D. pseudoobscura male)	Dpse male gonad replicate 1	NCBI GEO; This paper	NCBI GEO:GSE99574	FlyBase CV:FBbt:00003004, FBcv:0000333, and FBbt:00004858
biological sample (D. pseudoobscura male)	Dpse male gonad replicate 2	NCBI GEO; This paper	NCBI GEO:GSE99574	FlyBase CV:FBbt:00003004, FBcv:0000333, and FBbt:00004858
biological sample (D. pseudoobscura male)	Dpse male gonad replicate 3	NCBI GEO; This paper	NCBI GEO:GSE99574	FlyBase CV:FBbt:00003004, FBcv:0000333, and FBbt:00004858
biological sample (D. pseudoobscura male)	Dpse male gonad replicate 4	NCBI GEO; This paper	NCBI GEO:GSE99574	FlyBase CV:FBbt:00003004, FBcv:0000333, and FBbt:00004858
biological sample (D. pseudoobscura male)	Dpse male head replicate 1	NCBI GEO; This paper	NCBI GEO:GSE99574	FlyBase CV:FBbt:00003004, FBcv:0000333, and FBbt:00000004
biological sample (D. pseudoobscura male)	Dpse male head replicate 2	NCBI GEO; This paper	NCBI GEO:GSE99574	FlyBase CV:FBbt:00003004, FBcv:0000333, and FBbt:00000004
biological sample (D. pseudoobscura male)	Dpse male head replicate 3	NCBI GEO; This paper	NCBI GEO:GSE99574	FlyBase CV:FBbt:00003004, FBcv:0000333, and FBbt:00000004
biological sample (D. pseudoobscura male)	Dpse male head replicate 4	NCBI GEO; This paper	NCBI GEO:GSE99574	FlyBase CV:FBbt:00003004, FBcv:0000333, and FBbt:00000004
biological sample (D. pseudoobscura male)	Dpse male reproductive tract replicate 1	NCBI GEO; This paper	NCBI GEO:GSE99574	FlyBase CV:FBbt:00003004, FBcv:0000333, and FBbt:00004857 - FBbt:00004858 + FBbt:00004829
biological sample (D. pseudoobscura male)	Dpse male reproductive tract replicate 2	NCBI GEO; This paper	NCBI GEO:GSE99574	FlyBase CV:FBbt:00003004, FBcv:0000333, and FBbt:00004857 - FBbt:00004858 + FBbt:00004829
biological sample (D. pseudoobscura male)	Dpse male reproductive tract replicate 3	NCBI GEO; This paper	NCBI GEO:GSE99574	FlyBase CV:FBbt:00003004, FBcv:0000333, and FBbt:00004857 - FBbt:00004858 + FBbt:00004829
biological sample (D. pseudoobscura male)	Dpse male reproductive tract replicate 4	NCBI GEO; This paper	NCBI GEO:GSE99574	FlyBase CV:FBbt:00003004, FBcv:0000333, and FBbt:00004857 - FBbt:00004858 + FBbt:00004829
biological sample (D. pseudoobscura male)	Dpse male thorax replicate 1	NCBI GEO; This paper	NCBI GEO:GSE99574	FlyBase CV:FBbt:00003004, FBcv:0000333, and FBbt:00000015 - FBbt:00007513
biological sample (D. pseudoobscura male)	Dpse male thorax replicate 2	NCBI GEO; This paper	NCBI GEO:GSE99574	FlyBase CV:FBbt:00003004, FBcv:0000333, and FBbt:00000015 - FBbt:00007513
biological sample (D. pseudoobscura male)	Dpse male thorax replicate 3	NCBI GEO; This paper	NCBI GEO:GSE99574	FlyBase CV:FBbt:00003004, FBcv:0000333, and FBbt:00000015 - FBbt:00007513
biological sample (D. pseudoobscura male)	Dpse male thorax replicate 4	NCBI GEO; This paper	NCBI GEO:GSE99574	FlyBase CV:FBbt:00003004, FBcv:0000333, and FBbt:00000015 - FBbt:00007513
biological sample (D. pseudoobscura male)	Dpse male whole organism replicate 1	NCBI GEO; This paper	NCBI GEO:GSE99574	FlyBase CV:FBbt:00003004, FBcv:0000333, and FBbt:00000001
biological sample (D. pseudoobscura male)	Dpse male whole organism replicate 2	NCBI GEO; This paper	NCBI GEO:GSE99574	FlyBase CV:FBbt:00003004, FBcv:0000333, and FBbt:00000001
biological sample (D. pseudoobscura male)	Dpse male whole organism replicate 3	NCBI GEO; This paper	NCBI GEO:GSE99574	FlyBase CV:FBbt:00003004, FBcv:0000333, and FBbt:00000001
biological sample (D. pseudoobscura male)	Dpse male whole organism replicate 4	NCBI GEO; This paper	NCBI GEO:GSE99574	FlyBase CV:FBbt:00003004, FBcv:0000333, and FBbt:00000001
biological sample (D. virilis female)	Dvir female abdomen replicate 1	NCBI GEO; This paper	NCBI GEO:GSE99574	FlyBase CV:FBbt:00003004, FBcv:0000334, and FBbt:00000020 - FBbt:00007513 - FBbt:00005725
biological sample (D. virilis female)	Dvir female abdomen replicate 2	NCBI GEO; This paper	NCBI GEO:GSE99574	FlyBase CV:FBbt:00003004, FBcv:0000334, and FBbt:00000020 - FBbt:00007513 - FBbt:00005725
biological sample (D. virilis female)	Dvir female abdomen replicate 3	NCBI GEO; This paper	NCBI GEO:GSE99574	FlyBase CV:FBbt:00003004, FBcv:0000334, and FBbt:00000020 - FBbt:00007513 - FBbt:00005725
biological sample (D. virilis female)	Dvir female abdomen replicate 4	NCBI GEO; This paper	NCBI GEO:GSE99574	FlyBase CV:FBbt:00003004, FBcv:0000334, and FBbt:00000020 - FBbt:00007513 - FBbt:00005725
biological sample (D. virilis female)	Dvir female viscera replicate 1	NCBI GEO; This paper	NCBI GEO:GSE99574	FlyBase CV:FBbt:00003004, FBcv:0000334, and FBbt:00007513 + FBbt:00005725
biological sample (D. virilis female)	Dvir female viscera replicate 2	NCBI GEO; This paper	NCBI GEO:GSE99574	FlyBase CV:FBbt:00003004, FBcv:0000334, and FBbt:00007513 + FBbt:00005725
biological sample (D. virilis female)	Dvir female viscera replicate 3	NCBI GEO; This paper	NCBI GEO:GSE99574	FlyBase CV:FBbt:00003004, FBcv:0000334, and FBbt:00007513 + FBbt:00005725
biological sample (D. virilis female)	Dvir female viscera replicate 4	NCBI GEO; This paper	NCBI GEO:GSE99574	FlyBase CV:FBbt:00003004, FBcv:0000334, and FBbt:00007513 + FBbt:00005725
biological sample (D. virilis female)	Dvir female gonad replicate 1	NCBI GEO; This paper	NCBI GEO:GSE99574	FlyBase CV:FBbt:00003004, FBcv:0000334, and FBbt:00004858
biological sample (D. virilis female)	Dvir female gonad replicate 2	NCBI GEO; This paper	NCBI GEO:GSE99574	FlyBase CV:FBbt:00003004, FBcv:0000334, and FBbt:00004858
biological sample (D. virilis female)	Dvir female gonad replicate 3	NCBI GEO; This paper	NCBI GEO:GSE99574	FlyBase CV:FBbt:00003004, FBcv:0000334, and FBbt:00004858
biological sample (D. virilis female)	Dvir female gonad replicate 4	NCBI GEO; This paper	NCBI GEO:GSE99574	FlyBase CV:FBbt:00003004, FBcv:0000334, and FBbt:00004858
biological sample (D. virilis female)	Dvir female head replicate 1	NCBI GEO; This paper	NCBI GEO:GSE99574	FlyBase CV:FBbt:00003004, FBcv:0000334, and FBbt:00000004
biological sample (D. virilis female)	Dvir female head replicate 2	NCBI GEO; This paper	NCBI GEO:GSE99574	FlyBase CV:FBbt:00003004, FBcv:0000334, and FBbt:00000004
biological sample (D. virilis female)	Dvir female head replicate 3	NCBI GEO; This paper	NCBI GEO:GSE99574	FlyBase CV:FBbt:00003004, FBcv:0000334, and FBbt:00000004
biological sample (D. virilis female)	Dvir female head replicate 4	NCBI GEO; This paper	NCBI GEO:GSE99574	FlyBase CV:FBbt:00003004, FBcv:0000334, and FBbt:00000004
biological sample (D. virilis female)	Dvir female reproductive tract replicate 1	NCBI GEO; This paper	NCBI GEO:GSE99574	FlyBase CV:FBbt:00003004, FBcv:0000334, and FBbt:00004857 - FBbt:00004858 + FBbt:00004829
biological sample (D. virilis female)	Dvir female reproductive tract replicate 2	NCBI GEO; This paper	NCBI GEO:GSE99574	FlyBase CV:FBbt:00003004, FBcv:0000334, and FBbt:00004857 - FBbt:00004858 + FBbt:00004829
biological sample (D. virilis female)	Dvir female reproductive tract replicate 3	NCBI GEO; This paper	NCBI GEO:GSE99574	FlyBase CV:FBbt:00003004, FBcv:0000334, and FBbt:00004857 - FBbt:00004858 + FBbt:00004829
biological sample (D. virilis female)	Dvir female reproductive tract replicate 4	NCBI GEO; This paper	NCBI GEO:GSE99574	FlyBase CV:FBbt:00003004, FBcv:0000334, and FBbt:00004857 - FBbt:00004858 + FBbt:00004829
biological sample (D. virilis female)	Dvir female thorax replicate 1	NCBI GEO; This paper	NCBI GEO:GSE99574	FlyBase CV:FBbt:00003004, FBcv:0000334, and FBbt:00000015 - FBbt:00007513
biological sample (D. virilis female)	Dvir female thorax replicate 2	NCBI GEO; This paper	NCBI GEO:GSE99574	FlyBase CV:FBbt:00003004, FBcv:0000334, and FBbt:00000015 - FBbt:00007513
biological sample (D. virilis female)	Dvir female thorax replicate 3	NCBI GEO; This paper	NCBI GEO:GSE99574	FlyBase CV:FBbt:00003004, FBcv:0000334, and FBbt:00000015 - FBbt:00007513
biological sample (D. virilis female)	Dvir female thorax replicate 4	NCBI GEO; This paper	NCBI GEO:GSE99574	FlyBase CV:FBbt:00003004, FBcv:0000334, and FBbt:00000015 - FBbt:00007513
biological sample (D. virilis female)	Dvir female whole organism replicate 1	NCBI GEO; This paper	NCBI GEO:GSE99574	FlyBase CV:FBbt:00003004, FBcv:0000334, and FBbt:00000001
biological sample (D. virilis female)	Dvir female whole organism replicate 2	NCBI GEO; This paper	NCBI GEO:GSE99574	FlyBase CV:FBbt:00003004, FBcv:0000334, and FBbt:00000001
biological sample (D. virilis female)	Dvir female whole organism replicate 3	NCBI GEO; This paper	NCBI GEO:GSE99574	FlyBase CV:FBbt:00003004, FBcv:0000334, and FBbt:00000001
biological sample (D. virilis female)	Dvir female whole organism replicate 4	NCBI GEO; This paper	NCBI GEO:GSE99574	FlyBase CV:FBbt:00003004, FBcv:0000334, and FBbt:00000001
biological sample (D. virilis male)	Dvir male abdomen replicate 1	NCBI GEO; This paper	NCBI GEO:GSE99574	FlyBase CV:FBbt:00003004, FBcv:0000333, and FBbt:00000020 - FBbt:00007513 - FBbt:00005725
biological sample (D. virilis male)	Dvir male abdomen replicate 2	NCBI GEO; This paper	NCBI GEO:GSE99574	FlyBase CV:FBbt:00003004, FBcv:0000333, and FBbt:00000020 - FBbt:00007513 - FBbt:00005725
biological sample (D. virilis male)	Dvir male abdomen replicate 3	NCBI GEO; This paper	NCBI GEO:GSE99574	FlyBase CV:FBbt:00003004, FBcv:0000333, and FBbt:00000020 - FBbt:00007513 - FBbt:00005725
biological sample (D. virilis male)	Dvir male abdomen replicate 4	NCBI GEO; This paper	NCBI GEO:GSE99574	FlyBase CV:FBbt:00003004, FBcv:0000333, and FBbt:00000020 - FBbt:00007513 - FBbt:00005725
biological sample (D. virilis male)	Dvir male viscera replicate 1	NCBI GEO; This paper	NCBI GEO:GSE99574	FlyBase CV:FBbt:00003004, FBcv:0000333, and FBbt:00007513 + FBbt:00005725
biological sample (D. virilis male)	Dvir male viscera replicate 2	NCBI GEO; This paper	NCBI GEO:GSE99574	FlyBase CV:FBbt:00003004, FBcv:0000333, and FBbt:00007513 + FBbt:00005725
biological sample (D. virilis male)	Dvir male viscera replicate 3	NCBI GEO; This paper	NCBI GEO:GSE99574	FlyBase CV:FBbt:00003004, FBcv:0000333, and FBbt:00007513 + FBbt:00005725
biological sample (D. virilis male)	Dvir male viscera replicate 4	NCBI GEO; This paper	NCBI GEO:GSE99574	FlyBase CV:FBbt:00003004, FBcv:0000333, and FBbt:00007513 + FBbt:00005725
biological sample (D. virilis male)	Dvir male gonad replicate 1	NCBI GEO; This paper	NCBI GEO:GSE99574	FlyBase CV:FBbt:00003004, FBcv:0000333, and FBbt:00004858
biological sample (D. virilis male)	Dvir male gonad replicate 2	NCBI GEO; This paper	NCBI GEO:GSE99574	FlyBase CV:FBbt:00003004, FBcv:0000333, and FBbt:00004858
biological sample (D. virilis male)	Dvir male gonad replicate 3	NCBI GEO; This paper	NCBI GEO:GSE99574	FlyBase CV:FBbt:00003004, FBcv:0000333, and FBbt:00004858
biological sample (D. virilis male)	Dvir male gonad replicate 4	NCBI GEO; This paper	NCBI GEO:GSE99574	FlyBase CV:FBbt:00003004, FBcv:0000333, and FBbt:00004858
biological sample (D. virilis male)	Dvir male head replicate 1	NCBI GEO; This paper	NCBI GEO:GSE99574	FlyBase CV:FBbt:00003004, FBcv:0000333, and FBbt:00000004
biological sample (D. virilis male)	Dvir male head replicate 2	NCBI GEO; This paper	NCBI GEO:GSE99574	FlyBase CV:FBbt:00003004, FBcv:0000333, and FBbt:00000004
biological sample (D. virilis male)	Dvir male head replicate 3	NCBI GEO; This paper	NCBI GEO:GSE99574	FlyBase CV:FBbt:00003004, FBcv:0000333, and FBbt:00000004
biological sample (D. virilis male)	Dvir male head replicate 4	NCBI GEO; This paper	NCBI GEO:GSE99574	FlyBase CV:FBbt:00003004, FBcv:0000333, and FBbt:00000004
biological sample (D. virilis male)	Dvir male reproductive tract replicate 1	NCBI GEO; This paper	NCBI GEO:GSE99574	FlyBase CV:FBbt:00003004, FBcv:0000333, and FBbt:00004857 - FBbt:00004858 + FBbt:00004829
biological sample (D. virilis male)	Dvir male reproductive tract replicate 2	NCBI GEO; This paper	NCBI GEO:GSE99574	FlyBase CV:FBbt:00003004, FBcv:0000333, and FBbt:00004857 - FBbt:00004858 + FBbt:00004829
biological sample (D. virilis male)	Dvir male reproductive tract replicate 3	NCBI GEO; This paper	NCBI GEO:GSE99574	FlyBase CV:FBbt:00003004, FBcv:0000333, and FBbt:00004857 - FBbt:00004858 + FBbt:00004829
biological sample (D. virilis male)	Dvir male reproductive tract replicate 4	NCBI GEO; This paper	NCBI GEO:GSE99574	FlyBase CV:FBbt:00003004, FBcv:0000333, and FBbt:00004857 - FBbt:00004858 + FBbt:00004829
biological sample (D. virilis male)	Dvir male thorax replicate 1	NCBI GEO; This paper	NCBI GEO:GSE99574	FlyBase CV:FBbt:00003004, FBcv:0000333, and FBbt:00000015 - FBbt:00007513
biological sample (D. virilis male)	Dvir male thorax replicate 2	NCBI GEO; This paper	NCBI GEO:GSE99574	FlyBase CV:FBbt:00003004, FBcv:0000333, and FBbt:00000015 - FBbt:00007513
biological sample (D. virilis male)	Dvir male thorax replicate 3	NCBI GEO; This paper	NCBI GEO:GSE99574	FlyBase CV:FBbt:00003004, FBcv:0000333, and FBbt:00000015 - FBbt:00007513
biological sample (D. virilis male)	Dvir male thorax replicate 4	NCBI GEO; This paper	NCBI GEO:GSE99574	FlyBase CV:FBbt:00003004, FBcv:0000333, and FBbt:00000015 - FBbt:00007513
biological sample (D. virilis male)	Dvir male whole organism replicate 1	NCBI GEO; This paper	NCBI GEO:GSE99574	FlyBase CV:FBbt:00003004, FBcv:0000333, and FBbt:00000001
biological sample (D. virilis male)	Dvir male whole organism replicate 2	NCBI GEO; This paper	NCBI GEO:GSE99574	FlyBase CV:FBbt:00003004, FBcv:0000333, and FBbt:00000001
biological sample (D. virilis male)	Dvir male whole organism replicate 3	NCBI GEO; This paper	NCBI GEO:GSE99574	FlyBase CV:FBbt:00003004, FBcv:0000333, and FBbt:00000001
biological sample (D. virilis male)	Dvir male whole organism replicate 4	NCBI GEO; This paper	NCBI GEO:GSE99574	FlyBase CV:FBbt:00003004, FBcv:0000333, and FBbt:00000001
biological sample (D. willistoni female)	Dwil female abdomen replicate 1	NCBI GEO; This paper	NCBI GEO:GSE99574	FlyBase CV:FBbt:00003004, FBcv:0000334, and FBbt:00000020 - FBbt:00007513 - FBbt:00005725
biological sample (D. willistoni female)	Dwil female abdomen replicate 2	NCBI GEO; This paper	NCBI GEO:GSE99574	FlyBase CV:FBbt:00003004, FBcv:0000334, and FBbt:00000020 - FBbt:00007513 - FBbt:00005725
biological sample (D. willistoni female)	Dwil female abdomen replicate 3	NCBI GEO; This paper	NCBI GEO:GSE99574	FlyBase CV:FBbt:00003004, FBcv:0000334, and FBbt:00000020 - FBbt:00007513 - FBbt:00005725
biological sample (D. willistoni female)	Dwil female abdomen replicate 4	NCBI GEO; This paper	NCBI GEO:GSE99574	FlyBase CV:FBbt:00003004, FBcv:0000334, and FBbt:00000020 - FBbt:00007513 - FBbt:00005725
biological sample (D. willistoni female)	Dwil female viscera replicate 1	NCBI GEO; This paper	NCBI GEO:GSE99574	FlyBase CV:FBbt:00003004, FBcv:0000334, and FBbt:00007513 + FBbt:00005725
biological sample (D. willistoni female)	Dwil female viscera replicate 2	NCBI GEO; This paper	NCBI GEO:GSE99574	FlyBase CV:FBbt:00003004, FBcv:0000334, and FBbt:00007513 + FBbt:00005725
biological sample (D. willistoni female)	Dwil female viscera replicate 3	NCBI GEO; This paper	NCBI GEO:GSE99574	FlyBase CV:FBbt:00003004, FBcv:0000334, and FBbt:00007513 + FBbt:00005725
biological sample (D. willistoni female)	Dwil female viscera replicate 4	NCBI GEO; This paper	NCBI GEO:GSE99574	FlyBase CV:FBbt:00003004, FBcv:0000334, and FBbt:00007513 + FBbt:00005725
biological sample (D. willistoni female)	Dwil female gonad replicate 1	NCBI GEO; This paper	NCBI GEO:GSE99574	FlyBase CV:FBbt:00003004, FBcv:0000334, and FBbt:00004858
biological sample (D. willistoni female)	Dwil female gonad replicate 2	NCBI GEO; This paper	NCBI GEO:GSE99574	FlyBase CV:FBbt:00003004, FBcv:0000334, and FBbt:00004858
biological sample (D. willistoni female)	Dwil female gonad replicate 3	NCBI GEO; This paper	NCBI GEO:GSE99574	FlyBase CV:FBbt:00003004, FBcv:0000334, and FBbt:00004858
biological sample (D. willistoni female)	Dwil female gonad replicate 4	NCBI GEO; This paper	NCBI GEO:GSE99574	FlyBase CV:FBbt:00003004, FBcv:0000334, and FBbt:00004858
biological sample (D. willistoni female)	Dwil female head replicate 1	NCBI GEO; This paper	NCBI GEO:GSE99574	FlyBase CV:FBbt:00003004, FBcv:0000334, and FBbt:00000004
biological sample (D. willistoni female)	Dwil female head replicate 2	NCBI GEO; This paper	NCBI GEO:GSE99574	FlyBase CV:FBbt:00003004, FBcv:0000334, and FBbt:00000004
biological sample (D. willistoni female)	Dwil female head replicate 3	NCBI GEO; This paper	NCBI GEO:GSE99574	FlyBase CV:FBbt:00003004, FBcv:0000334, and FBbt:00000004
biological sample (D. willistoni female)	Dwil female head replicate 4	NCBI GEO; This paper	NCBI GEO:GSE99574	FlyBase CV:FBbt:00003004, FBcv:0000334, and FBbt:00000004
biological sample (D. willistoni female)	Dwil female reproductive tract replicate 1	NCBI GEO; This paper	NCBI GEO:GSE99574	FlyBase CV:FBbt:00003004, FBcv:0000334, and FBbt:00004857 - FBbt:00004858 + FBbt:00004829
biological sample (D. willistoni female)	Dwil female reproductive tract replicate 2	NCBI GEO; This paper	NCBI GEO:GSE99574	FlyBase CV:FBbt:00003004, FBcv:0000334, and FBbt:00004857 - FBbt:00004858 + FBbt:00004829
biological sample (D. willistoni female)	Dwil female reproductive tract replicate 3	NCBI GEO; This paper	NCBI GEO:GSE99574	FlyBase CV:FBbt:00003004, FBcv:0000334, and FBbt:00004857 - FBbt:00004858 + FBbt:00004829
biological sample (D. willistoni female)	Dwil female reproductive tract replicate 4	NCBI GEO; This paper	NCBI GEO:GSE99574	FlyBase CV:FBbt:00003004, FBcv:0000334, and FBbt:00004857 - FBbt:00004858 + FBbt:00004829
biological sample (D. willistoni female)	Dwil female thorax replicate 1	NCBI GEO; This paper	NCBI GEO:GSE99574	FlyBase CV:FBbt:00003004, FBcv:0000334, and FBbt:00000015 - FBbt:00007513
biological sample (D. willistoni female)	Dwil female thorax replicate 2	NCBI GEO; This paper	NCBI GEO:GSE99574	FlyBase CV:FBbt:00003004, FBcv:0000334, and FBbt:00000015 - FBbt:00007513
biological sample (D. willistoni female)	Dwil female thorax replicate 3	NCBI GEO; This paper	NCBI GEO:GSE99574	FlyBase CV:FBbt:00003004, FBcv:0000334, and FBbt:00000015 - FBbt:00007513
biological sample (D. willistoni female)	Dwil female thorax replicate 4	NCBI GEO; This paper	NCBI GEO:GSE99574	FlyBase CV:FBbt:00003004, FBcv:0000334, and FBbt:00000015 - FBbt:00007513
biological sample (D. willistoni female)	Dwil female whole organism replicate 1	NCBI GEO; This paper	NCBI GEO:GSE99574	FlyBase CV:FBbt:00003004, FBcv:0000334, and FBbt:00000001
biological sample (D. willistoni female)	Dwil female whole organism replicate 2	NCBI GEO; This paper	NCBI GEO:GSE99574	FlyBase CV:FBbt:00003004, FBcv:0000334, and FBbt:00000001
biological sample (D. willistoni female)	Dwil female whole organism replicate 3	NCBI GEO; This paper	NCBI GEO:GSE99574	FlyBase CV:FBbt:00003004, FBcv:0000334, and FBbt:00000001
biological sample (D. willistoni female)	Dwil female whole organism replicate 4	NCBI GEO; This paper	NCBI GEO:GSE99574	FlyBase CV:FBbt:00003004, FBcv:0000334, and FBbt:00000001
biological sample (D. willistoni male)	Dwil male abdomen replicate 1	NCBI GEO; This paper	NCBI GEO:GSE99574	FlyBase CV:FBbt:00003004, FBcv:0000333, and FBbt:00000020 - FBbt:00007513 - FBbt:00005725
biological sample (D. willistoni male)	Dwil male abdomen replicate 2	NCBI GEO; This paper	NCBI GEO:GSE99574	FlyBase CV:FBbt:00003004, FBcv:0000333, and FBbt:00000020 - FBbt:00007513 - FBbt:00005725
biological sample (D. willistoni male)	Dwil male abdomen replicate 3	NCBI GEO; This paper	NCBI GEO:GSE99574	FlyBase CV:FBbt:00003004, FBcv:0000333, and FBbt:00000020 - FBbt:00007513 - FBbt:00005725
biological sample (D. willistoni male)	Dwil male abdomen replicate 4	NCBI GEO; This paper	NCBI GEO:GSE99574	FlyBase CV:FBbt:00003004, FBcv:0000333, and FBbt:00000020 - FBbt:00007513 - FBbt:00005725
biological sample (D. willistoni male)	Dwil male viscera replicate 1	NCBI GEO; This paper	NCBI GEO:GSE99574	FlyBase CV:FBbt:00003004, FBcv:0000333, and FBbt:00007513 + FBbt:00005725
biological sample (D. willistoni male)	Dwil male viscera replicate 2	NCBI GEO; This paper	NCBI GEO:GSE99574	FlyBase CV:FBbt:00003004, FBcv:0000333, and FBbt:00007513 + FBbt:00005725
biological sample (D. willistoni male)	Dwil male viscera replicate 3	NCBI GEO; This paper	NCBI GEO:GSE99574	FlyBase CV:FBbt:00003004, FBcv:0000333, and FBbt:00007513 + FBbt:00005725
biological sample (D. willistoni male)	Dwil male viscera replicate 4	NCBI GEO; This paper	NCBI GEO:GSE99574	FlyBase CV:FBbt:00003004, FBcv:0000333, and FBbt:00007513 + FBbt:00005725
biological sample (D. willistoni male)	Dwil male gonad replicate 1	NCBI GEO; This paper	NCBI GEO:GSE99574	FlyBase CV:FBbt:00003004, FBcv:0000333, and FBbt:00004858
biological sample (D. willistoni male)	Dwil male gonad replicate 2	NCBI GEO; This paper	NCBI GEO:GSE99574	FlyBase CV:FBbt:00003004, FBcv:0000333, and FBbt:00004858
biological sample (D. willistoni male)	Dwil male gonad replicate 3	NCBI GEO; This paper	NCBI GEO:GSE99574	FlyBase CV:FBbt:00003004, FBcv:0000333, and FBbt:00004858
biological sample (D. willistoni male)	Dwil male gonad replicate 4	NCBI GEO; This paper	NCBI GEO:GSE99574	FlyBase CV:FBbt:00003004, FBcv:0000333, and FBbt:00004858
biological sample (D. willistoni male)	Dwil male head replicate 1	NCBI GEO; This paper	NCBI GEO:GSE99574	FlyBase CV:FBbt:00003004, FBcv:0000333, and FBbt:00000004
biological sample (D. willistoni male)	Dwil male head replicate 2	NCBI GEO; This paper	NCBI GEO:GSE99574	FlyBase CV:FBbt:00003004, FBcv:0000333, and FBbt:00000004
biological sample (D. willistoni male)	Dwil male head replicate 3	NCBI GEO; This paper	NCBI GEO:GSE99574	FlyBase CV:FBbt:00003004, FBcv:0000333, and FBbt:00000004
biological sample (D. willistoni male)	Dwil male head replicate 4	NCBI GEO; This paper	NCBI GEO:GSE99574	FlyBase CV:FBbt:00003004, FBcv:0000333, and FBbt:00000004
biological sample (D. willistoni male)	Dwil male reproductive tract replicate 1	NCBI GEO; This paper	NCBI GEO:GSE99574	FlyBase CV:FBbt:00003004, FBcv:0000333, and FBbt:00004857 - FBbt:00004858 + FBbt:00004829
biological sample (D. willistoni male)	Dwil male reproductive tract replicate 2	NCBI GEO; This paper	NCBI GEO:GSE99574	FlyBase CV:FBbt:00003004, FBcv:0000333, and FBbt:00004857 - FBbt:00004858 + FBbt:00004829
biological sample (D. willistoni male)	Dwil male reproductive tract replicate 3	NCBI GEO; This paper	NCBI GEO:GSE99574	FlyBase CV:FBbt:00003004, FBcv:0000333, and FBbt:00004857 - FBbt:00004858 + FBbt:00004829
biological sample (D. willistoni male)	Dwil male reproductive tract replicate 4	NCBI GEO; This paper	NCBI GEO:GSE99574	FlyBase CV:FBbt:00003004, FBcv:0000333, and FBbt:00004857 - FBbt:00004858 + FBbt:00004829
biological sample (D. willistoni male)	Dwil male thorax replicate 1	NCBI GEO; This paper	NCBI GEO:GSE99574	FlyBase CV:FBbt:00003004, FBcv:0000333, and FBbt:00000015 - FBbt:00007513
biological sample (D. willistoni male)	Dwil male thorax replicate 2	NCBI GEO; This paper	NCBI GEO:GSE99574	FlyBase CV:FBbt:00003004, FBcv:0000333, and FBbt:00000015 - FBbt:00007513
biological sample (D. willistoni male)	Dwil male thorax replicate 3	NCBI GEO; This paper	NCBI GEO:GSE99574	FlyBase CV:FBbt:00003004, FBcv:0000333, and FBbt:00000015 - FBbt:00007513
biological sample (D. willistoni male)	Dwil male thorax replicate 4	NCBI GEO; This paper	NCBI GEO:GSE99574	FlyBase CV:FBbt:00003004, FBcv:0000333, and FBbt:00000015 - FBbt:00007513
biological sample (D. willistoni male)	Dwil male whole organism replicate 1	NCBI GEO; This paper	NCBI GEO:GSE99574	FlyBase CV:FBbt:00003004, FBcv:0000333, and FBbt:00000001
biological sample (D. willistoni male)	Dwil male whole organism replicate 2	NCBI GEO; This paper	NCBI GEO:GSE99574	FlyBase CV:FBbt:00003004, FBcv:0000333, and FBbt:00000001
biological sample (D. willistoni male)	Dwil male whole organism replicate 3	NCBI GEO; This paper	NCBI GEO:GSE99574	FlyBase CV:FBbt:00003004, FBcv:0000333, and FBbt:00000001
biological sample (D. willistoni male)	Dwil male whole organism replicate 4	NCBI GEO; This paper	NCBI GEO:GSE99574	FlyBase CV:FBbt:00003004, FBcv:0000333, and FBbt:00000001
biological sample (D. yakuba female)	Dyak female abdomen replicate 1	NCBI GEO; This paper	NCBI GEO:GSE99574	FlyBase CV:FBbt:00003004, FBcv:0000334, and FBbt:00000020 - FBbt:00007513 - FBbt:00005725
biological sample (D. yakuba female)	Dyak female abdomen replicate 2	NCBI GEO; This paper	NCBI GEO:GSE99574	FlyBase CV:FBbt:00003004, FBcv:0000334, and FBbt:00000020 - FBbt:00007513 - FBbt:00005725
biological sample (D. yakuba female)	Dyak female abdomen replicate 3	NCBI GEO; This paper	NCBI GEO:GSE99574	FlyBase CV:FBbt:00003004, FBcv:0000334, and FBbt:00000020 - FBbt:00007513 - FBbt:00005725
biological sample (D. yakuba female)	Dyak female abdomen replicate 4	NCBI GEO; This paper	NCBI GEO:GSE99574	FlyBase CV:FBbt:00003004, FBcv:0000334, and FBbt:00000020 - FBbt:00007513 - FBbt:00005725
biological sample (D. yakuba female)	Dyak female viscera replicate 1	NCBI GEO; This paper	NCBI GEO:GSE99574	FlyBase CV:FBbt:00003004, FBcv:0000334, and FBbt:00007513 + FBbt:00005725
biological sample (D. yakuba female)	Dyak female viscera replicate 2	NCBI GEO; This paper	NCBI GEO:GSE99574	FlyBase CV:FBbt:00003004, FBcv:0000334, and FBbt:00007513 + FBbt:00005725
biological sample (D. yakuba female)	Dyak female viscera replicate 3	NCBI GEO; This paper	NCBI GEO:GSE99574	FlyBase CV:FBbt:00003004, FBcv:0000334, and FBbt:00007513 + FBbt:00005725
biological sample (D. yakuba female)	Dyak female viscera replicate 4	NCBI GEO; This paper	NCBI GEO:GSE99574	FlyBase CV:FBbt:00003004, FBcv:0000334, and FBbt:00007513 + FBbt:00005725
biological sample (D. yakuba female)	Dyak female gonad replicate 1	NCBI GEO; This paper	NCBI GEO:GSE99574	FlyBase CV:FBbt:00003004, FBcv:0000334, and FBbt:00004858
biological sample (D. yakuba female)	Dyak female gonad replicate 2	NCBI GEO; This paper	NCBI GEO:GSE99574	FlyBase CV:FBbt:00003004, FBcv:0000334, and FBbt:00004858
biological sample (D. yakuba female)	Dyak female gonad replicate 3	NCBI GEO; This paper	NCBI GEO:GSE99574	FlyBase CV:FBbt:00003004, FBcv:0000334, and FBbt:00004858
biological sample (D. yakuba female)	Dyak female gonad replicate 4	NCBI GEO; This paper	NCBI GEO:GSE99574	FlyBase CV:FBbt:00003004, FBcv:0000334, and FBbt:00004858
biological sample (D. yakuba female)	Dyak female head replicate 1	NCBI GEO; This paper	NCBI GEO:GSE99574	FlyBase CV:FBbt:00003004, FBcv:0000334, and FBbt:00000004
biological sample (D. yakuba female)	Dyak female head replicate 2	NCBI GEO; This paper	NCBI GEO:GSE99574	FlyBase CV:FBbt:00003004, FBcv:0000334, and FBbt:00000004
biological sample (D. yakuba female)	Dyak female head replicate 3	NCBI GEO; This paper	NCBI GEO:GSE99574	FlyBase CV:FBbt:00003004, FBcv:0000334, and FBbt:00000004
biological sample (D. yakuba female)	Dyak female head replicate 4	NCBI GEO; This paper	NCBI GEO:GSE99574	FlyBase CV:FBbt:00003004, FBcv:0000334, and FBbt:00000004
biological sample (D. yakuba female)	Dyak female reproductive tract replicate 1	NCBI GEO; This paper	NCBI GEO:GSE99574	FlyBase CV:FBbt:00003004, FBcv:0000334, and FBbt:00004857 - FBbt:00004858 + FBbt:00004829
biological sample (D. yakuba female)	Dyak female reproductive tract replicate 2	NCBI GEO; This paper	NCBI GEO:GSE99574	FlyBase CV:FBbt:00003004, FBcv:0000334, and FBbt:00004857 - FBbt:00004858 + FBbt:00004829
biological sample (D. yakuba female)	Dyak female reproductive tract replicate 3	NCBI GEO; This paper	NCBI GEO:GSE99574	FlyBase CV:FBbt:00003004, FBcv:0000334, and FBbt:00004857 - FBbt:00004858 + FBbt:00004829
biological sample (D. yakuba female)	Dyak female reproductive tract replicate 4	NCBI GEO; This paper	NCBI GEO:GSE99574	FlyBase CV:FBbt:00003004, FBcv:0000334, and FBbt:00004857 - FBbt:00004858 + FBbt:00004829
biological sample (D. yakuba female)	Dyak female thorax replicate 1	NCBI GEO; This paper	NCBI GEO:GSE99574	FlyBase CV:FBbt:00003004, FBcv:0000334, and FBbt:00000015 - FBbt:00007513
biological sample (D. yakuba female)	Dyak female thorax replicate 2	NCBI GEO; This paper	NCBI GEO:GSE99574	FlyBase CV:FBbt:00003004, FBcv:0000334, and FBbt:00000015 - FBbt:00007513
biological sample (D. yakuba female)	Dyak female thorax replicate 3	NCBI GEO; This paper	NCBI GEO:GSE99574	FlyBase CV:FBbt:00003004, FBcv:0000334, and FBbt:00000015 - FBbt:00007513
biological sample (D. yakuba female)	Dyak female thorax replicate 4	NCBI GEO; This paper	NCBI GEO:GSE99574	FlyBase CV:FBbt:00003004, FBcv:0000334, and FBbt:00000015 - FBbt:00007513
biological sample (D. yakuba female)	Dyak female whole organism replicate 1	NCBI GEO; This paper	NCBI GEO:GSE99574	FlyBase CV:FBbt:00003004, FBcv:0000334, and FBbt:00000001
biological sample (D. yakuba female)	Dyak female whole organism replicate 2	NCBI GEO; This paper	NCBI GEO:GSE99574	FlyBase CV:FBbt:00003004, FBcv:0000334, and FBbt:00000001
biological sample (D. yakuba female)	Dyak female whole organism replicate 3	NCBI GEO; This paper	NCBI GEO:GSE99574	FlyBase CV:FBbt:00003004, FBcv:0000334, and FBbt:00000001
biological sample (D. yakuba female)	Dyak female whole organism replicate 4	NCBI GEO; This paper	NCBI GEO:GSE99574	FlyBase CV:FBbt:00003004, FBcv:0000334, and FBbt:00000001
biological sample (D. yakuba male)	Dyak male abdomen replicate 1	NCBI GEO; This paper	NCBI GEO:GSE99574	FlyBase CV:FBbt:00003004, FBcv:0000333, and FBbt:00000020 - FBbt:00007513 - FBbt:00005725
biological sample (D. yakuba male)	Dyak male abdomen replicate 2	NCBI GEO; This paper	NCBI GEO:GSE99574	FlyBase CV:FBbt:00003004, FBcv:0000333, and FBbt:00000020 - FBbt:00007513 - FBbt:00005725
biological sample (D. yakuba male)	Dyak male abdomen replicate 3	NCBI GEO; This paper	NCBI GEO:GSE99574	FlyBase CV:FBbt:00003004, FBcv:0000333, and FBbt:00000020 - FBbt:00007513 - FBbt:00005725
biological sample (D. yakuba male)	Dyak male abdomen replicate 4	NCBI GEO; This paper	NCBI GEO:GSE99574	FlyBase CV:FBbt:00003004, FBcv:0000333, and FBbt:00000020 - FBbt:00007513 - FBbt:00005725
biological sample (D. yakuba male)	Dyak male viscera replicate 1	NCBI GEO; This paper	NCBI GEO:GSE99574	FlyBase CV:FBbt:00003004, FBcv:0000333, and FBbt:00007513 + FBbt:00005725
biological sample (D. yakuba male)	Dyak male viscera replicate 2	NCBI GEO; This paper	NCBI GEO:GSE99574	FlyBase CV:FBbt:00003004, FBcv:0000333, and FBbt:00007513 + FBbt:00005725
biological sample (D. yakuba male)	Dyak male viscera replicate 3	NCBI GEO; This paper	NCBI GEO:GSE99574	FlyBase CV:FBbt:00003004, FBcv:0000333, and FBbt:00007513 + FBbt:00005725
biological sample (D. yakuba male)	Dyak male viscera replicate 4	NCBI GEO; This paper	NCBI GEO:GSE99574	FlyBase CV:FBbt:00003004, FBcv:0000333, and FBbt:00007513 + FBbt:00005725
biological sample (D. yakuba male)	Dyak male gonad replicate 1	NCBI GEO; This paper	NCBI GEO:GSE99574	FlyBase CV:FBbt:00003004, FBcv:0000333, and FBbt:00004858
biological sample (D. yakuba male)	Dyak male gonad replicate 2	NCBI GEO; This paper	NCBI GEO:GSE99574	FlyBase CV:FBbt:00003004, FBcv:0000333, and FBbt:00004858
biological sample (D. yakuba male)	Dyak male gonad replicate 3	NCBI GEO; This paper	NCBI GEO:GSE99574	FlyBase CV:FBbt:00003004, FBcv:0000333, and FBbt:00004858
biological sample (D. yakuba male)	Dyak male gonad replicate 4	NCBI GEO; This paper	NCBI GEO:GSE99574	FlyBase CV:FBbt:00003004, FBcv:0000333, and FBbt:00004858
biological sample (D. yakuba male)	Dyak male head replicate 1	NCBI GEO; This paper	NCBI GEO:GSE99574	FlyBase CV:FBbt:00003004, FBcv:0000333, and FBbt:00000004
biological sample (D. yakuba male)	Dyak male head replicate 2	NCBI GEO; This paper	NCBI GEO:GSE99574	FlyBase CV:FBbt:00003004, FBcv:0000333, and FBbt:00000004
biological sample (D. yakuba male)	Dyak male head replicate 3	NCBI GEO; This paper	NCBI GEO:GSE99574	FlyBase CV:FBbt:00003004, FBcv:0000333, and FBbt:00000004
biological sample (D. yakuba male)	Dyak male head replicate 4	NCBI GEO; This paper	NCBI GEO:GSE99574	FlyBase CV:FBbt:00003004, FBcv:0000333, and FBbt:00000004
biological sample (D. yakuba male)	Dyak male reproductive tract replicate 1	NCBI GEO; This paper	NCBI GEO:GSE99574	FlyBase CV:FBbt:00003004, FBcv:0000333, and FBbt:00004857 - FBbt:00004858 + FBbt:00004829
biological sample (D. yakuba male)	Dyak male reproductive tract replicate 2	NCBI GEO; This paper	NCBI GEO:GSE99574	FlyBase CV:FBbt:00003004, FBcv:0000333, and FBbt:00004857 - FBbt:00004858 + FBbt:00004829
biological sample (D. yakuba male)	Dyak male reproductive tract replicate 3	NCBI GEO; This paper	NCBI GEO:GSE99574	FlyBase CV:FBbt:00003004, FBcv:0000333, and FBbt:00004857 - FBbt:00004858 + FBbt:00004829
biological sample (D. yakuba male)	Dyak male reproductive tract replicate 4	NCBI GEO; This paper	NCBI GEO:GSE99574	FlyBase CV:FBbt:00003004, FBcv:0000333, and FBbt:00004857 - FBbt:00004858 + FBbt:00004829
biological sample (D. yakuba male)	Dyak male thorax replicate 1	NCBI GEO; This paper	NCBI GEO:GSE99574	FlyBase CV:FBbt:00003004, FBcv:0000333, and FBbt:00000015 - FBbt:00007513
biological sample (D. yakuba male)	Dyak male thorax replicate 2	NCBI GEO; This paper	NCBI GEO:GSE99574	FlyBase CV:FBbt:00003004, FBcv:0000333, and FBbt:00000015 - FBbt:00007513
biological sample (D. yakuba male)	Dyak male thorax replicate 3	NCBI GEO; This paper	NCBI GEO:GSE99574	FlyBase CV:FBbt:00003004, FBcv:0000333, and FBbt:00000015 - FBbt:00007513
biological sample (D. yakuba male)	Dyak male thorax replicate 4	NCBI GEO; This paper	NCBI GEO:GSE99574	FlyBase CV:FBbt:00003004, FBcv:0000333, and FBbt:00000015 - FBbt:00007513
biological sample (D. yakuba male)	Dyak male whole organism replicate 1	NCBI GEO; This paper	NCBI GEO:GSE99574	FlyBase CV:FBbt:00003004, FBcv:0000333, and FBbt:00000001
biological sample (D. yakuba male)	Dyak male whole organism replicate 2	NCBI GEO; This paper	NCBI GEO:GSE99574	FlyBase CV:FBbt:00003004, FBcv:0000333, and FBbt:00000001
biological sample (D. yakuba male)	Dyak male whole organism replicate 3	NCBI GEO; This paper	NCBI GEO:GSE99574	FlyBase CV:FBbt:00003004, FBcv:0000333, and FBbt:00000001
biological sample (D. yakuba male)	Dyak male whole organism replicate 4	NCBI GEO; This paper	NCBI GEO:GSE99574	FlyBase CV:FBbt:00003004, FBcv:0000333, and FBbt:00000001
biological sample (D. melanogaster female)	oreR female abdomen replicate 1	NCBI GEO; This paper	NCBI GEO:GSE99574	FlyBase CV:FBbt:00003004, FBcv:0000334, and FBbt:00000020 - FBbt:00007513 - FBbt:00005725
biological sample (D. melanogaster female)	oreR female abdomen replicate 2	NCBI GEO; This paper	NCBI GEO:GSE99574	FlyBase CV:FBbt:00003004, FBcv:0000334, and FBbt:00000020 - FBbt:00007513 - FBbt:00005725
biological sample (D. melanogaster female)	oreR female abdomen replicate 3	NCBI GEO; This paper	NCBI GEO:GSE99574	FlyBase CV:FBbt:00003004, FBcv:0000334, and FBbt:00000020 - FBbt:00007513 - FBbt:00005725
biological sample (D. melanogaster female)	oreR female abdomen replicate 4	NCBI GEO; This paper	NCBI GEO:GSE99574	FlyBase CV:FBbt:00003004, FBcv:0000334, and FBbt:00000020 - FBbt:00007513 - FBbt:00005725
biological sample (D. melanogaster female)	oreR female viscera replicate 1	NCBI GEO; This paper	NCBI GEO:GSE99574	FlyBase CV:FBbt:00003004, FBcv:0000334, and FBbt:00007513 + FBbt:00005725
biological sample (D. melanogaster female)	oreR female viscera replicate 2	NCBI GEO; This paper	NCBI GEO:GSE99574	FlyBase CV:FBbt:00003004, FBcv:0000334, and FBbt:00007513 + FBbt:00005725
biological sample (D. melanogaster female)	oreR female viscera replicate 3	NCBI GEO; This paper	NCBI GEO:GSE99574	FlyBase CV:FBbt:00003004, FBcv:0000334, and FBbt:00007513 + FBbt:00005725
biological sample (D. melanogaster female)	oreR female viscera replicate 4	NCBI GEO; This paper	NCBI GEO:GSE99574	FlyBase CV:FBbt:00003004, FBcv:0000334, and FBbt:00007513 + FBbt:00005725
biological sample (D. melanogaster female)	oreR female terminalia replicate 1	NCBI GEO; This paper	NCBI GEO:GSE99574	FlyBase CV:FBbt:00003004, FBcv:0000334, and FBbt:00004829
biological sample (D. melanogaster female)	oreR female terminalia replicate 2	NCBI GEO; This paper	NCBI GEO:GSE99574	FlyBase CV:FBbt:00003004, FBcv:0000334, and FBbt:00004829
biological sample (D. melanogaster female)	oreR female terminalia replicate 3	NCBI GEO; This paper	NCBI GEO:GSE99574	FlyBase CV:FBbt:00003004, FBcv:0000334, and FBbt:00004829
biological sample (D. melanogaster female)	oreR female terminalia replicate 4	NCBI GEO; This paper	NCBI GEO:GSE99574	FlyBase CV:FBbt:00003004, FBcv:0000334, and FBbt:00004829
biological sample (D. melanogaster female)	oreR female gonad replicate 1	NCBI GEO; This paper	NCBI GEO:GSE99574	FlyBase CV:FBbt:00003004, FBcv:0000334, and FBbt:00004858
biological sample (D. melanogaster female)	oreR female gonad replicate 2	NCBI GEO; This paper	NCBI GEO:GSE99574	FlyBase CV:FBbt:00003004, FBcv:0000334, and FBbt:00004858
biological sample (D. melanogaster female)	oreR female gonad replicate 3	NCBI GEO; This paper	NCBI GEO:GSE99574	FlyBase CV:FBbt:00003004, FBcv:0000334, and FBbt:00004858
biological sample (D. melanogaster female)	oreR female gonad replicate 4	NCBI GEO; This paper	NCBI GEO:GSE99574	FlyBase CV:FBbt:00003004, FBcv:0000334, and FBbt:00004858
biological sample (D. melanogaster female)	oreR female head replicate 1	NCBI GEO; This paper	NCBI GEO:GSE99574	FlyBase CV:FBbt:00003004, FBcv:0000334, and FBbt:00000004
biological sample (D. melanogaster female)	oreR female head replicate 2	NCBI GEO; This paper	NCBI GEO:GSE99574	FlyBase CV:FBbt:00003004, FBcv:0000334, and FBbt:00000004
biological sample (D. melanogaster female)	oreR female head replicate 3	NCBI GEO; This paper	NCBI GEO:GSE99574	FlyBase CV:FBbt:00003004, FBcv:0000334, and FBbt:00000004
biological sample (D. melanogaster female)	oreR female head replicate 4	NCBI GEO; This paper	NCBI GEO:GSE99574	FlyBase CV:FBbt:00003004, FBcv:0000334, and FBbt:00000004
biological sample (D. melanogaster female)	oreR female internal reproductive tract replicate 1	NCBI GEO; This paper	NCBI GEO:GSE99574	FlyBase CV:FBbt:00003004, FBcv:0000334, and FBbt:00004857 - FBbt:00004858
biological sample (D. melanogaster female)	oreR female internal reproductive tract replicate 2	NCBI GEO; This paper	NCBI GEO:GSE99574	FlyBase CV:FBbt:00003004, FBcv:0000334, and FBbt:00004857 - FBbt:00004858
biological sample (D. melanogaster female)	oreR female internal reproductive tract replicate 3	NCBI GEO; This paper	NCBI GEO:GSE99574	FlyBase CV:FBbt:00003004, FBcv:0000334, and FBbt:00004857 - FBbt:00004858
biological sample (D. melanogaster female)	oreR female internal reproductive tract replicate 4	NCBI GEO; This paper	NCBI GEO:GSE99574	FlyBase CV:FBbt:00003004, FBcv:0000334, and FBbt:00004857 - FBbt:00004858
biological sample (D. melanogaster female)	oreR female thorax replicate 1	NCBI GEO; This paper	NCBI GEO:GSE99574	FlyBase CV:FBbt:00003004, FBcv:0000334, and FBbt:00000015 - FBbt:00007513
biological sample (D. melanogaster female)	oreR female thorax replicate 2	NCBI GEO; This paper	NCBI GEO:GSE99574	FlyBase CV:FBbt:00003004, FBcv:0000334, and FBbt:00000015 - FBbt:00007513
biological sample (D. melanogaster female)	oreR female thorax replicate 3	NCBI GEO; This paper	NCBI GEO:GSE99574	FlyBase CV:FBbt:00003004, FBcv:0000334, and FBbt:00000015 - FBbt:00007513
biological sample (D. melanogaster female)	oreR female thorax replicate 4	NCBI GEO; This paper	NCBI GEO:GSE99574	FlyBase CV:FBbt:00003004, FBcv:0000334, and FBbt:00000015 - FBbt:00007513
biological sample (D. melanogaster female)	oreR female whole organism replicate 1	NCBI GEO; This paper	NCBI GEO:GSE99574	FlyBase CV:FBbt:00003004, FBcv:0000334, and FBbt:00000001
biological sample (D. melanogaster female)	oreR female whole organism replicate 2	NCBI GEO; This paper	NCBI GEO:GSE99574	FlyBase CV:FBbt:00003004, FBcv:0000334, and FBbt:00000001
biological sample (D. melanogaster female)	oreR female whole organism replicate 3	NCBI GEO; This paper	NCBI GEO:GSE99574	FlyBase CV:FBbt:00003004, FBcv:0000334, and FBbt:00000001
biological sample (D. melanogaster female)	oreR female whole organism replicate 4	NCBI GEO; This paper	NCBI GEO:GSE99574	FlyBase CV:FBbt:00003004, FBcv:0000334, and FBbt:00000001
biological sample (D. melanogaster male)	oreR male abdomen replicate 1	NCBI GEO; This paper	NCBI GEO:GSE99574	FlyBase CV:FBbt:00003004, FBcv:0000333, and FBbt:00000020 - FBbt:00007513 - FBbt:00005725
biological sample (D. melanogaster male)	oreR male abdomen replicate 2	NCBI GEO; This paper	NCBI GEO:GSE99574	FlyBase CV:FBbt:00003004, FBcv:0000333, and FBbt:00000020 - FBbt:00007513 - FBbt:00005725
biological sample (D. melanogaster male)	oreR male abdomen replicate 3	NCBI GEO; This paper	NCBI GEO:GSE99574	FlyBase CV:FBbt:00003004, FBcv:0000333, and FBbt:00000020 - FBbt:00007513 - FBbt:00005725
biological sample (D. melanogaster male)	oreR male abdomen replicate 4	NCBI GEO; This paper	NCBI GEO:GSE99574	FlyBase CV:FBbt:00003004, FBcv:0000333, and FBbt:00000020 - FBbt:00007513 - FBbt:00005725
biological sample (D. melanogaster male)	oreR male viscera replicate 1	NCBI GEO; This paper	NCBI GEO:GSE99574	FlyBase CV:FBbt:00003004, FBcv:0000333, and FBbt:00007513 + FBbt:00005725
biological sample (D. melanogaster male)	oreR male viscera replicate 2	NCBI GEO; This paper	NCBI GEO:GSE99574	FlyBase CV:FBbt:00003004, FBcv:0000333, and FBbt:00007513 + FBbt:00005725
biological sample (D. melanogaster male)	oreR male viscera replicate 3	NCBI GEO; This paper	NCBI GEO:GSE99574	FlyBase CV:FBbt:00003004, FBcv:0000333, and FBbt:00007513 + FBbt:00005725
biological sample (D. melanogaster male)	oreR male viscera replicate 4	NCBI GEO; This paper	NCBI GEO:GSE99574	FlyBase CV:FBbt:00003004, FBcv:0000333, and FBbt:00007513 + FBbt:00005725
biological sample (D. melanogaster male)	oreR male terminalia replicate 1	NCBI GEO; This paper	NCBI GEO:GSE99574	FlyBase CV:FBbt:00003004, FBcv:0000333, and FBbt:00004829
biological sample (D. melanogaster male)	oreR male terminalia replicate 2	NCBI GEO; This paper	NCBI GEO:GSE99574	FlyBase CV:FBbt:00003004, FBcv:0000333, and FBbt:00004829
biological sample (D. melanogaster male)	oreR male terminalia replicate 3	NCBI GEO; This paper	NCBI GEO:GSE99574	FlyBase CV:FBbt:00003004, FBcv:0000333, and FBbt:00004829
biological sample (D. melanogaster male)	oreR male terminalia replicate 4	NCBI GEO; This paper	NCBI GEO:GSE99574	FlyBase CV:FBbt:00003004, FBcv:0000333, and FBbt:00004829
biological sample (D. melanogaster male)	oreR male gonad replicate 1	NCBI GEO; This paper	NCBI GEO:GSE99574	FlyBase CV:FBbt:00003004, FBcv:0000333, and FBbt:00004858
biological sample (D. melanogaster male)	oreR male gonad replicate 2	NCBI GEO; This paper	NCBI GEO:GSE99574	FlyBase CV:FBbt:00003004, FBcv:0000333, and FBbt:00004858
biological sample (D. melanogaster male)	oreR male gonad replicate 3	NCBI GEO; This paper	NCBI GEO:GSE99574	FlyBase CV:FBbt:00003004, FBcv:0000333, and FBbt:00004858
biological sample (D. melanogaster male)	oreR male gonad replicate 4	NCBI GEO; This paper	NCBI GEO:GSE99574	FlyBase CV:FBbt:00003004, FBcv:0000333, and FBbt:00004858
biological sample (D. melanogaster male)	oreR male head replicate 1	NCBI GEO; This paper	NCBI GEO:GSE99574	FlyBase CV:FBbt:00003004, FBcv:0000333, and FBbt:00000004
biological sample (D. melanogaster male)	oreR male head replicate 2	NCBI GEO; This paper	NCBI GEO:GSE99574	FlyBase CV:FBbt:00003004, FBcv:0000333, and FBbt:00000004
biological sample (D. melanogaster male)	oreR male head replicate 3	NCBI GEO; This paper	NCBI GEO:GSE99574	FlyBase CV:FBbt:00003004, FBcv:0000333, and FBbt:00000004
biological sample (D. melanogaster male)	oreR male head replicate 4	NCBI GEO; This paper	NCBI GEO:GSE99574	FlyBase CV:FBbt:00003004, FBcv:0000333, and FBbt:00000004
biological sample (D. melanogaster male)	oreR male internal reproductive tract replicate 1	NCBI GEO; This paper	NCBI GEO:GSE99574	FlyBase CV:FBbt:00003004, FBcv:0000333, and FBbt:00004857 - FBbt:00004858
biological sample (D. melanogaster male)	oreR male internal reproductive tract replicate 2	NCBI GEO; This paper	NCBI GEO:GSE99574	FlyBase CV:FBbt:00003004, FBcv:0000333, and FBbt:00004857 - FBbt:00004858
biological sample (D. melanogaster male)	oreR male internal reproductive tract replicate 3	NCBI GEO; This paper	NCBI GEO:GSE99574	FlyBase CV:FBbt:00003004, FBcv:0000333, and FBbt:00004857 - FBbt:00004858
biological sample (D. melanogaster male)	oreR male internal reproductive tract replicate 4	NCBI GEO; This paper	NCBI GEO:GSE99574	FlyBase CV:FBbt:00003004, FBcv:0000333, and FBbt:00004857 - FBbt:00004858
biological sample (D. melanogaster male)	oreR male thorax replicate 1	NCBI GEO; This paper	NCBI GEO:GSE99574	FlyBase CV:FBbt:00003004, FBcv:0000333, and FBbt:00000015 - FBbt:00007513
biological sample (D. melanogaster male)	oreR male thorax replicate 2	NCBI GEO; This paper	NCBI GEO:GSE99574	FlyBase CV:FBbt:00003004, FBcv:0000333, and FBbt:00000015 - FBbt:00007513
biological sample (D. melanogaster male)	oreR male thorax replicate 3	NCBI GEO; This paper	NCBI GEO:GSE99574	FlyBase CV:FBbt:00003004, FBcv:0000333, and FBbt:00000015 - FBbt:00007513
biological sample (D. melanogaster male)	oreR male thorax replicate 4	NCBI GEO; This paper	NCBI GEO:GSE99574	FlyBase CV:FBbt:00003004, FBcv:0000333, and FBbt:00000015 - FBbt:00007513
biological sample (D. melanogaster male)	oreR male whole organism replicate 1	NCBI GEO; This paper	NCBI GEO:GSE99574	FlyBase CV:FBbt:00003004, FBcv:0000333, and FBbt:00000001
biological sample (D. melanogaster male)	oreR male whole organism replicate 2	NCBI GEO; This paper	NCBI GEO:GSE99574	FlyBase CV:FBbt:00003004, FBcv:0000333, and FBbt:00000001
biological sample (D. melanogaster male)	oreR male whole organism replicate 3	NCBI GEO; This paper	NCBI GEO:GSE99574	FlyBase CV:FBbt:00003004, FBcv:0000333, and FBbt:00000001
biological sample (D. melanogaster male)	oreR male whole organism replicate 4	NCBI GEO; This paper	NCBI GEO:GSE99574	FlyBase CV:FBbt:00003004, FBcv:0000333, and FBbt:00000001
biological sample (D. melanogaster female)	w1118 female abdomen replicate 1	NCBI GEO; This paper	NCBI GEO:GSE99574	FlyBase CV:FBbt:00003004, FBcv:0000334, and FBbt:00000020 - FBbt:00007513 - FBbt:00005725
biological sample (D. melanogaster female)	w1118 female abdomen replicate 2	NCBI GEO; This paper	NCBI GEO:GSE99574	FlyBase CV:FBbt:00003004, FBcv:0000334, and FBbt:00000020 - FBbt:00007513 - FBbt:00005725
biological sample (D. melanogaster female)	w1118 female abdomen replicate 3	NCBI GEO; This paper	NCBI GEO:GSE99574	FlyBase CV:FBbt:00003004, FBcv:0000334, and FBbt:00000020 - FBbt:00007513 - FBbt:00005725
biological sample (D. melanogaster female)	w1118 female abdomen replicate 4	NCBI GEO; This paper	NCBI GEO:GSE99574	FlyBase CV:FBbt:00003004, FBcv:0000334, and FBbt:00000020 - FBbt:00007513 - FBbt:00005725
biological sample (D. melanogaster female)	w1118 female viscera replicate 1	NCBI GEO; This paper	NCBI GEO:GSE99574	FlyBase CV:FBbt:00003004, FBcv:0000334, and FBbt:00007513 + FBbt:00005725
biological sample (D. melanogaster female)	w1118 female viscera replicate 2	NCBI GEO; This paper	NCBI GEO:GSE99574	FlyBase CV:FBbt:00003004, FBcv:0000334, and FBbt:00007513 + FBbt:00005725
biological sample (D. melanogaster female)	w1118 female viscera replicate 3	NCBI GEO; This paper	NCBI GEO:GSE99574	FlyBase CV:FBbt:00003004, FBcv:0000334, and FBbt:00007513 + FBbt:00005725
biological sample (D. melanogaster female)	w1118 female viscera replicate 4	NCBI GEO; This paper	NCBI GEO:GSE99574	FlyBase CV:FBbt:00003004, FBcv:0000334, and FBbt:00007513 + FBbt:00005725
biological sample (D. melanogaster female)	w1118 female terminalia replicate 1	NCBI GEO; This paper	NCBI GEO:GSE99574	FlyBase CV:FBbt:00003004, FBcv:0000334, and FBbt:00004829
biological sample (D. melanogaster female)	w1118 female terminalia replicate 2	NCBI GEO; This paper	NCBI GEO:GSE99574	FlyBase CV:FBbt:00003004, FBcv:0000334, and FBbt:00004829
biological sample (D. melanogaster female)	w1118 female terminalia replicate 3	NCBI GEO; This paper	NCBI GEO:GSE99574	FlyBase CV:FBbt:00003004, FBcv:0000334, and FBbt:00004829
biological sample (D. melanogaster female)	w1118 female terminalia replicate 4	NCBI GEO; This paper	NCBI GEO:GSE99574	FlyBase CV:FBbt:00003004, FBcv:0000334, and FBbt:00004829
biological sample (D. melanogaster female)	w1118 female gonad replicate 1	NCBI GEO; This paper	NCBI GEO:GSE99574	FlyBase CV:FBbt:00003004, FBcv:0000334, and FBbt:00004858
biological sample (D. melanogaster female)	w1118 female gonad replicate 2	NCBI GEO; This paper	NCBI GEO:GSE99574	FlyBase CV:FBbt:00003004, FBcv:0000334, and FBbt:00004858
biological sample (D. melanogaster female)	w1118 female gonad replicate 3	NCBI GEO; This paper	NCBI GEO:GSE99574	FlyBase CV:FBbt:00003004, FBcv:0000334, and FBbt:00004858
biological sample (D. melanogaster female)	w1118 female gonad replicate 4	NCBI GEO; This paper	NCBI GEO:GSE99574	FlyBase CV:FBbt:00003004, FBcv:0000334, and FBbt:00004858
biological sample (D. melanogaster female)	w1118 female head replicate 1	NCBI GEO; This paper	NCBI GEO:GSE99574	FlyBase CV:FBbt:00003004, FBcv:0000334, and FBbt:00000004
biological sample (D. melanogaster female)	w1118 female head replicate 2	NCBI GEO; This paper	NCBI GEO:GSE99574	FlyBase CV:FBbt:00003004, FBcv:0000334, and FBbt:00000004
biological sample (D. melanogaster female)	w1118 female head replicate 3	NCBI GEO; This paper	NCBI GEO:GSE99574	FlyBase CV:FBbt:00003004, FBcv:0000334, and FBbt:00000004
biological sample (D. melanogaster female)	w1118 female head replicate 4	NCBI GEO; This paper	NCBI GEO:GSE99574	FlyBase CV:FBbt:00003004, FBcv:0000334, and FBbt:00000004
biological sample (D. melanogaster female)	w1118 female internal reproductive tract replicate 1	NCBI GEO; This paper	NCBI GEO:GSE99574	FlyBase CV:FBbt:00003004, FBcv:0000334, and FBbt:00004857 - FBbt:00004858
biological sample (D. melanogaster female)	w1118 female internal reproductive tract replicate 2	NCBI GEO; This paper	NCBI GEO:GSE99574	FlyBase CV:FBbt:00003004, FBcv:0000334, and FBbt:00004857 - FBbt:00004858
biological sample (D. melanogaster female)	w1118 female internal reproductive tract replicate 3	NCBI GEO; This paper	NCBI GEO:GSE99574	FlyBase CV:FBbt:00003004, FBcv:0000334, and FBbt:00004857 - FBbt:00004858
biological sample (D. melanogaster female)	w1118 female internal reproductive tract replicate 4	NCBI GEO; This paper	NCBI GEO:GSE99574	FlyBase CV:FBbt:00003004, FBcv:0000334, and FBbt:00004857 - FBbt:00004858
biological sample (D. melanogaster female)	w1118 female thorax replicate 1	NCBI GEO; This paper	NCBI GEO:GSE99574	FlyBase CV:FBbt:00003004, FBcv:0000334, and FBbt:00000015 - FBbt:00007513
biological sample (D. melanogaster female)	w1118 female thorax replicate 2	NCBI GEO; This paper	NCBI GEO:GSE99574	FlyBase CV:FBbt:00003004, FBcv:0000334, and FBbt:00000015 - FBbt:00007513
biological sample (D. melanogaster female)	w1118 female thorax replicate 3	NCBI GEO; This paper	NCBI GEO:GSE99574	FlyBase CV:FBbt:00003004, FBcv:0000334, and FBbt:00000015 - FBbt:00007513
biological sample (D. melanogaster female)	w1118 female thorax replicate 4	NCBI GEO; This paper	NCBI GEO:GSE99574	FlyBase CV:FBbt:00003004, FBcv:0000334, and FBbt:00000015 - FBbt:00007513
biological sample (D. melanogaster female)	w1118 female whole organism replicate 1	NCBI GEO; This paper	NCBI GEO:GSE99574	FlyBase CV:FBbt:00003004, FBcv:0000334, and FBbt:00000001
biological sample (D. melanogaster female)	w1118 female whole organism replicate 2	NCBI GEO; This paper	NCBI GEO:GSE99574	FlyBase CV:FBbt:00003004, FBcv:0000334, and FBbt:00000001
biological sample (D. melanogaster female)	w1118 female whole organism replicate 3	NCBI GEO; This paper	NCBI GEO:GSE99574	FlyBase CV:FBbt:00003004, FBcv:0000334, and FBbt:00000001
biological sample (D. melanogaster female)	w1118 female whole organism replicate 4	NCBI GEO; This paper	NCBI GEO:GSE99574	FlyBase CV:FBbt:00003004, FBcv:0000334, and FBbt:00000001
biological sample (D. melanogaster male)	w1118 male abdomen replicate 1	NCBI GEO; This paper	NCBI GEO:GSE99574	FlyBase CV:FBbt:00003004, FBcv:0000333, and FBbt:00000020 - FBbt:00007513 - FBbt:00005725
biological sample (D. melanogaster male)	w1118 male abdomen replicate 2	NCBI GEO; This paper	NCBI GEO:GSE99574	FlyBase CV:FBbt:00003004, FBcv:0000333, and FBbt:00000020 - FBbt:00007513 - FBbt:00005725
biological sample (D. melanogaster male)	w1118 male abdomen replicate 3	NCBI GEO; This paper	NCBI GEO:GSE99574	FlyBase CV:FBbt:00003004, FBcv:0000333, and FBbt:00000020 - FBbt:00007513 - FBbt:00005725
biological sample (D. melanogaster male)	w1118 male abdomen replicate 4	NCBI GEO; This paper	NCBI GEO:GSE99574	FlyBase CV:FBbt:00003004, FBcv:0000333, and FBbt:00000020 - FBbt:00007513 - FBbt:00005725
biological sample (D. melanogaster male)	w1118 male viscera replicate 1	NCBI GEO; This paper	NCBI GEO:GSE99574	FlyBase CV:FBbt:00003004, FBcv:0000333, and FBbt:00007513 + FBbt:00005725
biological sample (D. melanogaster male)	w1118 male viscera replicate 2	NCBI GEO; This paper	NCBI GEO:GSE99574	FlyBase CV:FBbt:00003004, FBcv:0000333, and FBbt:00007513 + FBbt:00005725
biological sample (D. melanogaster male)	w1118 male viscera replicate 3	NCBI GEO; This paper	NCBI GEO:GSE99574	FlyBase CV:FBbt:00003004, FBcv:0000333, and FBbt:00007513 + FBbt:00005725
biological sample (D. melanogaster male)	w1118 male viscera replicate 4	NCBI GEO; This paper	NCBI GEO:GSE99574	FlyBase CV:FBbt:00003004, FBcv:0000333, and FBbt:00007513 + FBbt:00005725
biological sample (D. melanogaster male)	w1118 male terminalia replicate 1	NCBI GEO; This paper	NCBI GEO:GSE99574	FlyBase CV:FBbt:00003004, FBcv:0000333, and FBbt:00004829
biological sample (D. melanogaster male)	w1118 male terminalia replicate 2	NCBI GEO; This paper	NCBI GEO:GSE99574	FlyBase CV:FBbt:00003004, FBcv:0000333, and FBbt:00004829
biological sample (D. melanogaster male)	w1118 male terminalia replicate 3	NCBI GEO; This paper	NCBI GEO:GSE99574	FlyBase CV:FBbt:00003004, FBcv:0000333, and FBbt:00004829
biological sample (D. melanogaster male)	w1118 male terminalia replicate 4	NCBI GEO; This paper	NCBI GEO:GSE99574	FlyBase CV:FBbt:00003004, FBcv:0000333, and FBbt:00004829
biological sample (D. melanogaster male)	w1118 male gonad replicate 1	NCBI GEO; This paper	NCBI GEO:GSE99574	FlyBase CV:FBbt:00003004, FBcv:0000333, and FBbt:00004858
biological sample (D. melanogaster male)	w1118 male gonad replicate 2	NCBI GEO; This paper	NCBI GEO:GSE99574	FlyBase CV:FBbt:00003004, FBcv:0000333, and FBbt:00004858
biological sample (D. melanogaster male)	w1118 male gonad replicate 3	NCBI GEO; This paper	NCBI GEO:GSE99574	FlyBase CV:FBbt:00003004, FBcv:0000333, and FBbt:00004858
biological sample (D. melanogaster male)	w1118 male gonad replicate 4	NCBI GEO; This paper	NCBI GEO:GSE99574	FlyBase CV:FBbt:00003004, FBcv:0000333, and FBbt:00004858
biological sample (D. melanogaster male)	w1118 male head replicate 1	NCBI GEO; This paper	NCBI GEO:GSE99574	FlyBase CV:FBbt:00003004, FBcv:0000333, and FBbt:00000004
biological sample (D. melanogaster male)	w1118 male head replicate 2	NCBI GEO; This paper	NCBI GEO:GSE99574	FlyBase CV:FBbt:00003004, FBcv:0000333, and FBbt:00000004
biological sample (D. melanogaster male)	w1118 male head replicate 3	NCBI GEO; This paper	NCBI GEO:GSE99574	FlyBase CV:FBbt:00003004, FBcv:0000333, and FBbt:00000004
biological sample (D. melanogaster male)	w1118 male head replicate 4	NCBI GEO; This paper	NCBI GEO:GSE99574	FlyBase CV:FBbt:00003004, FBcv:0000333, and FBbt:00000004
biological sample (D. melanogaster male)	w1118 male internal reproductive tract replicate 1	NCBI GEO; This paper	NCBI GEO:GSE99574	FlyBase CV:FBbt:00003004, FBcv:0000333, and FBbt:00004857 - FBbt:00004858
biological sample (D. melanogaster male)	w1118 male internal reproductive tract replicate 2	NCBI GEO; This paper	NCBI GEO:GSE99574	FlyBase CV:FBbt:00003004, FBcv:0000333, and FBbt:00004857 - FBbt:00004858
biological sample (D. melanogaster male)	w1118 male internal reproductive tract replicate 3	NCBI GEO; This paper	NCBI GEO:GSE99574	FlyBase CV:FBbt:00003004, FBcv:0000333, and FBbt:00004857 - FBbt:00004858
biological sample (D. melanogaster male)	w1118 male internal reproductive tract replicate 4	NCBI GEO; This paper	NCBI GEO:GSE99574	FlyBase CV:FBbt:00003004, FBcv:0000333, and FBbt:00004857 - FBbt:00004858
biological sample (D. melanogaster male)	w1118 male thorax replicate 1	NCBI GEO; This paper	NCBI GEO:GSE99574	FlyBase CV:FBbt:00003004, FBcv:0000333, and FBbt:00000015 - FBbt:00007513
biological sample (D. melanogaster male)	w1118 male thorax replicate 2	NCBI GEO; This paper	NCBI GEO:GSE99574	FlyBase CV:FBbt:00003004, FBcv:0000333, and FBbt:00000015 - FBbt:00007513
biological sample (D. melanogaster male)	w1118 male thorax replicate 3	NCBI GEO; This paper	NCBI GEO:GSE99574	FlyBase CV:FBbt:00003004, FBcv:0000333, and FBbt:00000015 - FBbt:00007513
biological sample (D. melanogaster male)	w1118 male thorax replicate 4	NCBI GEO; This paper	NCBI GEO:GSE99574	FlyBase CV:FBbt:00003004, FBcv:0000333, and FBbt:00000015 - FBbt:00007513
biological sample (D. melanogaster male)	w1118 male whole organism replicate 1	NCBI GEO; This paper	NCBI GEO:GSE99574	FlyBase CV:FBbt:00003004, FBcv:0000333, and FBbt:00000001
biological sample (D. melanogaster male)	w1118 male whole organism replicate 2	NCBI GEO; This paper	NCBI GEO:GSE99574	FlyBase CV:FBbt:00003004, FBcv:0000333, and FBbt:00000001
biological sample (D. melanogaster male)	w1118 male whole organism replicate 3	NCBI GEO; This paper	NCBI GEO:GSE99574	FlyBase CV:FBbt:00003004, FBcv:0000333, and FBbt:00000001
biological sample (D. melanogaster male)	w1118 male whole organism replicate 4	NCBI GEO; This paper	NCBI GEO:GSE99574	FlyBase CV:FBbt:00003004, FBcv:0000333, and FBbt:00000001
antibody
recombinant DNA reagent
sequence-based reagent	External RNA Controls Consortium (ERCC) Spike-Ins	National Institute of Standards Technology; Jiang et al. 2011 Genome Res; PMID21816910; Zook et al. 2012 PloS One; PMID22860124; Lee et al. 2016 J. Genomics; PMID27512518	Pool 78 A and B of Standard Reference Materials 2374
peptide, recombinant protein
chemical compound, drug	RNAlater	Ambion (Foster City, CA)	LOT:AM7024
commercial assay or kit	TruSeq Stranded RNA HT Kit (96 Samples Core Box)	Illumina (San Diego, CA)	LOT:200000164
commercial assay or kit	TruSeq Stranded RNA HT Kit (96 Samples Adapter Plate Box)	Illumina (San Diego, CA)	LOT:20001949
commercial assay or kit	TruSeq Stranded RNA HT Kit (96 Samples cDNA Synthesis-PCR)	Illumina (San Diego, CA)	LOT:10083858
commercial assay or kit	ProtoScript II Reverse Transcriptase	New England BioLabs (Ipswich, MA)	LOT:0041501
commercial assay or kit	Quant-iT RiboGreen RNA Assay Kit	Life Technologies (Carlsbad, CA)	LOT:1607371
commercial assay or kit	Quant-iT PicoGreen dsDNA Assay Kit	Life Technologies (Carlsbad, CA)	LOT:1597051
commercial assay or kit	Clontech SMARTer cDNA Synthesis Kit	Clontech (Mountain View, CA)	LOT:634925
commercial assay or kit	DNA Sequencing Reagent kit 4.0 v2	PacBio (Menlo Park, CA)	LOT:100-612-400
large-scale dataset (D. ananassae female)	Dana female abdomen replicate 1 gene-level read counts based on STAR alignments and FlyBase 2017_03 annotation	NCBI GEO; This paper	NCBI GEO GSE99574:GSM2646960_dana_AC_f_r1.htseq_reverse.txt.gz	Based on alternative STAR alignments. Not used in final manuscript.
large-scale dataset (D. ananassae female)	Dana female abdomen replicate 2 gene-level read counts based on STAR alignments and FlyBase 2017_03 annotation	NCBI GEO; This paper	NCBI GEO GSE99574:GSM2646961_dana_AC_f_r2.htseq_reverse.txt.gz	Based on alternative STAR alignments. Not used in final manuscript.
large-scale dataset (D. ananassae female)	Dana female abdomen replicate 3 gene-level read counts based on STAR alignments and FlyBase 2017_03 annotation	NCBI GEO; This paper	NCBI GEO GSE99574:GSM2646962_dana_AC_f_r3.htseq_reverse.txt.gz	Based on alternative STAR alignments. Not used in final manuscript.
large-scale dataset (D. ananassae female)	Dana female abdomen replicate 4 gene-level read counts based on STAR alignments and FlyBase 2017_03 annotation	NCBI GEO; This paper	NCBI GEO GSE99574:GSM2817213_dana_AC_f_r4.htseq_reverse.txt.gz	Based on alternative STAR alignments. Not used in final manuscript.
large-scale dataset (D. ananassae female)	Dana female viscera replicate 1 gene-level read counts based on STAR alignments and FlyBase 2017_03 annotation	NCBI GEO; This paper	NCBI GEO GSE99574:GSM2646966_dana_DG_f_r1.htseq_reverse.txt.gz	Based on alternative STAR alignments. Not used in final manuscript.
large-scale dataset (D. ananassae female)	Dana female viscera replicate 2 gene-level read counts based on STAR alignments and FlyBase 2017_03 annotation	NCBI GEO; This paper	NCBI GEO GSE99574:GSM2646967_dana_DG_f_r2.htseq_reverse.txt.gz	Based on alternative STAR alignments. Not used in final manuscript.
large-scale dataset (D. ananassae female)	Dana female viscera replicate 3 gene-level read counts based on STAR alignments and FlyBase 2017_03 annotation	NCBI GEO; This paper	NCBI GEO GSE99574:GSM2646968_dana_DG_f_r3.htseq_reverse.txt.gz	Based on alternative STAR alignments. Not used in final manuscript.
large-scale dataset (D. ananassae female)	Dana female viscera replicate 4 gene-level read counts based on STAR alignments and FlyBase 2017_03 annotation	NCBI GEO; This paper	NCBI GEO GSE99574:GSM2817215_dana_DG_f_r4.htseq_reverse.txt.gz	Based on alternative STAR alignments. Not used in final manuscript.
large-scale dataset (D. ananassae female)	Dana female gonad replicate 1 gene-level read counts based on STAR alignments and FlyBase 2017_03 annotation	NCBI GEO; This paper	NCBI GEO GSE99574:GSM2646972_dana_GO_f_r1.htseq_reverse.txt.gz	Based on alternative STAR alignments. Not used in final manuscript.
large-scale dataset (D. ananassae female)	Dana female gonad replicate 2 gene-level read counts based on STAR alignments and FlyBase 2017_03 annotation	NCBI GEO; This paper	NCBI GEO GSE99574:GSM2646973_dana_GO_f_r2.htseq_reverse.txt.gz	Based on alternative STAR alignments. Not used in final manuscript.
large-scale dataset (D. ananassae female)	Dana female gonad replicate 3 gene-level read counts based on STAR alignments and FlyBase 2017_03 annotation	NCBI GEO; This paper	NCBI GEO GSE99574:GSM2646974_dana_GO_f_r3.htseq_reverse.txt.gz	Based on alternative STAR alignments. Not used in final manuscript.
large-scale dataset (D. ananassae female)	Dana female gonad replicate 4 gene-level read counts based on STAR alignments and FlyBase 2017_03 annotation	NCBI GEO; This paper	NCBI GEO GSE99574:GSM2817217_dana_GO_f_r4.htseq_reverse.txt.gz	Based on alternative STAR alignments. Not used in final manuscript.
large-scale dataset (D. ananassae female)	Dana female head replicate 1 gene-level read counts based on STAR alignments and FlyBase 2017_03 annotation	NCBI GEO; This paper	NCBI GEO GSE99574:GSM2646978_dana_HD_f_r1.htseq_reverse.txt.gz	Based on alternative STAR alignments. Not used in final manuscript.
large-scale dataset (D. ananassae female)	Dana female head replicate 2 gene-level read counts based on STAR alignments and FlyBase 2017_03 annotation	NCBI GEO; This paper	NCBI GEO GSE99574:GSM2646979_dana_HD_f_r2.htseq_reverse.txt.gz	Based on alternative STAR alignments. Not used in final manuscript.
large-scale dataset (D. ananassae female)	Dana female head replicate 3 gene-level read counts based on STAR alignments and FlyBase 2017_03 annotation	NCBI GEO; This paper	NCBI GEO GSE99574:GSM2646980_dana_HD_f_r3.htseq_reverse.txt.gz	Based on alternative STAR alignments. Not used in final manuscript.
large-scale dataset (D. ananassae female)	Dana female head replicate 4 gene-level read counts based on STAR alignments and FlyBase 2017_03 annotation	NCBI GEO; This paper	NCBI GEO GSE99574:GSM2817219_dana_HD_f_r4.htseq_reverse.txt.gz	Based on alternative STAR alignments. Not used in final manuscript.
large-scale dataset (D. ananassae female)	Dana female reproductive tract replicate 1 gene-level read counts based on STAR alignments and FlyBase 2017_03 annotation	NCBI GEO; This paper	NCBI GEO GSE99574:GSM2646984_dana_RE_f_r1.htseq_reverse.txt.gz	Based on alternative STAR alignments. Not used in final manuscript.
large-scale dataset (D. ananassae female)	Dana female reproductive tract replicate 2 gene-level read counts based on STAR alignments and FlyBase 2017_03 annotation	NCBI GEO; This paper	NCBI GEO GSE99574:GSM2646985_dana_RE_f_r2.htseq_reverse.txt.gz	Based on alternative STAR alignments. Not used in final manuscript.
large-scale dataset (D. ananassae female)	Dana female reproductive tract replicate 3 gene-level read counts based on STAR alignments and FlyBase 2017_03 annotation	NCBI GEO; This paper	NCBI GEO GSE99574:GSM2646986_dana_RE_f_r3.htseq_reverse.txt.gz	Based on alternative STAR alignments. Not used in final manuscript.
large-scale dataset (D. ananassae female)	Dana female reproductive tract replicate 4 gene-level read counts based on STAR alignments and FlyBase 2017_03 annotation	NCBI GEO; This paper	NCBI GEO GSE99574:GSM2817221_dana_RE_f_r4.htseq_reverse.txt.gz	Based on alternative STAR alignments. Not used in final manuscript.
large-scale dataset (D. ananassae female)	Dana female thorax replicate 1 gene-level read counts based on STAR alignments and FlyBase 2017_03 annotation	NCBI GEO; This paper	NCBI GEO GSE99574:GSM2646990_dana_TX_f_r1.htseq_reverse.txt.gz	Based on alternative STAR alignments. Not used in final manuscript.
large-scale dataset (D. ananassae female)	Dana female thorax replicate 2 gene-level read counts based on STAR alignments and FlyBase 2017_03 annotation	NCBI GEO; This paper	NCBI GEO GSE99574:GSM2646991_dana_TX_f_r2.htseq_reverse.txt.gz	Based on alternative STAR alignments. Not used in final manuscript.
large-scale dataset (D. ananassae female)	Dana female thorax replicate 3 gene-level read counts based on STAR alignments and FlyBase 2017_03 annotation	NCBI GEO; This paper	NCBI GEO GSE99574:GSM2646992_dana_TX_f_r3.htseq_reverse.txt.gz	Based on alternative STAR alignments. Not used in final manuscript.
large-scale dataset (D. ananassae female)	Dana female thorax replicate 4 gene-level read counts based on STAR alignments and FlyBase 2017_03 annotation	NCBI GEO; This paper	NCBI GEO GSE99574:GSM2817223_dana_TX_f_r4.htseq_reverse.txt.gz	Based on alternative STAR alignments. Not used in final manuscript.
large-scale dataset (D. ananassae female)	Dana female whole organism replicate 1 gene-level read counts based on STAR alignments and FlyBase 2017_03 annotation	NCBI GEO; This paper	NCBI GEO GSE99574:GSM2646996_dana_WB_f_r1.htseq_reverse.txt.gz	Based on alternative STAR alignments. Not used in final manuscript.
large-scale dataset (D. ananassae female)	Dana female whole organism replicate 2 gene-level read counts based on STAR alignments and FlyBase 2017_03 annotation	NCBI GEO; This paper	NCBI GEO GSE99574:GSM2646997_dana_WB_f_r2.htseq_reverse.txt.gz	Based on alternative STAR alignments. Not used in final manuscript.
large-scale dataset (D. ananassae female)	Dana female whole organism replicate 3 gene-level read counts based on STAR alignments and FlyBase 2017_03 annotation	NCBI GEO; This paper	NCBI GEO GSE99574:GSM2646998_dana_WB_f_r3.htseq_reverse.txt.gz	Based on alternative STAR alignments. Not used in final manuscript.
large-scale dataset (D. ananassae female)	Dana female whole organism replicate 4 gene-level read counts based on STAR alignments and FlyBase 2017_03 annotation	NCBI GEO; This paper	NCBI GEO GSE99574:GSM2817225_dana_WB_f_r4.htseq_reverse.txt.gz	Based on alternative STAR alignments. Not used in final manuscript.
large-scale dataset (D. ananassae male)	Dana male abdomen replicate 1 gene-level read counts based on STAR alignments and FlyBase 2017_03 annotation	NCBI GEO; This paper	NCBI GEO GSE99574:GSM2646963_dana_AC_m_r1.htseq_reverse.txt.gz	Based on alternative STAR alignments. Not used in final manuscript.
large-scale dataset (D. ananassae male)	Dana male abdomen replicate 2 gene-level read counts based on STAR alignments and FlyBase 2017_03 annotation	NCBI GEO; This paper	NCBI GEO GSE99574:GSM2646964_dana_AC_m_r2.htseq_reverse.txt.gz	Based on alternative STAR alignments. Not used in final manuscript.
large-scale dataset (D. ananassae male)	Dana male abdomen replicate 3 gene-level read counts based on STAR alignments and FlyBase 2017_03 annotation	NCBI GEO; This paper	NCBI GEO GSE99574:GSM2646965_dana_AC_m_r3.htseq_reverse.txt.gz	Based on alternative STAR alignments. Not used in final manuscript.
large-scale dataset (D. ananassae male)	Dana male abdomen replicate 4 gene-level read counts based on STAR alignments and FlyBase 2017_03 annotation	NCBI GEO; This paper	NCBI GEO GSE99574:GSM2817214_dana_AC_m_r4.htseq_reverse.txt.gz	Based on alternative STAR alignments. Not used in final manuscript.
large-scale dataset (D. ananassae male)	Dana male viscera replicate 1 gene-level read counts based on STAR alignments and FlyBase 2017_03 annotation	NCBI GEO; This paper	NCBI GEO GSE99574:GSM2646969_dana_DG_m_r1.htseq_reverse.txt.gz	Based on alternative STAR alignments. Not used in final manuscript.
large-scale dataset (D. ananassae male)	Dana male viscera replicate 2 gene-level read counts based on STAR alignments and FlyBase 2017_03 annotation	NCBI GEO; This paper	NCBI GEO GSE99574:GSM2646970_dana_DG_m_r2.htseq_reverse.txt.gz	Based on alternative STAR alignments. Not used in final manuscript.
large-scale dataset (D. ananassae male)	Dana male viscera replicate 3 gene-level read counts based on STAR alignments and FlyBase 2017_03 annotation	NCBI GEO; This paper	NCBI GEO GSE99574:GSM2646971_dana_DG_m_r3.htseq_reverse.txt.gz	Based on alternative STAR alignments. Not used in final manuscript.
large-scale dataset (D. ananassae male)	Dana male viscera replicate 4 gene-level read counts based on STAR alignments and FlyBase 2017_03 annotation	NCBI GEO; This paper	NCBI GEO GSE99574:GSM2817216_dana_DG_m_r4.htseq_reverse.txt.gz	Based on alternative STAR alignments. Not used in final manuscript.
large-scale dataset (D. ananassae male)	Dana male gonad replicate 1 gene-level read counts based on STAR alignments and FlyBase 2017_03 annotation	NCBI GEO; This paper	NCBI GEO GSE99574:GSM2646975_dana_GO_m_r1.htseq_reverse.txt.gz	Based on alternative STAR alignments. Not used in final manuscript.
large-scale dataset (D. ananassae male)	Dana male gonad replicate 2 gene-level read counts based on STAR alignments and FlyBase 2017_03 annotation	NCBI GEO; This paper	NCBI GEO GSE99574:GSM2646976_dana_GO_m_r2.htseq_reverse.txt.gz	Based on alternative STAR alignments. Not used in final manuscript.
large-scale dataset (D. ananassae male)	Dana male gonad replicate 3 gene-level read counts based on STAR alignments and FlyBase 2017_03 annotation	NCBI GEO; This paper	NCBI GEO GSE99574:GSM2646977_dana_GO_m_r3.htseq_reverse.txt.gz	Based on alternative STAR alignments. Not used in final manuscript.
large-scale dataset (D. ananassae male)	Dana male gonad replicate 4 gene-level read counts based on STAR alignments and FlyBase 2017_03 annotation	NCBI GEO; This paper	NCBI GEO GSE99574:GSM2817218_dana_GO_m_r4.htseq_reverse.txt.gz	Based on alternative STAR alignments. Not used in final manuscript.
large-scale dataset (D. ananassae male)	Dana male head replicate 1 gene-level read counts based on STAR alignments and FlyBase 2017_03 annotation	NCBI GEO; This paper	NCBI GEO GSE99574:GSM2646981_dana_HD_m_r1.htseq_reverse.txt.gz	Based on alternative STAR alignments. Not used in final manuscript.
large-scale dataset (D. ananassae male)	Dana male head replicate 2 gene-level read counts based on STAR alignments and FlyBase 2017_03 annotation	NCBI GEO; This paper	NCBI GEO GSE99574:GSM2646982_dana_HD_m_r2.htseq_reverse.txt.gz	Based on alternative STAR alignments. Not used in final manuscript.
large-scale dataset (D. ananassae male)	Dana male head replicate 3 gene-level read counts based on STAR alignments and FlyBase 2017_03 annotation	NCBI GEO; This paper	NCBI GEO GSE99574:GSM2646983_dana_HD_m_r3.htseq_reverse.txt.gz	Based on alternative STAR alignments. Not used in final manuscript.
large-scale dataset (D. ananassae male)	Dana male head replicate 4 gene-level read counts based on STAR alignments and FlyBase 2017_03 annotation	NCBI GEO; This paper	NCBI GEO GSE99574:GSM2817220_dana_HD_m_r4.htseq_reverse.txt.gz	Based on alternative STAR alignments. Not used in final manuscript.
large-scale dataset (D. ananassae male)	Dana male reproductive tract replicate 1 gene-level read counts based on STAR alignments and FlyBase 2017_03 annotation	NCBI GEO; This paper	NCBI GEO GSE99574:GSM2646987_dana_RE_m_r1.htseq_reverse.txt.gz	Based on alternative STAR alignments. Not used in final manuscript.
large-scale dataset (D. ananassae male)	Dana male reproductive tract replicate 2 gene-level read counts based on STAR alignments and FlyBase 2017_03 annotation	NCBI GEO; This paper	NCBI GEO GSE99574:GSM2646988_dana_RE_m_r2.htseq_reverse.txt.gz	Based on alternative STAR alignments. Not used in final manuscript.
large-scale dataset (D. ananassae male)	Dana male reproductive tract replicate 3 gene-level read counts based on STAR alignments and FlyBase 2017_03 annotation	NCBI GEO; This paper	NCBI GEO GSE99574:GSM2646989_dana_RE_m_r3.htseq_reverse.txt.gz	Based on alternative STAR alignments. Not used in final manuscript.
large-scale dataset (D. ananassae male)	Dana male reproductive tract replicate 4 gene-level read counts based on STAR alignments and FlyBase 2017_03 annotation	NCBI GEO; This paper	NCBI GEO GSE99574:GSM2817222_dana_RE_m_r4.htseq_reverse.txt.gz	Based on alternative STAR alignments. Not used in final manuscript.
large-scale dataset (D. ananassae male)	Dana male thorax replicate 1 gene-level read counts based on STAR alignments and FlyBase 2017_03 annotation	NCBI GEO; This paper	NCBI GEO GSE99574:GSM2646993_dana_TX_m_r1.htseq_reverse.txt.gz	Based on alternative STAR alignments. Not used in final manuscript.
large-scale dataset (D. ananassae male)	Dana male thorax replicate 2 gene-level read counts based on STAR alignments and FlyBase 2017_03 annotation	NCBI GEO; This paper	NCBI GEO GSE99574:GSM2646994_dana_TX_m_r2.htseq_reverse.txt.gz	Based on alternative STAR alignments. Not used in final manuscript.
large-scale dataset (D. ananassae male)	Dana male thorax replicate 3 gene-level read counts based on STAR alignments and FlyBase 2017_03 annotation	NCBI GEO; This paper	NCBI GEO GSE99574:GSM2646995_dana_TX_m_r3.htseq_reverse.txt.gz	Based on alternative STAR alignments. Not used in final manuscript.
large-scale dataset (D. ananassae male)	Dana male thorax replicate 4 gene-level read counts based on STAR alignments and FlyBase 2017_03 annotation	NCBI GEO; This paper	NCBI GEO GSE99574:GSM2817224_dana_TX_m_r4.htseq_reverse.txt.gz	Based on alternative STAR alignments. Not used in final manuscript.
large-scale dataset (D. ananassae male)	Dana male whole organism replicate 1 gene-level read counts based on STAR alignments and FlyBase 2017_03 annotation	NCBI GEO; This paper	NCBI GEO GSE99574:GSM2646999_dana_WB_m_r1.htseq_reverse.txt.gz	Based on alternative STAR alignments. Not used in final manuscript.
large-scale dataset (D. ananassae male)	Dana male whole organism replicate 2 gene-level read counts based on STAR alignments and FlyBase 2017_03 annotation	NCBI GEO; This paper	NCBI GEO GSE99574:GSM2647000_dana_WB_m_r2.htseq_reverse.txt.gz	Based on alternative STAR alignments. Not used in final manuscript.
large-scale dataset (D. ananassae male)	Dana male whole organism replicate 3 gene-level read counts based on STAR alignments and FlyBase 2017_03 annotation	NCBI GEO; This paper	NCBI GEO GSE99574:GSM2647001_dana_WB_m_r3.htseq_reverse.txt.gz	Based on alternative STAR alignments. Not used in final manuscript.
large-scale dataset (D. ananassae male)	Dana male whole organism replicate 4 gene-level read counts based on STAR alignments and FlyBase 2017_03 annotation	NCBI GEO; This paper	NCBI GEO GSE99574:GSM2817226_dana_WB_m_r4.htseq_reverse.txt.gz	Based on alternative STAR alignments. Not used in final manuscript.
large-scale dataset (D. grimshawi female)	Dgri female abdomen replicate 1 gene-level read counts based on STAR alignments and FlyBase 2016_05 annotation	NCBI GEO; This paper	NCBI GEO GSM2113124:GSM2113124_dgriG1_f_ac_R1.htseq_reverse.txt.gz	Based on alternative STAR alignments. Not used in final manuscript.
large-scale dataset (D. grimshawi female)	Dgri female abdomen replicate 2 gene-level read counts based on STAR alignments and FlyBase 2016_05 annotation	NCBI GEO; This paper	NCBI GEO GSM2113125:GSM2113125_dgriG1_f_ac_R2.htseq_reverse.txt.gz	Based on alternative STAR alignments. Not used in final manuscript.
large-scale dataset (D. grimshawi female)	Dgri female abdomen replicate 3 gene-level read counts based on STAR alignments and FlyBase 2016_05 annotation	NCBI GEO; This paper	NCBI GEO GSM2113126:GSM2113126_dgriG1_f_ac_R3.htseq_reverse.txt.gz	Based on alternative STAR alignments. Not used in final manuscript.
large-scale dataset (D. grimshawi female)	Dgri female abdomen replicate 4 gene-level read counts based on STAR alignments and FlyBase 2016_05 annotation	NCBI GEO; This paper	NCBI GEO GSM2113127:GSM2113127_dgriG1_f_ac_R4.htseq_reverse.txt.gz	Based on alternative STAR alignments. Not used in final manuscript.
large-scale dataset (D. grimshawi female)	Dgri female viscera replicate 1 gene-level read counts based on STAR alignments and FlyBase 2016_05 annotation	NCBI GEO; This paper	NCBI GEO GSM2113128:GSM2113128_dgriG1_f_dg_R1.htseq_reverse.txt.gz	Based on alternative STAR alignments. Not used in final manuscript.
large-scale dataset (D. grimshawi female)	Dgri female viscera replicate 2 gene-level read counts based on STAR alignments and FlyBase 2016_05 annotation	NCBI GEO; This paper	NCBI GEO GSM2113129:GSM2113129_dgriG1_f_dg_R2.htseq_reverse.txt.gz	Based on alternative STAR alignments. Not used in final manuscript.
large-scale dataset (D. grimshawi female)	Dgri female viscera replicate 3 gene-level read counts based on STAR alignments and FlyBase 2016_05 annotation	NCBI GEO; This paper	NCBI GEO GSM2113130:GSM2113130_dgriG1_f_dg_R3.htseq_reverse.txt.gz	Based on alternative STAR alignments. Not used in final manuscript.
large-scale dataset (D. grimshawi female)	Dgri female viscera replicate 4 gene-level read counts based on STAR alignments and FlyBase 2016_05 annotation	NCBI GEO; This paper	NCBI GEO GSM2113131:GSM2113131_dgriG1_f_dg_R4.htseq_reverse.txt.gz	Based on alternative STAR alignments. Not used in final manuscript.
large-scale dataset (D. grimshawi female)	Dgri female terminalia replicate 1 gene-level read counts based on STAR alignments and FlyBase 2016_05 annotation	NCBI GEO; This paper	NCBI GEO GSM2113132:GSM2113132_dgriG1_f_ge_R1.htseq_reverse.txt.gz	Based on alternative STAR alignments. Not used in final manuscript.
large-scale dataset (D. grimshawi female)	Dgri female terminalia replicate 2 gene-level read counts based on STAR alignments and FlyBase 2016_05 annotation	NCBI GEO; This paper	NCBI GEO GSM2113133:GSM2113133_dgriG1_f_ge_R2.htseq_reverse.txt.gz	Based on alternative STAR alignments. Not used in final manuscript.
large-scale dataset (D. grimshawi female)	Dgri female terminalia replicate 3 gene-level read counts based on STAR alignments and FlyBase 2016_05 annotation	NCBI GEO; This paper	NCBI GEO GSM2113134:GSM2113134_dgriG1_f_ge_R3.htseq_reverse.txt.gz	Based on alternative STAR alignments. Not used in final manuscript.
large-scale dataset (D. grimshawi female)	Dgri female terminalia replicate 4 gene-level read counts based on STAR alignments and FlyBase 2016_05 annotation	NCBI GEO; This paper	NCBI GEO GSM2113135:GSM2113135_dgriG1_f_ge_R4.htseq_reverse.txt.gz	Based on alternative STAR alignments. Not used in final manuscript.
large-scale dataset (D. grimshawi female)	Dgri female gonad replicate 1 gene-level read counts based on STAR alignments and FlyBase 2016_05 annotation	NCBI GEO; This paper	NCBI GEO GSM2113136:GSM2113136_dgriG1_f_go_R1.htseq_reverse.txt.gz	Based on alternative STAR alignments. Not used in final manuscript.
large-scale dataset (D. grimshawi female)	Dgri female gonad replicate 2 gene-level read counts based on STAR alignments and FlyBase 2016_05 annotation	NCBI GEO; This paper	NCBI GEO GSM2113137:GSM2113137_dgriG1_f_go_R2.htseq_reverse.txt.gz	Based on alternative STAR alignments. Not used in final manuscript.
large-scale dataset (D. grimshawi female)	Dgri female gonad replicate 3 gene-level read counts based on STAR alignments and FlyBase 2016_05 annotation	NCBI GEO; This paper	NCBI GEO GSM2113138:GSM2113138_dgriG1_f_go_R3.htseq_reverse.txt.gz	Based on alternative STAR alignments. Not used in final manuscript.
large-scale dataset (D. grimshawi female)	Dgri female gonad replicate 4 gene-level read counts based on STAR alignments and FlyBase 2016_05 annotation	NCBI GEO; This paper	NCBI GEO GSM2113139:GSM2113139_dgriG1_f_go_R4.htseq_reverse.txt.gz	Based on alternative STAR alignments. Not used in final manuscript.
large-scale dataset (D. grimshawi female)	Dgri female head replicate 1 gene-level read counts based on STAR alignments and FlyBase 2016_05 annotation	NCBI GEO; This paper	NCBI GEO GSM2113140:GSM2113140_dgriG1_f_hd_R1.htseq_reverse.txt.gz	Based on alternative STAR alignments. Not used in final manuscript.
large-scale dataset (D. grimshawi female)	Dgri female head replicate 2 gene-level read counts based on STAR alignments and FlyBase 2016_05 annotation	NCBI GEO; This paper	NCBI GEO GSM2113141:GSM2113141_dgriG1_f_hd_R2.htseq_reverse.txt.gz	Based on alternative STAR alignments. Not used in final manuscript.
large-scale dataset (D. grimshawi female)	Dgri female head replicate 3 gene-level read counts based on STAR alignments and FlyBase 2016_05 annotation	NCBI GEO; This paper	NCBI GEO GSM2113142:GSM2113142_dgriG1_f_hd_R3.htseq_reverse.txt.gz	Based on alternative STAR alignments. Not used in final manuscript.
large-scale dataset (D. grimshawi female)	Dgri female head replicate 4 gene-level read counts based on STAR alignments and FlyBase 2016_05 annotation	NCBI GEO; This paper	NCBI GEO GSM2113143:GSM2113143_dgriG1_f_hd_R4.htseq_reverse.txt.gz	Based on alternative STAR alignments. Not used in final manuscript.
large-scale dataset (D. grimshawi female)	Dgri female internal reproductive tract replicate 1 gene-level read counts based on STAR alignments and FlyBase 2016_05 annotation	NCBI GEO; This paper	NCBI GEO GSM2113144:GSM2113144_dgriG1_f_re_R1.htseq_reverse.txt.gz	Based on alternative STAR alignments. Not used in final manuscript.
large-scale dataset (D. grimshawi female)	Dgri female internal reproductive tract replicate 2 gene-level read counts based on STAR alignments and FlyBase 2016_05 annotation	NCBI GEO; This paper	NCBI GEO GSM2113145:GSM2113145_dgriG1_f_re_R2.htseq_reverse.txt.gz	Based on alternative STAR alignments. Not used in final manuscript.
large-scale dataset (D. grimshawi female)	Dgri female internal reproductive tract replicate 3 gene-level read counts based on STAR alignments and FlyBase 2016_05 annotation	NCBI GEO; This paper	NCBI GEO GSM2113146:GSM2113146_dgriG1_f_re_R3.htseq_reverse.txt.gz	Based on alternative STAR alignments. Not used in final manuscript.
large-scale dataset (D. grimshawi female)	Dgri female internal reproductive tract replicate 4 gene-level read counts based on STAR alignments and FlyBase 2016_05 annotation	NCBI GEO; This paper	NCBI GEO GSM2113147:GSM2113147_dgriG1_f_re_R4.htseq_reverse.txt.gz	Based on alternative STAR alignments. Not used in final manuscript.
large-scale dataset (D. grimshawi female)	Dgri female thorax replicate 1 gene-level read counts based on STAR alignments and FlyBase 2016_05 annotation	NCBI GEO; This paper	NCBI GEO GSM2113148:GSM2113148_dgriG1_f_tx_R1.htseq_reverse.txt.gz	Based on alternative STAR alignments. Not used in final manuscript.
large-scale dataset (D. grimshawi female)	Dgri female thorax replicate 2 gene-level read counts based on STAR alignments and FlyBase 2016_05 annotation	NCBI GEO; This paper	NCBI GEO GSM2113149:GSM2113149_dgriG1_f_tx_R2.htseq_reverse.txt.gz	Based on alternative STAR alignments. Not used in final manuscript.
large-scale dataset (D. grimshawi female)	Dgri female thorax replicate 3 gene-level read counts based on STAR alignments and FlyBase 2016_05 annotation	NCBI GEO; This paper	NCBI GEO GSM2113150:GSM2113150_dgriG1_f_tx_R3.htseq_reverse.txt.gz	Based on alternative STAR alignments. Not used in final manuscript.
large-scale dataset (D. grimshawi female)	Dgri female thorax replicate 4 gene-level read counts based on STAR alignments and FlyBase 2016_05 annotation	NCBI GEO; This paper	NCBI GEO GSM2113151:GSM2113151_dgriG1_f_tx_R4.htseq_reverse.txt.gz	Based on alternative STAR alignments. Not used in final manuscript.
large-scale dataset (D. grimshawi female)	Dgri female whole organism replicate 1 gene-level read counts based on STAR alignments and FlyBase 2016_05 annotation	NCBI GEO; This paper	NCBI GEO GSM2113152:GSM2113152_dgriG1_f_wb_R1.htseq_reverse.txt.gz	Based on alternative STAR alignments. Not used in final manuscript.
large-scale dataset (D. grimshawi female)	Dgri female whole organism replicate 2 gene-level read counts based on STAR alignments and FlyBase 2016_05 annotation	NCBI GEO; This paper	NCBI GEO GSM2113153:GSM2113153_dgriG1_f_wb_R2.htseq_reverse.txt.gz	Based on alternative STAR alignments. Not used in final manuscript.
large-scale dataset (D. grimshawi female)	Dgri female whole organism replicate 3 gene-level read counts based on STAR alignments and FlyBase 2016_05 annotation	NCBI GEO; This paper	NCBI GEO GSM2113154:GSM2113154_dgriG1_f_wb_R3.htseq_reverse.txt.gz	Based on alternative STAR alignments. Not used in final manuscript.
large-scale dataset (D. grimshawi female)	Dgri female whole organism replicate 4 gene-level read counts based on STAR alignments and FlyBase 2016_05 annotation	NCBI GEO; This paper	NCBI GEO GSM2113155:GSM2113155_dgriG1_f_wb_R4.htseq_reverse.txt.gz	Based on alternative STAR alignments. Not used in final manuscript.
large-scale dataset (D. grimshawi male)	Dgri male abdomen replicate 1 gene-level read counts based on STAR alignments and FlyBase 2016_05 annotation	NCBI GEO; This paper	NCBI GEO GSM2113156:GSM2113156_dgriG1_m_ac_R1.htseq_reverse.txt.gz	Based on alternative STAR alignments. Not used in final manuscript.
large-scale dataset (D. grimshawi male)	Dgri male abdomen replicate 2 gene-level read counts based on STAR alignments and FlyBase 2016_05 annotation	NCBI GEO; This paper	NCBI GEO GSM2113157:GSM2113157_dgriG1_m_ac_R2.htseq_reverse.txt.gz	Based on alternative STAR alignments. Not used in final manuscript.
large-scale dataset (D. grimshawi male)	Dgri male abdomen replicate 3 gene-level read counts based on STAR alignments and FlyBase 2016_05 annotation	NCBI GEO; This paper	NCBI GEO GSM2113158:GSM2113158_dgriG1_m_ac_R3.htseq_reverse.txt.gz	Based on alternative STAR alignments. Not used in final manuscript.
large-scale dataset (D. grimshawi male)	Dgri male abdomen replicate 4 gene-level read counts based on STAR alignments and FlyBase 2016_05 annotation	NCBI GEO; This paper	NCBI GEO GSM2113159:GSM2113159_dgriG1_m_ac_R4.htseq_reverse.txt.gz	Based on alternative STAR alignments. Not used in final manuscript.
large-scale dataset (D. grimshawi male)	Dgri male viscera replicate 1 gene-level read counts based on STAR alignments and FlyBase 2016_05 annotation	NCBI GEO; This paper	NCBI GEO GSM2113160:GSM2113160_dgriG1_m_dg_R1.htseq_reverse.txt.gz	Based on alternative STAR alignments. Not used in final manuscript.
large-scale dataset (D. grimshawi male)	Dgri male viscera replicate 2 gene-level read counts based on STAR alignments and FlyBase 2016_05 annotation	NCBI GEO; This paper	NCBI GEO GSM2113161:GSM2113161_dgriG1_m_dg_R2.htseq_reverse.txt.gz	Based on alternative STAR alignments. Not used in final manuscript.
large-scale dataset (D. grimshawi male)	Dgri male viscera replicate 3 gene-level read counts based on STAR alignments and FlyBase 2016_05 annotation	NCBI GEO; This paper	NCBI GEO GSM2113162:GSM2113162_dgriG1_m_dg_R3.htseq_reverse.txt.gz	Based on alternative STAR alignments. Not used in final manuscript.
large-scale dataset (D. grimshawi male)	Dgri male viscera replicate 4 gene-level read counts based on STAR alignments and FlyBase 2016_05 annotation	NCBI GEO; This paper	NCBI GEO GSM2113163:GSM2113163_dgriG1_m_dg_R4.htseq_reverse.txt.gz	Based on alternative STAR alignments. Not used in final manuscript.
large-scale dataset (D. grimshawi male)	Dgri male terminalia replicate 1 gene-level read counts based on STAR alignments and FlyBase 2016_05 annotation	NCBI GEO; This paper	NCBI GEO GSM2113164:GSM2113164_dgriG1_m_ge_R1.htseq_reverse.txt.gz	Based on alternative STAR alignments. Not used in final manuscript.
large-scale dataset (D. grimshawi male)	Dgri male terminalia replicate 2 gene-level read counts based on STAR alignments and FlyBase 2016_05 annotation	NCBI GEO; This paper	NCBI GEO GSM2113165:GSM2113165_dgriG1_m_ge_R2.htseq_reverse.txt.gz	Based on alternative STAR alignments. Not used in final manuscript.
large-scale dataset (D. grimshawi male)	Dgri male terminalia replicate 3 gene-level read counts based on STAR alignments and FlyBase 2016_05 annotation	NCBI GEO; This paper	NCBI GEO GSM2113166:GSM2113166_dgriG1_m_ge_R3.htseq_reverse.txt.gz	Based on alternative STAR alignments. Not used in final manuscript.
large-scale dataset (D. grimshawi male)	Dgri male terminalia replicate 4 gene-level read counts based on STAR alignments and FlyBase 2016_05 annotation	NCBI GEO; This paper	NCBI GEO GSM2113167:GSM2113167_dgriG1_m_ge_R4.htseq_reverse.txt.gz	Based on alternative STAR alignments. Not used in final manuscript.
large-scale dataset (D. grimshawi male)	Dgri male gonad replicate 1 gene-level read counts based on STAR alignments and FlyBase 2016_05 annotation	NCBI GEO; This paper	NCBI GEO GSM2113168:GSM2113168_dgriG1_m_go_R1.htseq_reverse.txt.gz	Based on alternative STAR alignments. Not used in final manuscript.
large-scale dataset (D. grimshawi male)	Dgri male gonad replicate 2 gene-level read counts based on STAR alignments and FlyBase 2016_05 annotation	NCBI GEO; This paper	NCBI GEO GSM2113169:GSM2113169_dgriG1_m_go_R2.htseq_reverse.txt.gz	Based on alternative STAR alignments. Not used in final manuscript.
large-scale dataset (D. grimshawi male)	Dgri male gonad replicate 3 gene-level read counts based on STAR alignments and FlyBase 2016_05 annotation	NCBI GEO; This paper	NCBI GEO GSM2113170:GSM2113170_dgriG1_m_go_R3.htseq_reverse.txt.gz	Based on alternative STAR alignments. Not used in final manuscript.
large-scale dataset (D. grimshawi male)	Dgri male gonad replicate 4 gene-level read counts based on STAR alignments and FlyBase 2016_05 annotation	NCBI GEO; This paper	NCBI GEO GSM2113171:GSM2113171_dgriG1_m_go_R4.htseq_reverse.txt.gz	Based on alternative STAR alignments. Not used in final manuscript.
large-scale dataset (D. grimshawi male)	Dgri male head replicate 1 gene-level read counts based on STAR alignments and FlyBase 2016_05 annotation	NCBI GEO; This paper	NCBI GEO GSM2113172:GSM2113172_dgriG1_m_hd_R1.htseq_reverse.txt.gz	Based on alternative STAR alignments. Not used in final manuscript.
large-scale dataset (D. grimshawi male)	Dgri male head replicate 2 gene-level read counts based on STAR alignments and FlyBase 2016_05 annotation	NCBI GEO; This paper	NCBI GEO GSM2113173:GSM2113173_dgriG1_m_hd_R2.htseq_reverse.txt.gz	Based on alternative STAR alignments. Not used in final manuscript.
large-scale dataset (D. grimshawi male)	Dgri male head replicate 3 gene-level read counts based on STAR alignments and FlyBase 2016_05 annotation	NCBI GEO; This paper	NCBI GEO GSM2113174:GSM2113174_dgriG1_m_hd_R3.htseq_reverse.txt.gz	Based on alternative STAR alignments. Not used in final manuscript.
large-scale dataset (D. grimshawi male)	Dgri male head replicate 4 gene-level read counts based on STAR alignments and FlyBase 2016_05 annotation	NCBI GEO; This paper	NCBI GEO GSM2113175:GSM2113175_dgriG1_m_hd_R4.htseq_reverse.txt.gz	Based on alternative STAR alignments. Not used in final manuscript.
large-scale dataset (D. grimshawi male)	Dgri male internal reproductive tract replicate 1 gene-level read counts based on STAR alignments and FlyBase 2016_05 annotation	NCBI GEO; This paper	NCBI GEO GSM2113176:GSM2113176_dgriG1_m_re_R1.htseq_reverse.txt.gz	Based on alternative STAR alignments. Not used in final manuscript.
large-scale dataset (D. grimshawi male)	Dgri male internal reproductive tract replicate 2 gene-level read counts based on STAR alignments and FlyBase 2016_05 annotation	NCBI GEO; This paper	NCBI GEO GSM2113178:GSM2113178_dgriG1_m_re_R2b.htseq_reverse.txt.gz	Based on alternative STAR alignments. Not used in final manuscript.
large-scale dataset (D. grimshawi male)	Dgri male internal reproductive tract replicate 3 gene-level read counts based on STAR alignments and FlyBase 2016_05 annotation	NCBI GEO; This paper	NCBI GEO GSM2113179:GSM2113179_dgriG1_m_re_R3.htseq_reverse.txt.gz	Based on alternative STAR alignments. Not used in final manuscript.
large-scale dataset (D. grimshawi male)	Dgri male internal reproductive tract replicate 4 gene-level read counts based on STAR alignments and FlyBase 2016_05 annotation	NCBI GEO; This paper	NCBI GEO GSM2113180:GSM2113180_dgriG1_m_re_R4.htseq_reverse.txt.gz	Based on alternative STAR alignments. Not used in final manuscript.
large-scale dataset (D. grimshawi male)	Dgri male thorax replicate 1 gene-level read counts based on STAR alignments and FlyBase 2016_05 annotation	NCBI GEO; This paper	NCBI GEO GSM2113181:GSM2113181_dgriG1_m_tx_R1.htseq_reverse.txt.gz	Based on alternative STAR alignments. Not used in final manuscript.
large-scale dataset (D. grimshawi male)	Dgri male thorax replicate 2 gene-level read counts based on STAR alignments and FlyBase 2016_05 annotation	NCBI GEO; This paper	NCBI GEO GSM2113182:GSM2113182_dgriG1_m_tx_R2.htseq_reverse.txt.gz	Based on alternative STAR alignments. Not used in final manuscript.
large-scale dataset (D. grimshawi male)	Dgri male thorax replicate 3 gene-level read counts based on STAR alignments and FlyBase 2016_05 annotation	NCBI GEO; This paper	NCBI GEO GSM2113183:GSM2113183_dgriG1_m_tx_R3.htseq_reverse.txt.gz	Based on alternative STAR alignments. Not used in final manuscript.
large-scale dataset (D. grimshawi male)	Dgri male thorax replicate 4 gene-level read counts based on STAR alignments and FlyBase 2016_05 annotation	NCBI GEO; This paper	NCBI GEO GSM2113184:GSM2113184_dgriG1_m_tx_R4.htseq_reverse.txt.gz	Based on alternative STAR alignments. Not used in final manuscript.
large-scale dataset (D. grimshawi male)	Dgri male whole organism replicate 1 gene-level read counts based on STAR alignments and FlyBase 2016_05 annotation	NCBI GEO; This paper	NCBI GEO GSM2113185:GSM2113185_dgriG1_m_wb_R1.htseq_reverse.txt.gz	Based on alternative STAR alignments. Not used in final manuscript.
large-scale dataset (D. grimshawi male)	Dgri male whole organism replicate 2 gene-level read counts based on STAR alignments and FlyBase 2016_05 annotation	NCBI GEO; This paper	NCBI GEO GSM2113186:GSM2113186_dgriG1_m_wb_R2.htseq_reverse.txt.gz	Based on alternative STAR alignments. Not used in final manuscript.
large-scale dataset (D. grimshawi male)	Dgri male whole organism replicate 3 gene-level read counts based on STAR alignments and FlyBase 2016_05 annotation	NCBI GEO; This paper	NCBI GEO GSM2113187:GSM2113187_dgriG1_m_wb_R3.htseq_reverse.txt.gz	Based on alternative STAR alignments. Not used in final manuscript.
large-scale dataset (D. grimshawi male)	Dgri male whole organism replicate 4 gene-level read counts based on STAR alignments and FlyBase 2016_05 annotation	NCBI GEO; This paper	NCBI GEO GSM2113188:GSM2113188_dgriG1_m_wb_R4.htseq_reverse.txt.gz	Based on alternative STAR alignments. Not used in final manuscript.
large-scale dataset (D. mojavensis female)	Dmoj female abdomen replicate 1 gene-level read counts based on STAR alignments and FlyBase 2017_03 annotation	NCBI GEO; This paper	NCBI GEO GSE99574:GSM2647002_dmoj_AC_f_r1.htseq_reverse.txt.gz	Based on alternative STAR alignments. Not used in final manuscript.
large-scale dataset (D. mojavensis female)	Dmoj female abdomen replicate 2 gene-level read counts based on STAR alignments and FlyBase 2017_03 annotation	NCBI GEO; This paper	NCBI GEO GSE99574:GSM2647003_dmoj_AC_f_r2.htseq_reverse.txt.gz	Based on alternative STAR alignments. Not used in final manuscript.
large-scale dataset (D. mojavensis female)	Dmoj female abdomen replicate 3 gene-level read counts based on STAR alignments and FlyBase 2017_03 annotation	NCBI GEO; This paper	NCBI GEO GSE99574:GSM2647004_dmoj_AC_f_r3.htseq_reverse.txt.gz	Based on alternative STAR alignments. Not used in final manuscript.
large-scale dataset (D. mojavensis female)	Dmoj female abdomen replicate 4 gene-level read counts based on STAR alignments and FlyBase 2017_03 annotation	NCBI GEO; This paper	NCBI GEO GSE99574:GSM2817227_dmoj_AC_f_r4.htseq_reverse.txt.gz	Based on alternative STAR alignments. Not used in final manuscript.
large-scale dataset (D. mojavensis female)	Dmoj female viscera replicate 1 gene-level read counts based on STAR alignments and FlyBase 2017_03 annotation	NCBI GEO; This paper	NCBI GEO GSE99574:GSM2647008_dmoj_DG_f_r1.htseq_reverse.txt.gz	Based on alternative STAR alignments. Not used in final manuscript.
large-scale dataset (D. mojavensis female)	Dmoj female viscera replicate 2 gene-level read counts based on STAR alignments and FlyBase 2017_03 annotation	NCBI GEO; This paper	NCBI GEO GSE99574:GSM2647009_dmoj_DG_f_r2.htseq_reverse.txt.gz	Based on alternative STAR alignments. Not used in final manuscript.
large-scale dataset (D. mojavensis female)	Dmoj female viscera replicate 3 gene-level read counts based on STAR alignments and FlyBase 2017_03 annotation	NCBI GEO; This paper	NCBI GEO GSE99574:GSM2647010_dmoj_DG_f_r3.htseq_reverse.txt.gz	Based on alternative STAR alignments. Not used in final manuscript.
large-scale dataset (D. mojavensis female)	Dmoj female viscera replicate 4 gene-level read counts based on STAR alignments and FlyBase 2017_03 annotation	NCBI GEO; This paper	NCBI GEO GSE99574:GSM2817229_dmoj_DG_f_r4.htseq_reverse.txt.gz	Based on alternative STAR alignments. Not used in final manuscript.
large-scale dataset (D. mojavensis female)	Dmoj female gonad replicate 1 gene-level read counts based on STAR alignments and FlyBase 2017_03 annotation	NCBI GEO; This paper	NCBI GEO GSE99574:GSM2647014_dmoj_GO_f_r1.htseq_reverse.txt.gz	Based on alternative STAR alignments. Not used in final manuscript.
large-scale dataset (D. mojavensis female)	Dmoj female gonad replicate 2 gene-level read counts based on STAR alignments and FlyBase 2017_03 annotation	NCBI GEO; This paper	NCBI GEO GSE99574:GSM2647015_dmoj_GO_f_r2.htseq_reverse.txt.gz	Based on alternative STAR alignments. Not used in final manuscript.
large-scale dataset (D. mojavensis female)	Dmoj female gonad replicate 3 gene-level read counts based on STAR alignments and FlyBase 2017_03 annotation	NCBI GEO; This paper	NCBI GEO GSE99574:GSM2647016_dmoj_GO_f_r3.htseq_reverse.txt.gz	Based on alternative STAR alignments. Not used in final manuscript.
large-scale dataset (D. mojavensis female)	Dmoj female gonad replicate 4 gene-level read counts based on STAR alignments and FlyBase 2017_03 annotation	NCBI GEO; This paper	NCBI GEO GSE99574:GSM2817231_dmoj_GO_f_r4.htseq_reverse.txt.gz	Based on alternative STAR alignments. Not used in final manuscript.
large-scale dataset (D. mojavensis female)	Dmoj female head replicate 1 gene-level read counts based on STAR alignments and FlyBase 2017_03 annotation	NCBI GEO; This paper	NCBI GEO GSE99574:GSM2647020_dmoj_HD_f_r1.htseq_reverse.txt.gz	Based on alternative STAR alignments. Not used in final manuscript.
large-scale dataset (D. mojavensis female)	Dmoj female head replicate 2 gene-level read counts based on STAR alignments and FlyBase 2017_03 annotation	NCBI GEO; This paper	NCBI GEO GSE99574:GSM2647021_dmoj_HD_f_r2.htseq_reverse.txt.gz	Based on alternative STAR alignments. Not used in final manuscript.
large-scale dataset (D. mojavensis female)	Dmoj female head replicate 3 gene-level read counts based on STAR alignments and FlyBase 2017_03 annotation	NCBI GEO; This paper	NCBI GEO GSE99574:GSM2647022_dmoj_HD_f_r3.htseq_reverse.txt.gz	Based on alternative STAR alignments. Not used in final manuscript.
large-scale dataset (D. mojavensis female)	Dmoj female head replicate 4 gene-level read counts based on STAR alignments and FlyBase 2017_03 annotation	NCBI GEO; This paper	NCBI GEO GSE99574:GSM2817233_dmoj_HD_f_r4.htseq_reverse.txt.gz	Based on alternative STAR alignments. Not used in final manuscript.
large-scale dataset (D. mojavensis female)	Dmoj female reproductive tract replicate 1 gene-level read counts based on STAR alignments and FlyBase 2017_03 annotation	NCBI GEO; This paper	NCBI GEO GSE99574:GSM2647026_dmoj_RE_f_r1.htseq_reverse.txt.gz	Based on alternative STAR alignments. Not used in final manuscript.
large-scale dataset (D. mojavensis female)	Dmoj female reproductive tract replicate 2 gene-level read counts based on STAR alignments and FlyBase 2017_03 annotation	NCBI GEO; This paper	NCBI GEO GSE99574:GSM2647027_dmoj_RE_f_r2.htseq_reverse.txt.gz	Based on alternative STAR alignments. Not used in final manuscript.
large-scale dataset (D. mojavensis female)	Dmoj female reproductive tract replicate 3 gene-level read counts based on STAR alignments and FlyBase 2017_03 annotation	NCBI GEO; This paper	NCBI GEO GSE99574:GSM2647028_dmoj_RE_f_r3.htseq_reverse.txt.gz	Based on alternative STAR alignments. Not used in final manuscript.
large-scale dataset (D. mojavensis female)	Dmoj female reproductive tract replicate 4 gene-level read counts based on STAR alignments and FlyBase 2017_03 annotation	NCBI GEO; This paper	NCBI GEO GSE99574:GSM2817235_dmoj_RE_f_r4.htseq_reverse.txt.gz	Based on alternative STAR alignments. Not used in final manuscript.
large-scale dataset (D. mojavensis female)	Dmoj female thorax replicate 1 gene-level read counts based on STAR alignments and FlyBase 2017_03 annotation	NCBI GEO; This paper	NCBI GEO GSE99574:GSM2647032_dmoj_TX_f_r1.htseq_reverse.txt.gz	Based on alternative STAR alignments. Not used in final manuscript.
large-scale dataset (D. mojavensis female)	Dmoj female thorax replicate 2 gene-level read counts based on STAR alignments and FlyBase 2017_03 annotation	NCBI GEO; This paper	NCBI GEO GSE99574:GSM2647033_dmoj_TX_f_r2.htseq_reverse.txt.gz	Based on alternative STAR alignments. Not used in final manuscript.
large-scale dataset (D. mojavensis female)	Dmoj female thorax replicate 3 gene-level read counts based on STAR alignments and FlyBase 2017_03 annotation	NCBI GEO; This paper	NCBI GEO GSE99574:GSM2647034_dmoj_TX_f_r3.htseq_reverse.txt.gz	Based on alternative STAR alignments. Not used in final manuscript.
large-scale dataset (D. mojavensis female)	Dmoj female thorax replicate 4 gene-level read counts based on STAR alignments and FlyBase 2017_03 annotation	NCBI GEO; This paper	NCBI GEO GSE99574:GSM2817237_dmoj_TX_f_r4.htseq_reverse.txt.gz	Based on alternative STAR alignments. Not used in final manuscript.
large-scale dataset (D. mojavensis female)	Dmoj female whole organism replicate 1 gene-level read counts based on STAR alignments and FlyBase 2017_03 annotation	NCBI GEO; This paper	NCBI GEO GSE99574:GSM2647038_dmoj_WB_f_r1.htseq_reverse.txt.gz	Based on alternative STAR alignments. Not used in final manuscript.
large-scale dataset (D. mojavensis female)	Dmoj female whole organism replicate 2 gene-level read counts based on STAR alignments and FlyBase 2017_03 annotation	NCBI GEO; This paper	NCBI GEO GSE99574:GSM2647039_dmoj_WB_f_r2.htseq_reverse.txt.gz	Based on alternative STAR alignments. Not used in final manuscript.
large-scale dataset (D. mojavensis female)	Dmoj female whole organism replicate 3 gene-level read counts based on STAR alignments and FlyBase 2017_03 annotation	NCBI GEO; This paper	NCBI GEO GSE99574:GSM2647040_dmoj_WB_f_r3.htseq_reverse.txt.gz	Based on alternative STAR alignments. Not used in final manuscript.
large-scale dataset (D. mojavensis female)	Dmoj female whole organism replicate 4 gene-level read counts based on STAR alignments and FlyBase 2017_03 annotation	NCBI GEO; This paper	NCBI GEO GSE99574:GSM2817239_dmoj_WB_f_r4.htseq_reverse.txt.gz	Based on alternative STAR alignments. Not used in final manuscript.
large-scale dataset (D. mojavensis male)	Dmoj male abdomen replicate 1 gene-level read counts based on STAR alignments and FlyBase 2017_03 annotation	NCBI GEO; This paper	NCBI GEO GSE99574:GSM2647005_dmoj_AC_m_r1.htseq_reverse.txt.gz	Based on alternative STAR alignments. Not used in final manuscript.
large-scale dataset (D. mojavensis male)	Dmoj male abdomen replicate 2 gene-level read counts based on STAR alignments and FlyBase 2017_03 annotation	NCBI GEO; This paper	NCBI GEO GSE99574:GSM2647006_dmoj_AC_m_r2.htseq_reverse.txt.gz	Based on alternative STAR alignments. Not used in final manuscript.
large-scale dataset (D. mojavensis male)	Dmoj male abdomen replicate 3 gene-level read counts based on STAR alignments and FlyBase 2017_03 annotation	NCBI GEO; This paper	NCBI GEO GSE99574:GSM2647007_dmoj_AC_m_r3.htseq_reverse.txt.gz	Based on alternative STAR alignments. Not used in final manuscript.
large-scale dataset (D. mojavensis male)	Dmoj male abdomen replicate 4 gene-level read counts based on STAR alignments and FlyBase 2017_03 annotation	NCBI GEO; This paper	NCBI GEO GSE99574:GSM2817228_dmoj_AC_m_r4.htseq_reverse.txt.gz	Based on alternative STAR alignments. Not used in final manuscript.
large-scale dataset (D. mojavensis male)	Dmoj male viscera replicate 1 gene-level read counts based on STAR alignments and FlyBase 2017_03 annotation	NCBI GEO; This paper	NCBI GEO GSE99574:GSM2647011_dmoj_DG_m_r1.htseq_reverse.txt.gz	Based on alternative STAR alignments. Not used in final manuscript.
large-scale dataset (D. mojavensis male)	Dmoj male viscera replicate 2 gene-level read counts based on STAR alignments and FlyBase 2017_03 annotation	NCBI GEO; This paper	NCBI GEO GSE99574:GSM2647012_dmoj_DG_m_r2.htseq_reverse.txt.gz	Based on alternative STAR alignments. Not used in final manuscript.
large-scale dataset (D. mojavensis male)	Dmoj male viscera replicate 3 gene-level read counts based on STAR alignments and FlyBase 2017_03 annotation	NCBI GEO; This paper	NCBI GEO GSE99574:GSM2647013_dmoj_DG_m_r3.htseq_reverse.txt.gz	Based on alternative STAR alignments. Not used in final manuscript.
large-scale dataset (D. mojavensis male)	Dmoj male viscera replicate 4 gene-level read counts based on STAR alignments and FlyBase 2017_03 annotation	NCBI GEO; This paper	NCBI GEO GSE99574:GSM2817230_dmoj_DG_m_r4.htseq_reverse.txt.gz	Based on alternative STAR alignments. Not used in final manuscript.
large-scale dataset (D. mojavensis male)	Dmoj male gonad replicate 1 gene-level read counts based on STAR alignments and FlyBase 2017_03 annotation	NCBI GEO; This paper	NCBI GEO GSE99574:GSM2647017_dmoj_GO_m_r1.htseq_reverse.txt.gz	Based on alternative STAR alignments. Not used in final manuscript.
large-scale dataset (D. mojavensis male)	Dmoj male gonad replicate 2 gene-level read counts based on STAR alignments and FlyBase 2017_03 annotation	NCBI GEO; This paper	NCBI GEO GSE99574:GSM2647018_dmoj_GO_m_r2.htseq_reverse.txt.gz	Based on alternative STAR alignments. Not used in final manuscript.
large-scale dataset (D. mojavensis male)	Dmoj male gonad replicate 3 gene-level read counts based on STAR alignments and FlyBase 2017_03 annotation	NCBI GEO; This paper	NCBI GEO GSE99574:GSM2647019_dmoj_GO_m_r3.htseq_reverse.txt.gz	Based on alternative STAR alignments. Not used in final manuscript.
large-scale dataset (D. mojavensis male)	Dmoj male gonad replicate 4 gene-level read counts based on STAR alignments and FlyBase 2017_03 annotation	NCBI GEO; This paper	NCBI GEO GSE99574:GSM2817232_dmoj_GO_m_r4.htseq_reverse.txt.gz	Based on alternative STAR alignments. Not used in final manuscript.
large-scale dataset (D. mojavensis male)	Dmoj male head replicate 1 gene-level read counts based on STAR alignments and FlyBase 2017_03 annotation	NCBI GEO; This paper	NCBI GEO GSE99574:GSM2647023_dmoj_HD_m_r1.htseq_reverse.txt.gz	Based on alternative STAR alignments. Not used in final manuscript.
large-scale dataset (D. mojavensis male)	Dmoj male head replicate 2 gene-level read counts based on STAR alignments and FlyBase 2017_03 annotation	NCBI GEO; This paper	NCBI GEO GSE99574:GSM2647024_dmoj_HD_m_r2.htseq_reverse.txt.gz	Based on alternative STAR alignments. Not used in final manuscript.
large-scale dataset (D. mojavensis male)	Dmoj male head replicate 3 gene-level read counts based on STAR alignments and FlyBase 2017_03 annotation	NCBI GEO; This paper	NCBI GEO GSE99574:GSM2647025_dmoj_HD_m_r3.htseq_reverse.txt.gz	Based on alternative STAR alignments. Not used in final manuscript.
large-scale dataset (D. mojavensis male)	Dmoj male head replicate 4 gene-level read counts based on STAR alignments and FlyBase 2017_03 annotation	NCBI GEO; This paper	NCBI GEO GSE99574:GSM2817234_dmoj_HD_m_r4.htseq_reverse.txt.gz	Based on alternative STAR alignments. Not used in final manuscript.
large-scale dataset (D. mojavensis male)	Dmoj male reproductive tract replicate 1 gene-level read counts based on STAR alignments and FlyBase 2017_03 annotation	NCBI GEO; This paper	NCBI GEO GSE99574:GSM2647029_dmoj_RE_m_r1.htseq_reverse.txt.gz	Based on alternative STAR alignments. Not used in final manuscript.
large-scale dataset (D. mojavensis male)	Dmoj male reproductive tract replicate 2 gene-level read counts based on STAR alignments and FlyBase 2017_03 annotation	NCBI GEO; This paper	NCBI GEO GSE99574:GSM2647030_dmoj_RE_m_r2.htseq_reverse.txt.gz	Based on alternative STAR alignments. Not used in final manuscript.
large-scale dataset (D. mojavensis male)	Dmoj male reproductive tract replicate 3 gene-level read counts based on STAR alignments and FlyBase 2017_03 annotation	NCBI GEO; This paper	NCBI GEO GSE99574:GSM2647031_dmoj_RE_m_r3.htseq_reverse.txt.gz	Based on alternative STAR alignments. Not used in final manuscript.
large-scale dataset (D. mojavensis male)	Dmoj male reproductive tract replicate 4 gene-level read counts based on STAR alignments and FlyBase 2017_03 annotation	NCBI GEO; This paper	NCBI GEO GSE99574:GSM2817236_dmoj_RE_m_r4.htseq_reverse.txt.gz	Based on alternative STAR alignments. Not used in final manuscript.
large-scale dataset (D. mojavensis male)	Dmoj male thorax replicate 1 gene-level read counts based on STAR alignments and FlyBase 2017_03 annotation	NCBI GEO; This paper	NCBI GEO GSE99574:GSM2647035_dmoj_TX_m_r1.htseq_reverse.txt.gz	Based on alternative STAR alignments. Not used in final manuscript.
large-scale dataset (D. mojavensis male)	Dmoj male thorax replicate 2 gene-level read counts based on STAR alignments and FlyBase 2017_03 annotation	NCBI GEO; This paper	NCBI GEO GSE99574:GSM2647036_dmoj_TX_m_r2.htseq_reverse.txt.gz	Based on alternative STAR alignments. Not used in final manuscript.
large-scale dataset (D. mojavensis male)	Dmoj male thorax replicate 3 gene-level read counts based on STAR alignments and FlyBase 2017_03 annotation	NCBI GEO; This paper	NCBI GEO GSE99574:GSM2647037_dmoj_TX_m_r3.htseq_reverse.txt.gz	Based on alternative STAR alignments. Not used in final manuscript.
large-scale dataset (D. mojavensis male)	Dmoj male thorax replicate 4 gene-level read counts based on STAR alignments and FlyBase 2017_03 annotation	NCBI GEO; This paper	NCBI GEO GSE99574:GSM2817238_dmoj_TX_m_r4.htseq_reverse.txt.gz	Based on alternative STAR alignments. Not used in final manuscript.
large-scale dataset (D. mojavensis male)	Dmoj male whole organism replicate 1 gene-level read counts based on STAR alignments and FlyBase 2017_03 annotation	NCBI GEO; This paper	NCBI GEO GSE99574:GSM2647041_dmoj_WB_m_r1.htseq_reverse.txt.gz	Based on alternative STAR alignments. Not used in final manuscript.
large-scale dataset (D. mojavensis male)	Dmoj male whole organism replicate 2 gene-level read counts based on STAR alignments and FlyBase 2017_03 annotation	NCBI GEO; This paper	NCBI GEO GSE99574:GSM2647042_dmoj_WB_m_r2.htseq_reverse.txt.gz	Based on alternative STAR alignments. Not used in final manuscript.
large-scale dataset (D. mojavensis male)	Dmoj male whole organism replicate 3 gene-level read counts based on STAR alignments and FlyBase 2017_03 annotation	NCBI GEO; This paper	NCBI GEO GSE99574:GSM2647043_dmoj_WB_m_r3.htseq_reverse.txt.gz	Based on alternative STAR alignments. Not used in final manuscript.
large-scale dataset (D. mojavensis male)	Dmoj male whole organism replicate 4 gene-level read counts based on STAR alignments and FlyBase 2017_03 annotation	NCBI GEO; This paper	NCBI GEO GSE99574:GSM2817240_dmoj_WB_m_r4.htseq_reverse.txt.gz	Based on alternative STAR alignments. Not used in final manuscript.
large-scale dataset (D. persimilis female)	Dper female abdomen replicate 1 gene-level read counts based on STAR alignments and FlyBase 2017_03 annotation	NCBI GEO; This paper	NCBI GEO GSE99574:GSM2647044_dper_AC_f_r1.htseq_reverse.txt.gz	Based on alternative STAR alignments. Not used in final manuscript.
large-scale dataset (D. persimilis female)	Dper female abdomen replicate 2 gene-level read counts based on STAR alignments and FlyBase 2017_03 annotation	NCBI GEO; This paper	NCBI GEO GSE99574:GSM2647045_dper_AC_f_r2.htseq_reverse.txt.gz	Based on alternative STAR alignments. Not used in final manuscript.
large-scale dataset (D. persimilis female)	Dper female abdomen replicate 3 gene-level read counts based on STAR alignments and FlyBase 2017_03 annotation	NCBI GEO; This paper	NCBI GEO GSE99574:GSM2647046_dper_AC_f_r3.htseq_reverse.txt.gz	Based on alternative STAR alignments. Not used in final manuscript.
large-scale dataset (D. persimilis female)	Dper female abdomen replicate 4 gene-level read counts based on STAR alignments and FlyBase 2017_03 annotation	NCBI GEO; This paper	NCBI GEO GSE99574:GSM2817241_dper_AC_f_r4.htseq_reverse.txt.gz	Based on alternative STAR alignments. Not used in final manuscript.
large-scale dataset (D. persimilis female)	Dper female viscera replicate 1 gene-level read counts based on STAR alignments and FlyBase 2017_03 annotation	NCBI GEO; This paper	NCBI GEO GSE99574:GSM2647050_dper_DG_f_r1.htseq_reverse.txt.gz	Based on alternative STAR alignments. Not used in final manuscript.
large-scale dataset (D. persimilis female)	Dper female viscera replicate 2 gene-level read counts based on STAR alignments and FlyBase 2017_03 annotation	NCBI GEO; This paper	NCBI GEO GSE99574:GSM2647051_dper_DG_f_r2.htseq_reverse.txt.gz	Based on alternative STAR alignments. Not used in final manuscript.
large-scale dataset (D. persimilis female)	Dper female viscera replicate 3 gene-level read counts based on STAR alignments and FlyBase 2017_03 annotation	NCBI GEO; This paper	NCBI GEO GSE99574:GSM2647052_dper_DG_f_r3.htseq_reverse.txt.gz	Based on alternative STAR alignments. Not used in final manuscript.
large-scale dataset (D. persimilis female)	Dper female viscera replicate 4 gene-level read counts based on STAR alignments and FlyBase 2017_03 annotation	NCBI GEO; This paper	NCBI GEO GSE99574:GSM2817243_dper_DG_f_r4.htseq_reverse.txt.gz	Based on alternative STAR alignments. Not used in final manuscript.
large-scale dataset (D. persimilis female)	Dper female gonad replicate 1 gene-level read counts based on STAR alignments and FlyBase 2017_03 annotation	NCBI GEO; This paper	NCBI GEO GSE99574:GSM2647056_dper_GO_f_r1.htseq_reverse.txt.gz	Based on alternative STAR alignments. Not used in final manuscript.
large-scale dataset (D. persimilis female)	Dper female gonad replicate 2 gene-level read counts based on STAR alignments and FlyBase 2017_03 annotation	NCBI GEO; This paper	NCBI GEO GSE99574:GSM2647057_dper_GO_f_r2.htseq_reverse.txt.gz	Based on alternative STAR alignments. Not used in final manuscript.
large-scale dataset (D. persimilis female)	Dper female gonad replicate 3 gene-level read counts based on STAR alignments and FlyBase 2017_03 annotation	NCBI GEO; This paper	NCBI GEO GSE99574:GSM2647058_dper_GO_f_r3.htseq_reverse.txt.gz	Based on alternative STAR alignments. Not used in final manuscript.
large-scale dataset (D. persimilis female)	Dper female gonad replicate 4 gene-level read counts based on STAR alignments and FlyBase 2017_03 annotation	NCBI GEO; This paper	NCBI GEO GSE99574:GSM2817245_dper_GO_f_r4.htseq_reverse.txt.gz	Based on alternative STAR alignments. Not used in final manuscript.
large-scale dataset (D. persimilis female)	Dper female head replicate 1 gene-level read counts based on STAR alignments and FlyBase 2017_03 annotation	NCBI GEO; This paper	NCBI GEO GSE99574:GSM2647062_dper_HD_f_r1.htseq_reverse.txt.gz	Based on alternative STAR alignments. Not used in final manuscript.
large-scale dataset (D. persimilis female)	Dper female head replicate 2 gene-level read counts based on STAR alignments and FlyBase 2017_03 annotation	NCBI GEO; This paper	NCBI GEO GSE99574:GSM2647063_dper_HD_f_r2.htseq_reverse.txt.gz	Based on alternative STAR alignments. Not used in final manuscript.
large-scale dataset (D. persimilis female)	Dper female head replicate 3 gene-level read counts based on STAR alignments and FlyBase 2017_03 annotation	NCBI GEO; This paper	NCBI GEO GSE99574:GSM2647064_dper_HD_f_r3.htseq_reverse.txt.gz	Based on alternative STAR alignments. Not used in final manuscript.
large-scale dataset (D. persimilis female)	Dper female head replicate 4 gene-level read counts based on STAR alignments and FlyBase 2017_03 annotation	NCBI GEO; This paper	NCBI GEO GSE99574:GSM2817247_dper_HD_f_r4.htseq_reverse.txt.gz	Based on alternative STAR alignments. Not used in final manuscript.
large-scale dataset (D. persimilis female)	Dper female reproductive tract replicate 1 gene-level read counts based on STAR alignments and FlyBase 2017_03 annotation	NCBI GEO; This paper	NCBI GEO GSE99574:GSM2647068_dper_RE_f_r1.htseq_reverse.txt.gz	Based on alternative STAR alignments. Not used in final manuscript.
large-scale dataset (D. persimilis female)	Dper female reproductive tract replicate 2 gene-level read counts based on STAR alignments and FlyBase 2017_03 annotation	NCBI GEO; This paper	NCBI GEO GSE99574:GSM2647069_dper_RE_f_r2.htseq_reverse.txt.gz	Based on alternative STAR alignments. Not used in final manuscript.
large-scale dataset (D. persimilis female)	Dper female reproductive tract replicate 3 gene-level read counts based on STAR alignments and FlyBase 2017_03 annotation	NCBI GEO; This paper	NCBI GEO GSE99574:GSM2647070_dper_RE_f_r3.htseq_reverse.txt.gz	Based on alternative STAR alignments. Not used in final manuscript.
large-scale dataset (D. persimilis female)	Dper female reproductive tract replicate 4 gene-level read counts based on STAR alignments and FlyBase 2017_03 annotation	NCBI GEO; This paper	NCBI GEO GSE99574:GSM2817249_dper_RE_f_r4.htseq_reverse.txt.gz	Based on alternative STAR alignments. Not used in final manuscript.
large-scale dataset (D. persimilis female)	Dper female thorax replicate 1 gene-level read counts based on STAR alignments and FlyBase 2017_03 annotation	NCBI GEO; This paper	NCBI GEO GSE99574:GSM2647074_dper_TX_f_r1.htseq_reverse.txt.gz	Based on alternative STAR alignments. Not used in final manuscript.
large-scale dataset (D. persimilis female)	Dper female thorax replicate 2 gene-level read counts based on STAR alignments and FlyBase 2017_03 annotation	NCBI GEO; This paper	NCBI GEO GSE99574:GSM2647075_dper_TX_f_r2.htseq_reverse.txt.gz	Based on alternative STAR alignments. Not used in final manuscript.
large-scale dataset (D. persimilis female)	Dper female thorax replicate 3 gene-level read counts based on STAR alignments and FlyBase 2017_03 annotation	NCBI GEO; This paper	NCBI GEO GSE99574:GSM2647076_dper_TX_f_r3.htseq_reverse.txt.gz	Based on alternative STAR alignments. Not used in final manuscript.
large-scale dataset (D. persimilis female)	Dper female thorax replicate 4 gene-level read counts based on STAR alignments and FlyBase 2017_03 annotation	NCBI GEO; This paper	NCBI GEO GSE99574:GSM2817251_dper_TX_f_r4.htseq_reverse.txt.gz	Based on alternative STAR alignments. Not used in final manuscript.
large-scale dataset (D. persimilis female)	Dper female whole organism replicate 1 gene-level read counts based on STAR alignments and FlyBase 2017_03 annotation	NCBI GEO; This paper	NCBI GEO GSE99574:GSM2647080_dper_WB_f_r1.htseq_reverse.txt.gz	Based on alternative STAR alignments. Not used in final manuscript.
large-scale dataset (D. persimilis female)	Dper female whole organism replicate 2 gene-level read counts based on STAR alignments and FlyBase 2017_03 annotation	NCBI GEO; This paper	NCBI GEO GSE99574:GSM2647081_dper_WB_f_r2.htseq_reverse.txt.gz	Based on alternative STAR alignments. Not used in final manuscript.
large-scale dataset (D. persimilis female)	Dper female whole organism replicate 3 gene-level read counts based on STAR alignments and FlyBase 2017_03 annotation	NCBI GEO; This paper	NCBI GEO GSE99574:GSM2647082_dper_WB_f_r3.htseq_reverse.txt.gz	Based on alternative STAR alignments. Not used in final manuscript.
large-scale dataset (D. persimilis female)	Dper female whole organism replicate 4 gene-level read counts based on STAR alignments and FlyBase 2017_03 annotation	NCBI GEO; This paper	NCBI GEO GSE99574:GSM2817253_dper_WB_f_r4.htseq_reverse.txt.gz	Based on alternative STAR alignments. Not used in final manuscript.
large-scale dataset (D. persimilis male)	Dper male abdomen replicate 1 gene-level read counts based on STAR alignments and FlyBase 2017_03 annotation	NCBI GEO; This paper	NCBI GEO GSE99574:GSM2647047_dper_AC_m_r1.htseq_reverse.txt.gz	Based on alternative STAR alignments. Not used in final manuscript.
large-scale dataset (D. persimilis male)	Dper male abdomen replicate 2 gene-level read counts based on STAR alignments and FlyBase 2017_03 annotation	NCBI GEO; This paper	NCBI GEO GSE99574:GSM2647048_dper_AC_m_r2.htseq_reverse.txt.gz	Based on alternative STAR alignments. Not used in final manuscript.
large-scale dataset (D. persimilis male)	Dper male abdomen replicate 3 gene-level read counts based on STAR alignments and FlyBase 2017_03 annotation	NCBI GEO; This paper	NCBI GEO GSE99574:GSM2647049_dper_AC_m_r3.htseq_reverse.txt.gz	Based on alternative STAR alignments. Not used in final manuscript.
large-scale dataset (D. persimilis male)	Dper male abdomen replicate 4 gene-level read counts based on STAR alignments and FlyBase 2017_03 annotation	NCBI GEO; This paper	NCBI GEO GSE99574:GSM2817242_dper_AC_m_r4.htseq_reverse.txt.gz	Based on alternative STAR alignments. Not used in final manuscript.
large-scale dataset (D. persimilis male)	Dper male viscera replicate 1 gene-level read counts based on STAR alignments and FlyBase 2017_03 annotation	NCBI GEO; This paper	NCBI GEO GSE99574:GSM2647053_dper_DG_m_r1.htseq_reverse.txt.gz	Based on alternative STAR alignments. Not used in final manuscript.
large-scale dataset (D. persimilis male)	Dper male viscera replicate 2 gene-level read counts based on STAR alignments and FlyBase 2017_03 annotation	NCBI GEO; This paper	NCBI GEO GSE99574:GSM2647054_dper_DG_m_r2.htseq_reverse.txt.gz	Based on alternative STAR alignments. Not used in final manuscript.
large-scale dataset (D. persimilis male)	Dper male viscera replicate 3 gene-level read counts based on STAR alignments and FlyBase 2017_03 annotation	NCBI GEO; This paper	NCBI GEO GSE99574:GSM2647055_dper_DG_m_r3.htseq_reverse.txt.gz	Based on alternative STAR alignments. Not used in final manuscript.
large-scale dataset (D. persimilis male)	Dper male viscera replicate 4 gene-level read counts based on STAR alignments and FlyBase 2017_03 annotation	NCBI GEO; This paper	NCBI GEO GSE99574:GSM2817244_dper_DG_m_r4.htseq_reverse.txt.gz	Based on alternative STAR alignments. Not used in final manuscript.
large-scale dataset (D. persimilis male)	Dper male gonad replicate 1 gene-level read counts based on STAR alignments and FlyBase 2017_03 annotation	NCBI GEO; This paper	NCBI GEO GSE99574:GSM2647059_dper_GO_m_r1.htseq_reverse.txt.gz	Based on alternative STAR alignments. Not used in final manuscript.
large-scale dataset (D. persimilis male)	Dper male gonad replicate 2 gene-level read counts based on STAR alignments and FlyBase 2017_03 annotation	NCBI GEO; This paper	NCBI GEO GSE99574:GSM2647060_dper_GO_m_r2.htseq_reverse.txt.gz	Based on alternative STAR alignments. Not used in final manuscript.
large-scale dataset (D. persimilis male)	Dper male gonad replicate 3 gene-level read counts based on STAR alignments and FlyBase 2017_03 annotation	NCBI GEO; This paper	NCBI GEO GSE99574:GSM2647061_dper_GO_m_r3.htseq_reverse.txt.gz	Based on alternative STAR alignments. Not used in final manuscript.
large-scale dataset (D. persimilis male)	Dper male gonad replicate 4 gene-level read counts based on STAR alignments and FlyBase 2017_03 annotation	NCBI GEO; This paper	NCBI GEO GSE99574:GSM2817246_dper_GO_m_r4.htseq_reverse.txt.gz	Based on alternative STAR alignments. Not used in final manuscript.
large-scale dataset (D. persimilis male)	Dper male head replicate 1 gene-level read counts based on STAR alignments and FlyBase 2017_03 annotation	NCBI GEO; This paper	NCBI GEO GSE99574:GSM2647065_dper_HD_m_r1.htseq_reverse.txt.gz	Based on alternative STAR alignments. Not used in final manuscript.
large-scale dataset (D. persimilis male)	Dper male head replicate 2 gene-level read counts based on STAR alignments and FlyBase 2017_03 annotation	NCBI GEO; This paper	NCBI GEO GSE99574:GSM2647066_dper_HD_m_r2.htseq_reverse.txt.gz	Based on alternative STAR alignments. Not used in final manuscript.
large-scale dataset (D. persimilis male)	Dper male head replicate 3 gene-level read counts based on STAR alignments and FlyBase 2017_03 annotation	NCBI GEO; This paper	NCBI GEO GSE99574:GSM2647067_dper_HD_m_r3.htseq_reverse.txt.gz	Based on alternative STAR alignments. Not used in final manuscript.
large-scale dataset (D. persimilis male)	Dper male head replicate 4 gene-level read counts based on STAR alignments and FlyBase 2017_03 annotation	NCBI GEO; This paper	NCBI GEO GSE99574:GSM2817248_dper_HD_m_r4.htseq_reverse.txt.gz	Based on alternative STAR alignments. Not used in final manuscript.
large-scale dataset (D. persimilis male)	Dper male reproductive tract replicate 1 gene-level read counts based on STAR alignments and FlyBase 2017_03 annotation	NCBI GEO; This paper	NCBI GEO GSE99574:GSM2647071_dper_RE_m_r1.htseq_reverse.txt.gz	Based on alternative STAR alignments. Not used in final manuscript.
large-scale dataset (D. persimilis male)	Dper male reproductive tract replicate 2 gene-level read counts based on STAR alignments and FlyBase 2017_03 annotation	NCBI GEO; This paper	NCBI GEO GSE99574:GSM2647072_dper_RE_m_r2.htseq_reverse.txt.gz	Based on alternative STAR alignments. Not used in final manuscript.
large-scale dataset (D. persimilis male)	Dper male reproductive tract replicate 3 gene-level read counts based on STAR alignments and FlyBase 2017_03 annotation	NCBI GEO; This paper	NCBI GEO GSE99574:GSM2647073_dper_RE_m_r3.htseq_reverse.txt.gz	Based on alternative STAR alignments. Not used in final manuscript.
large-scale dataset (D. persimilis male)	Dper male reproductive tract replicate 4 gene-level read counts based on STAR alignments and FlyBase 2017_03 annotation	NCBI GEO; This paper	NCBI GEO GSE99574:GSM2817250_dper_RE_m_r4.htseq_reverse.txt.gz	Based on alternative STAR alignments. Not used in final manuscript.
large-scale dataset (D. persimilis male)	Dper male thorax replicate 1 gene-level read counts based on STAR alignments and FlyBase 2017_03 annotation	NCBI GEO; This paper	NCBI GEO GSE99574:GSM2647077_dper_TX_m_r1.htseq_reverse.txt.gz	Based on alternative STAR alignments. Not used in final manuscript.
large-scale dataset (D. persimilis male)	Dper male thorax replicate 2 gene-level read counts based on STAR alignments and FlyBase 2017_03 annotation	NCBI GEO; This paper	NCBI GEO GSE99574:GSM2647078_dper_TX_m_r2.htseq_reverse.txt.gz	Based on alternative STAR alignments. Not used in final manuscript.
large-scale dataset (D. persimilis male)	Dper male thorax replicate 3 gene-level read counts based on STAR alignments and FlyBase 2017_03 annotation	NCBI GEO; This paper	NCBI GEO GSE99574:GSM2647079_dper_TX_m_r3.htseq_reverse.txt.gz	Based on alternative STAR alignments. Not used in final manuscript.
large-scale dataset (D. persimilis male)	Dper male thorax replicate 4 gene-level read counts based on STAR alignments and FlyBase 2017_03 annotation	NCBI GEO; This paper	NCBI GEO GSE99574:GSM2817252_dper_TX_m_r4.htseq_reverse.txt.gz	Based on alternative STAR alignments. Not used in final manuscript.
large-scale dataset (D. persimilis male)	Dper male whole organism replicate 1 gene-level read counts based on STAR alignments and FlyBase 2017_03 annotation	NCBI GEO; This paper	NCBI GEO GSE99574:GSM2647083_dper_WB_m_r1.htseq_reverse.txt.gz	Based on alternative STAR alignments. Not used in final manuscript.
large-scale dataset (D. persimilis male)	Dper male whole organism replicate 2 gene-level read counts based on STAR alignments and FlyBase 2017_03 annotation	NCBI GEO; This paper	NCBI GEO GSE99574:GSM2647084_dper_WB_m_r2.htseq_reverse.txt.gz	Based on alternative STAR alignments. Not used in final manuscript.
large-scale dataset (D. persimilis male)	Dper male whole organism replicate 3 gene-level read counts based on STAR alignments and FlyBase 2017_03 annotation	NCBI GEO; This paper	NCBI GEO GSE99574:GSM2647085_dper_WB_m_r3.htseq_reverse.txt.gz	Based on alternative STAR alignments. Not used in final manuscript.
large-scale dataset (D. persimilis male)	Dper male whole organism replicate 4 gene-level read counts based on STAR alignments and FlyBase 2017_03 annotation	NCBI GEO; This paper	NCBI GEO GSE99574:GSM2817254_dper_WB_m_r4.htseq_reverse.txt.gz	Based on alternative STAR alignments. Not used in final manuscript.
large-scale dataset (D. pseudoobscura female)	Dpse female abdomen replicate 1 gene-level read counts based on STAR alignments and FlyBase 2017_03 annotation	NCBI GEO; This paper	NCBI GEO GSE99574:GSM2647086_dpse_AC_f_r1.htseq_reverse.txt.gz	Based on alternative STAR alignments. Not used in final manuscript.
large-scale dataset (D. pseudoobscura female)	Dpse female abdomen replicate 2 gene-level read counts based on STAR alignments and FlyBase 2017_03 annotation	NCBI GEO; This paper	NCBI GEO GSE99574:GSM2647087_dpse_AC_f_r2.htseq_reverse.txt.gz	Based on alternative STAR alignments. Not used in final manuscript.
large-scale dataset (D. pseudoobscura female)	Dpse female abdomen replicate 3 gene-level read counts based on STAR alignments and FlyBase 2017_03 annotation	NCBI GEO; This paper	NCBI GEO GSE99574:GSM2647088_dpse_AC_f_r3.htseq_reverse.txt.gz	Based on alternative STAR alignments. Not used in final manuscript.
large-scale dataset (D. pseudoobscura female)	Dpse female abdomen replicate 4 gene-level read counts based on STAR alignments and FlyBase 2017_03 annotation	NCBI GEO; This paper	NCBI GEO GSE99574:GSM2817255_dpse_AC_f_r4.htseq_reverse.txt.gz	Based on alternative STAR alignments. Not used in final manuscript.
large-scale dataset (D. pseudoobscura female)	Dpse female viscera replicate 1 gene-level read counts based on STAR alignments and FlyBase 2017_03 annotation	NCBI GEO; This paper	NCBI GEO GSE99574:GSM2647092_dpse_DG_f_r1.htseq_reverse.txt.gz	Based on alternative STAR alignments. Not used in final manuscript.
large-scale dataset (D. pseudoobscura female)	Dpse female viscera replicate 2 gene-level read counts based on STAR alignments and FlyBase 2017_03 annotation	NCBI GEO; This paper	NCBI GEO GSE99574:GSM2647093_dpse_DG_f_r2.htseq_reverse.txt.gz	Based on alternative STAR alignments. Not used in final manuscript.
large-scale dataset (D. pseudoobscura female)	Dpse female viscera replicate 3 gene-level read counts based on STAR alignments and FlyBase 2017_03 annotation	NCBI GEO; This paper	NCBI GEO GSE99574:GSM2647094_dpse_DG_f_r3.htseq_reverse.txt.gz	Based on alternative STAR alignments. Not used in final manuscript.
large-scale dataset (D. pseudoobscura female)	Dpse female viscera replicate 4 gene-level read counts based on STAR alignments and FlyBase 2017_03 annotation	NCBI GEO; This paper	NCBI GEO GSE99574:GSM2817257_dpse_DG_f_r4.htseq_reverse.txt.gz	Based on alternative STAR alignments. Not used in final manuscript.
large-scale dataset (D. pseudoobscura female)	Dpse female gonad replicate 1 gene-level read counts based on STAR alignments and FlyBase 2017_03 annotation	NCBI GEO; This paper	NCBI GEO GSE99574:GSM2647098_dpse_GO_f_r1.htseq_reverse.txt.gz	Based on alternative STAR alignments. Not used in final manuscript.
large-scale dataset (D. pseudoobscura female)	Dpse female gonad replicate 2 gene-level read counts based on STAR alignments and FlyBase 2017_03 annotation	NCBI GEO; This paper	NCBI GEO GSE99574:GSM2647099_dpse_GO_f_r2.htseq_reverse.txt.gz	Based on alternative STAR alignments. Not used in final manuscript.
large-scale dataset (D. pseudoobscura female)	Dpse female gonad replicate 3 gene-level read counts based on STAR alignments and FlyBase 2017_03 annotation	NCBI GEO; This paper	NCBI GEO GSE99574:GSM2647100_dpse_GO_f_r3.htseq_reverse.txt.gz	Based on alternative STAR alignments. Not used in final manuscript.
large-scale dataset (D. pseudoobscura female)	Dpse female gonad replicate 4 gene-level read counts based on STAR alignments and FlyBase 2017_03 annotation	NCBI GEO; This paper	NCBI GEO GSE99574:GSM2817259_dpse_GO_f_r4.htseq_reverse.txt.gz	Based on alternative STAR alignments. Not used in final manuscript.
large-scale dataset (D. pseudoobscura female)	Dpse female head replicate 1 gene-level read counts based on STAR alignments and FlyBase 2017_03 annotation	NCBI GEO; This paper	NCBI GEO GSE99574:GSM2647104_dpse_HD_f_r1.htseq_reverse.txt.gz	Based on alternative STAR alignments. Not used in final manuscript.
large-scale dataset (D. pseudoobscura female)	Dpse female head replicate 2 gene-level read counts based on STAR alignments and FlyBase 2017_03 annotation	NCBI GEO; This paper	NCBI GEO GSE99574:GSM2647105_dpse_HD_f_r2.htseq_reverse.txt.gz	Based on alternative STAR alignments. Not used in final manuscript.
large-scale dataset (D. pseudoobscura female)	Dpse female head replicate 3 gene-level read counts based on STAR alignments and FlyBase 2017_03 annotation	NCBI GEO; This paper	NCBI GEO GSE99574:GSM2647106_dpse_HD_f_r3.htseq_reverse.txt.gz	Based on alternative STAR alignments. Not used in final manuscript.
large-scale dataset (D. pseudoobscura female)	Dpse female head replicate 4 gene-level read counts based on STAR alignments and FlyBase 2017_03 annotation	NCBI GEO; This paper	NCBI GEO GSE99574:GSM2817261_dpse_HD_f_r4.htseq_reverse.txt.gz	Based on alternative STAR alignments. Not used in final manuscript.
large-scale dataset (D. pseudoobscura female)	Dpse female reproductive tract replicate 1 gene-level read counts based on STAR alignments and FlyBase 2017_03 annotation	NCBI GEO; This paper	NCBI GEO GSE99574:GSM2647110_dpse_RE_f_r1.htseq_reverse.txt.gz	Based on alternative STAR alignments. Not used in final manuscript.
large-scale dataset (D. pseudoobscura female)	Dpse female reproductive tract replicate 2 gene-level read counts based on STAR alignments and FlyBase 2017_03 annotation	NCBI GEO; This paper	NCBI GEO GSE99574:GSM2647111_dpse_RE_f_r2.htseq_reverse.txt.gz	Based on alternative STAR alignments. Not used in final manuscript.
large-scale dataset (D. pseudoobscura female)	Dpse female reproductive tract replicate 3 gene-level read counts based on STAR alignments and FlyBase 2017_03 annotation	NCBI GEO; This paper	NCBI GEO GSE99574:GSM2647112_dpse_RE_f_r3.htseq_reverse.txt.gz	Based on alternative STAR alignments. Not used in final manuscript.
large-scale dataset (D. pseudoobscura female)	Dpse female reproductive tract replicate 4 gene-level read counts based on STAR alignments and FlyBase 2017_03 annotation	NCBI GEO; This paper	NCBI GEO GSE99574:GSM2817263_dpse_RE_f_r4.htseq_reverse.txt.gz	Based on alternative STAR alignments. Not used in final manuscript.
large-scale dataset (D. pseudoobscura female)	Dpse female thorax replicate 1 gene-level read counts based on STAR alignments and FlyBase 2017_03 annotation	NCBI GEO; This paper	NCBI GEO GSE99574:GSM2647116_dpse_TX_f_r1.htseq_reverse.txt.gz	Based on alternative STAR alignments. Not used in final manuscript.
large-scale dataset (D. pseudoobscura female)	Dpse female thorax replicate 2 gene-level read counts based on STAR alignments and FlyBase 2017_03 annotation	NCBI GEO; This paper	NCBI GEO GSE99574:GSM2647117_dpse_TX_f_r2.htseq_reverse.txt.gz	Based on alternative STAR alignments. Not used in final manuscript.
large-scale dataset (D. pseudoobscura female)	Dpse female thorax replicate 3 gene-level read counts based on STAR alignments and FlyBase 2017_03 annotation	NCBI GEO; This paper	NCBI GEO GSE99574:GSM2647118_dpse_TX_f_r3.htseq_reverse.txt.gz	Based on alternative STAR alignments. Not used in final manuscript.
large-scale dataset (D. pseudoobscura female)	Dpse female thorax replicate 4 gene-level read counts based on STAR alignments and FlyBase 2017_03 annotation	NCBI GEO; This paper	NCBI GEO GSE99574:GSM2817265_dpse_TX_f_r4.htseq_reverse.txt.gz	Based on alternative STAR alignments. Not used in final manuscript.
large-scale dataset (D. pseudoobscura female)	Dpse female whole organism replicate 1 gene-level read counts based on STAR alignments and FlyBase 2017_03 annotation	NCBI GEO; This paper	NCBI GEO GSE99574:GSM2647122_dpse_WB_f_r1.htseq_reverse.txt.gz	Based on alternative STAR alignments. Not used in final manuscript.
large-scale dataset (D. pseudoobscura female)	Dpse female whole organism replicate 2 gene-level read counts based on STAR alignments and FlyBase 2017_03 annotation	NCBI GEO; This paper	NCBI GEO GSE99574:GSM2647123_dpse_WB_f_r2.htseq_reverse.txt.gz	Based on alternative STAR alignments. Not used in final manuscript.
large-scale dataset (D. pseudoobscura female)	Dpse female whole organism replicate 3 gene-level read counts based on STAR alignments and FlyBase 2017_03 annotation	NCBI GEO; This paper	NCBI GEO GSE99574:GSM2647124_dpse_WB_f_r3.htseq_reverse.txt.gz	Based on alternative STAR alignments. Not used in final manuscript.
large-scale dataset (D. pseudoobscura female)	Dpse female whole organism replicate 4 gene-level read counts based on STAR alignments and FlyBase 2017_03 annotation	NCBI GEO; This paper	NCBI GEO GSE99574:GSM2817267_dpse_WB_f_r4.htseq_reverse.txt.gz	Based on alternative STAR alignments. Not used in final manuscript.
large-scale dataset (D. pseudoobscura male)	Dpse male abdomen replicate 1 gene-level read counts based on STAR alignments and FlyBase 2017_03 annotation	NCBI GEO; This paper	NCBI GEO GSE99574:GSM2647089_dpse_AC_m_r1.htseq_reverse.txt.gz	Based on alternative STAR alignments. Not used in final manuscript.
large-scale dataset (D. pseudoobscura male)	Dpse male abdomen replicate 2 gene-level read counts based on STAR alignments and FlyBase 2017_03 annotation	NCBI GEO; This paper	NCBI GEO GSE99574:GSM2647090_dpse_AC_m_r2.htseq_reverse.txt.gz	Based on alternative STAR alignments. Not used in final manuscript.
large-scale dataset (D. pseudoobscura male)	Dpse male abdomen replicate 3 gene-level read counts based on STAR alignments and FlyBase 2017_03 annotation	NCBI GEO; This paper	NCBI GEO GSE99574:GSM2647091_dpse_AC_m_r3.htseq_reverse.txt.gz	Based on alternative STAR alignments. Not used in final manuscript.
large-scale dataset (D. pseudoobscura male)	Dpse male abdomen replicate 4 gene-level read counts based on STAR alignments and FlyBase 2017_03 annotation	NCBI GEO; This paper	NCBI GEO GSE99574:GSM2817256_dpse_AC_m_r4.htseq_reverse.txt.gz	Based on alternative STAR alignments. Not used in final manuscript.
large-scale dataset (D. pseudoobscura male)	Dpse male viscera replicate 1 gene-level read counts based on STAR alignments and FlyBase 2017_03 annotation	NCBI GEO; This paper	NCBI GEO GSE99574:GSM2647095_dpse_DG_m_r1.htseq_reverse.txt.gz	Based on alternative STAR alignments. Not used in final manuscript.
large-scale dataset (D. pseudoobscura male)	Dpse male viscera replicate 2 gene-level read counts based on STAR alignments and FlyBase 2017_03 annotation	NCBI GEO; This paper	NCBI GEO GSE99574:GSM2647096_dpse_DG_m_r2.htseq_reverse.txt.gz	Based on alternative STAR alignments. Not used in final manuscript.
large-scale dataset (D. pseudoobscura male)	Dpse male viscera replicate 3 gene-level read counts based on STAR alignments and FlyBase 2017_03 annotation	NCBI GEO; This paper	NCBI GEO GSE99574:GSM2647097_dpse_DG_m_r3.htseq_reverse.txt.gz	Based on alternative STAR alignments. Not used in final manuscript.
large-scale dataset (D. pseudoobscura male)	Dpse male viscera replicate 4 gene-level read counts based on STAR alignments and FlyBase 2017_03 annotation	NCBI GEO; This paper	NCBI GEO GSE99574:GSM2817258_dpse_DG_m_r4.htseq_reverse.txt.gz	Based on alternative STAR alignments. Not used in final manuscript.
large-scale dataset (D. pseudoobscura male)	Dpse male gonad replicate 1 gene-level read counts based on STAR alignments and FlyBase 2017_03 annotation	NCBI GEO; This paper	NCBI GEO GSE99574:GSM2647101_dpse_GO_m_r1.htseq_reverse.txt.gz	Based on alternative STAR alignments. Not used in final manuscript.
large-scale dataset (D. pseudoobscura male)	Dpse male gonad replicate 2 gene-level read counts based on STAR alignments and FlyBase 2017_03 annotation	NCBI GEO; This paper	NCBI GEO GSE99574:GSM2647102_dpse_GO_m_r2.htseq_reverse.txt.gz	Based on alternative STAR alignments. Not used in final manuscript.
large-scale dataset (D. pseudoobscura male)	Dpse male gonad replicate 3 gene-level read counts based on STAR alignments and FlyBase 2017_03 annotation	NCBI GEO; This paper	NCBI GEO GSE99574:GSM2647103_dpse_GO_m_r3.htseq_reverse.txt.gz	Based on alternative STAR alignments. Not used in final manuscript.
large-scale dataset (D. pseudoobscura male)	Dpse male gonad replicate 4 gene-level read counts based on STAR alignments and FlyBase 2017_03 annotation	NCBI GEO; This paper	NCBI GEO GSE99574:GSM2817260_dpse_GO_m_r4.htseq_reverse.txt.gz	Based on alternative STAR alignments. Not used in final manuscript.
large-scale dataset (D. pseudoobscura male)	Dpse male head replicate 1 gene-level read counts based on STAR alignments and FlyBase 2017_03 annotation	NCBI GEO; This paper	NCBI GEO GSE99574:GSM2647107_dpse_HD_m_r1.htseq_reverse.txt.gz	Based on alternative STAR alignments. Not used in final manuscript.
large-scale dataset (D. pseudoobscura male)	Dpse male head replicate 2 gene-level read counts based on STAR alignments and FlyBase 2017_03 annotation	NCBI GEO; This paper	NCBI GEO GSE99574:GSM2647108_dpse_HD_m_r2.htseq_reverse.txt.gz	Based on alternative STAR alignments. Not used in final manuscript.
large-scale dataset (D. pseudoobscura male)	Dpse male head replicate 3 gene-level read counts based on STAR alignments and FlyBase 2017_03 annotation	NCBI GEO; This paper	NCBI GEO GSE99574:GSM2647109_dpse_HD_m_r3.htseq_reverse.txt.gz	Based on alternative STAR alignments. Not used in final manuscript.
large-scale dataset (D. pseudoobscura male)	Dpse male head replicate 4 gene-level read counts based on STAR alignments and FlyBase 2017_03 annotation	NCBI GEO; This paper	NCBI GEO GSE99574:GSM2817262_dpse_HD_m_r4.htseq_reverse.txt.gz	Based on alternative STAR alignments. Not used in final manuscript.
large-scale dataset (D. pseudoobscura male)	Dpse male reproductive tract replicate 1 gene-level read counts based on STAR alignments and FlyBase 2017_03 annotation	NCBI GEO; This paper	NCBI GEO GSE99574:GSM2647113_dpse_RE_m_r1.htseq_reverse.txt.gz	Based on alternative STAR alignments. Not used in final manuscript.
large-scale dataset (D. pseudoobscura male)	Dpse male reproductive tract replicate 2 gene-level read counts based on STAR alignments and FlyBase 2017_03 annotation	NCBI GEO; This paper	NCBI GEO GSE99574:GSM2647114_dpse_RE_m_r2.htseq_reverse.txt.gz	Based on alternative STAR alignments. Not used in final manuscript.
large-scale dataset (D. pseudoobscura male)	Dpse male reproductive tract replicate 3 gene-level read counts based on STAR alignments and FlyBase 2017_03 annotation	NCBI GEO; This paper	NCBI GEO GSE99574:GSM2647115_dpse_RE_m_r3.htseq_reverse.txt.gz	Based on alternative STAR alignments. Not used in final manuscript.
large-scale dataset (D. pseudoobscura male)	Dpse male reproductive tract replicate 4 gene-level read counts based on STAR alignments and FlyBase 2017_03 annotation	NCBI GEO; This paper	NCBI GEO GSE99574:GSM2817264_dpse_RE_m_r4.htseq_reverse.txt.gz	Based on alternative STAR alignments. Not used in final manuscript.
large-scale dataset (D. pseudoobscura male)	Dpse male thorax replicate 1 gene-level read counts based on STAR alignments and FlyBase 2017_03 annotation	NCBI GEO; This paper	NCBI GEO GSE99574:GSM2647119_dpse_TX_m_r1.htseq_reverse.txt.gz	Based on alternative STAR alignments. Not used in final manuscript.
large-scale dataset (D. pseudoobscura male)	Dpse male thorax replicate 2 gene-level read counts based on STAR alignments and FlyBase 2017_03 annotation	NCBI GEO; This paper	NCBI GEO GSE99574:GSM2647120_dpse_TX_m_r2.htseq_reverse.txt.gz	Based on alternative STAR alignments. Not used in final manuscript.
large-scale dataset (D. pseudoobscura male)	Dpse male thorax replicate 3 gene-level read counts based on STAR alignments and FlyBase 2017_03 annotation	NCBI GEO; This paper	NCBI GEO GSE99574:GSM2647121_dpse_TX_m_r3.htseq_reverse.txt.gz	Based on alternative STAR alignments. Not used in final manuscript.
large-scale dataset (D. pseudoobscura male)	Dpse male thorax replicate 4 gene-level read counts based on STAR alignments and FlyBase 2017_03 annotation	NCBI GEO; This paper	NCBI GEO GSE99574:GSM2817266_dpse_TX_m_r4.htseq_reverse.txt.gz	Based on alternative STAR alignments. Not used in final manuscript.
large-scale dataset (D. pseudoobscura male)	Dpse male whole organism replicate 1 gene-level read counts based on STAR alignments and FlyBase 2017_03 annotation	NCBI GEO; This paper	NCBI GEO GSE99574:GSM2647125_dpse_WB_m_r1.htseq_reverse.txt.gz	Based on alternative STAR alignments. Not used in final manuscript.
large-scale dataset (D. pseudoobscura male)	Dpse male whole organism replicate 2 gene-level read counts based on STAR alignments and FlyBase 2017_03 annotation	NCBI GEO; This paper	NCBI GEO GSE99574:GSM2647126_dpse_WB_m_r2.htseq_reverse.txt.gz	Based on alternative STAR alignments. Not used in final manuscript.
large-scale dataset (D. pseudoobscura male)	Dpse male whole organism replicate 3 gene-level read counts based on STAR alignments and FlyBase 2017_03 annotation	NCBI GEO; This paper	NCBI GEO GSE99574:GSM2647127_dpse_WB_m_r3.htseq_reverse.txt.gz	Based on alternative STAR alignments. Not used in final manuscript.
large-scale dataset (D. pseudoobscura male)	Dpse male whole organism replicate 4 gene-level read counts based on STAR alignments and FlyBase 2017_03 annotation	NCBI GEO; This paper	NCBI GEO GSE99574:GSM2817268_dpse_WB_m_r4.htseq_reverse.txt.gz	Based on alternative STAR alignments. Not used in final manuscript.
large-scale dataset (D. virilis female)	Dvir female abdomen replicate 1 gene-level read counts based on STAR alignments and FlyBase 2017_03 annotation	NCBI GEO; This paper	NCBI GEO GSE99574:GSM2647128_dvir_AC_f_r1.htseq_reverse.txt.gz	Based on alternative STAR alignments. Not used in final manuscript.
large-scale dataset (D. virilis female)	Dvir female abdomen replicate 2 gene-level read counts based on STAR alignments and FlyBase 2017_03 annotation	NCBI GEO; This paper	NCBI GEO GSE99574:GSM2647129_dvir_AC_f_r2.htseq_reverse.txt.gz	Based on alternative STAR alignments. Not used in final manuscript.
large-scale dataset (D. virilis female)	Dvir female abdomen replicate 3 gene-level read counts based on STAR alignments and FlyBase 2017_03 annotation	NCBI GEO; This paper	NCBI GEO GSE99574:GSM2647130_dvir_AC_f_r3.htseq_reverse.txt.gz	Based on alternative STAR alignments. Not used in final manuscript.
large-scale dataset (D. virilis female)	Dvir female abdomen replicate 4 gene-level read counts based on STAR alignments and FlyBase 2017_03 annotation	NCBI GEO; This paper	NCBI GEO GSE99574:GSM2817269_dvir_AC_f_r4.htseq_reverse.txt.gz	Based on alternative STAR alignments. Not used in final manuscript.
large-scale dataset (D. virilis female)	Dvir female viscera replicate 1 gene-level read counts based on STAR alignments and FlyBase 2017_03 annotation	NCBI GEO; This paper	NCBI GEO GSE99574:GSM2647134_dvir_DG_f_r1.htseq_reverse.txt.gz	Based on alternative STAR alignments. Not used in final manuscript.
large-scale dataset (D. virilis female)	Dvir female viscera replicate 2 gene-level read counts based on STAR alignments and FlyBase 2017_03 annotation	NCBI GEO; This paper	NCBI GEO GSE99574:GSM2647135_dvir_DG_f_r2.htseq_reverse.txt.gz	Based on alternative STAR alignments. Not used in final manuscript.
large-scale dataset (D. virilis female)	Dvir female viscera replicate 3 gene-level read counts based on STAR alignments and FlyBase 2017_03 annotation	NCBI GEO; This paper	NCBI GEO GSE99574:GSM2647136_dvir_DG_f_r3.htseq_reverse.txt.gz	Based on alternative STAR alignments. Not used in final manuscript.
large-scale dataset (D. virilis female)	Dvir female viscera replicate 4 gene-level read counts based on STAR alignments and FlyBase 2017_03 annotation	NCBI GEO; This paper	NCBI GEO GSE99574:GSM2817271_dvir_DG_f_r4.htseq_reverse.txt.gz	Based on alternative STAR alignments. Not used in final manuscript.
large-scale dataset (D. virilis female)	Dvir female gonad replicate 1 gene-level read counts based on STAR alignments and FlyBase 2017_03 annotation	NCBI GEO; This paper	NCBI GEO GSE99574:GSM2647140_dvir_GO_f_r1.htseq_reverse.txt.gz	Based on alternative STAR alignments. Not used in final manuscript.
large-scale dataset (D. virilis female)	Dvir female gonad replicate 2 gene-level read counts based on STAR alignments and FlyBase 2017_03 annotation	NCBI GEO; This paper	NCBI GEO GSE99574:GSM2647141_dvir_GO_f_r2.htseq_reverse.txt.gz	Based on alternative STAR alignments. Not used in final manuscript.
large-scale dataset (D. virilis female)	Dvir female gonad replicate 3 gene-level read counts based on STAR alignments and FlyBase 2017_03 annotation	NCBI GEO; This paper	NCBI GEO GSE99574:GSM2647142_dvir_GO_f_r3.htseq_reverse.txt.gz	Based on alternative STAR alignments. Not used in final manuscript.
large-scale dataset (D. virilis female)	Dvir female gonad replicate 4 gene-level read counts based on STAR alignments and FlyBase 2017_03 annotation	NCBI GEO; This paper	NCBI GEO GSE99574:GSM2817273_dvir_GO_f_r4.htseq_reverse.txt.gz	Based on alternative STAR alignments. Not used in final manuscript.
large-scale dataset (D. virilis female)	Dvir female head replicate 1 gene-level read counts based on STAR alignments and FlyBase 2017_03 annotation	NCBI GEO; This paper	NCBI GEO GSE99574:GSM2647146_dvir_HD_f_r1.htseq_reverse.txt.gz	Based on alternative STAR alignments. Not used in final manuscript.
large-scale dataset (D. virilis female)	Dvir female head replicate 2 gene-level read counts based on STAR alignments and FlyBase 2017_03 annotation	NCBI GEO; This paper	NCBI GEO GSE99574:GSM2647147_dvir_HD_f_r2.htseq_reverse.txt.gz	Based on alternative STAR alignments. Not used in final manuscript.
large-scale dataset (D. virilis female)	Dvir female head replicate 3 gene-level read counts based on STAR alignments and FlyBase 2017_03 annotation	NCBI GEO; This paper	NCBI GEO GSE99574:GSM2647148_dvir_HD_f_r3.htseq_reverse.txt.gz	Based on alternative STAR alignments. Not used in final manuscript.
large-scale dataset (D. virilis female)	Dvir female head replicate 4 gene-level read counts based on STAR alignments and FlyBase 2017_03 annotation	NCBI GEO; This paper	NCBI GEO GSE99574:GSM2817275_dvir_HD_f_r4.htseq_reverse.txt.gz	Based on alternative STAR alignments. Not used in final manuscript.
large-scale dataset (D. virilis female)	Dvir female reproductive tract replicate 1 gene-level read counts based on STAR alignments and FlyBase 2017_03 annotation	NCBI GEO; This paper	NCBI GEO GSE99574:GSM2647152_dvir_RE_f_r1.htseq_reverse.txt.gz	Based on alternative STAR alignments. Not used in final manuscript.
large-scale dataset (D. virilis female)	Dvir female reproductive tract replicate 2 gene-level read counts based on STAR alignments and FlyBase 2017_03 annotation	NCBI GEO; This paper	NCBI GEO GSE99574:GSM2647153_dvir_RE_f_r2.htseq_reverse.txt.gz	Based on alternative STAR alignments. Not used in final manuscript.
large-scale dataset (D. virilis female)	Dvir female reproductive tract replicate 3 gene-level read counts based on STAR alignments and FlyBase 2017_03 annotation	NCBI GEO; This paper	NCBI GEO GSE99574:GSM2647154_dvir_RE_f_r3.htseq_reverse.txt.gz	Based on alternative STAR alignments. Not used in final manuscript.
large-scale dataset (D. virilis female)	Dvir female reproductive tract replicate 4 gene-level read counts based on STAR alignments and FlyBase 2017_03 annotation	NCBI GEO; This paper	NCBI GEO GSE99574:GSM2817277_dvir_RE_f_r4.htseq_reverse.txt.gz	Based on alternative STAR alignments. Not used in final manuscript.
large-scale dataset (D. virilis female)	Dvir female thorax replicate 1 gene-level read counts based on STAR alignments and FlyBase 2017_03 annotation	NCBI GEO; This paper	NCBI GEO GSE99574:GSM2647158_dvir_TX_f_r1.htseq_reverse.txt.gz	Based on alternative STAR alignments. Not used in final manuscript.
large-scale dataset (D. virilis female)	Dvir female thorax replicate 2 gene-level read counts based on STAR alignments and FlyBase 2017_03 annotation	NCBI GEO; This paper	NCBI GEO GSE99574:GSM2647159_dvir_TX_f_r2.htseq_reverse.txt.gz	Based on alternative STAR alignments. Not used in final manuscript.
large-scale dataset (D. virilis female)	Dvir female thorax replicate 3 gene-level read counts based on STAR alignments and FlyBase 2017_03 annotation	NCBI GEO; This paper	NCBI GEO GSE99574:GSM2647160_dvir_TX_f_r3.htseq_reverse.txt.gz	Based on alternative STAR alignments. Not used in final manuscript.
large-scale dataset (D. virilis female)	Dvir female thorax replicate 4 gene-level read counts based on STAR alignments and FlyBase 2017_03 annotation	NCBI GEO; This paper	NCBI GEO GSE99574:GSM2817279_dvir_TX_f_r4.htseq_reverse.txt.gz	Based on alternative STAR alignments. Not used in final manuscript.
large-scale dataset (D. virilis female)	Dvir female whole organism replicate 1 gene-level read counts based on STAR alignments and FlyBase 2017_03 annotation	NCBI GEO; This paper	NCBI GEO GSE99574:GSM2647164_dvir_WB_f_r1.htseq_reverse.txt.gz	Based on alternative STAR alignments. Not used in final manuscript.
large-scale dataset (D. virilis female)	Dvir female whole organism replicate 2 gene-level read counts based on STAR alignments and FlyBase 2017_03 annotation	NCBI GEO; This paper	NCBI GEO GSE99574:GSM2647165_dvir_WB_f_r2.htseq_reverse.txt.gz	Based on alternative STAR alignments. Not used in final manuscript.
large-scale dataset (D. virilis female)	Dvir female whole organism replicate 3 gene-level read counts based on STAR alignments and FlyBase 2017_03 annotation	NCBI GEO; This paper	NCBI GEO GSE99574:GSM2647166_dvir_WB_f_r3.htseq_reverse.txt.gz	Based on alternative STAR alignments. Not used in final manuscript.
large-scale dataset (D. virilis female)	Dvir female whole organism replicate 4 gene-level read counts based on STAR alignments and FlyBase 2017_03 annotation	NCBI GEO; This paper	NCBI GEO GSE99574:GSM2817281_dvir_WB_f_r4.htseq_reverse.txt.gz	Based on alternative STAR alignments. Not used in final manuscript.
large-scale dataset (D. virilis male)	Dvir male abdomen replicate 1 gene-level read counts based on STAR alignments and FlyBase 2017_03 annotation	NCBI GEO; This paper	NCBI GEO GSE99574:GSM2647131_dvir_AC_m_r1.htseq_reverse.txt.gz	Based on alternative STAR alignments. Not used in final manuscript.
large-scale dataset (D. virilis male)	Dvir male abdomen replicate 2 gene-level read counts based on STAR alignments and FlyBase 2017_03 annotation	NCBI GEO; This paper	NCBI GEO GSE99574:GSM2647132_dvir_AC_m_r2.htseq_reverse.txt.gz	Based on alternative STAR alignments. Not used in final manuscript.
large-scale dataset (D. virilis male)	Dvir male abdomen replicate 3 gene-level read counts based on STAR alignments and FlyBase 2017_03 annotation	NCBI GEO; This paper	NCBI GEO GSE99574:GSM2647133_dvir_AC_m_r3.htseq_reverse.txt.gz	Based on alternative STAR alignments. Not used in final manuscript.
large-scale dataset (D. virilis male)	Dvir male abdomen replicate 4 gene-level read counts based on STAR alignments and FlyBase 2017_03 annotation	NCBI GEO; This paper	NCBI GEO GSE99574:GSM2817270_dvir_AC_m_r4.htseq_reverse.txt.gz	Based on alternative STAR alignments. Not used in final manuscript.
large-scale dataset (D. virilis male)	Dvir male viscera replicate 1 gene-level read counts based on STAR alignments and FlyBase 2017_03 annotation	NCBI GEO; This paper	NCBI GEO GSE99574:GSM2647137_dvir_DG_m_r1.htseq_reverse.txt.gz	Based on alternative STAR alignments. Not used in final manuscript.
large-scale dataset (D. virilis male)	Dvir male viscera replicate 2 gene-level read counts based on STAR alignments and FlyBase 2017_03 annotation	NCBI GEO; This paper	NCBI GEO GSE99574:GSM2647138_dvir_DG_m_r2.htseq_reverse.txt.gz	Based on alternative STAR alignments. Not used in final manuscript.
large-scale dataset (D. virilis male)	Dvir male viscera replicate 3 gene-level read counts based on STAR alignments and FlyBase 2017_03 annotation	NCBI GEO; This paper	NCBI GEO GSE99574:GSM2647139_dvir_DG_m_r3.htseq_reverse.txt.gz	Based on alternative STAR alignments. Not used in final manuscript.
large-scale dataset (D. virilis male)	Dvir male viscera replicate 4 gene-level read counts based on STAR alignments and FlyBase 2017_03 annotation	NCBI GEO; This paper	NCBI GEO GSE99574:GSM2817272_dvir_DG_m_r4.htseq_reverse.txt.gz	Based on alternative STAR alignments. Not used in final manuscript.
large-scale dataset (D. virilis male)	Dvir male gonad replicate 1 gene-level read counts based on STAR alignments and FlyBase 2017_03 annotation	NCBI GEO; This paper	NCBI GEO GSE99574:GSM2647143_dvir_GO_m_r1.htseq_reverse.txt.gz	Based on alternative STAR alignments. Not used in final manuscript.
large-scale dataset (D. virilis male)	Dvir male gonad replicate 2 gene-level read counts based on STAR alignments and FlyBase 2017_03 annotation	NCBI GEO; This paper	NCBI GEO GSE99574:GSM2647144_dvir_GO_m_r2.htseq_reverse.txt.gz	Based on alternative STAR alignments. Not used in final manuscript.
large-scale dataset (D. virilis male)	Dvir male gonad replicate 3 gene-level read counts based on STAR alignments and FlyBase 2017_03 annotation	NCBI GEO; This paper	NCBI GEO GSE99574:GSM2647145_dvir_GO_m_r3.htseq_reverse.txt.gz	Based on alternative STAR alignments. Not used in final manuscript.
large-scale dataset (D. virilis male)	Dvir male gonad replicate 4 gene-level read counts based on STAR alignments and FlyBase 2017_03 annotation	NCBI GEO; This paper	NCBI GEO GSE99574:GSM2817274_dvir_GO_m_r4.htseq_reverse.txt.gz	Based on alternative STAR alignments. Not used in final manuscript.
large-scale dataset (D. virilis male)	Dvir male head replicate 1 gene-level read counts based on STAR alignments and FlyBase 2017_03 annotation	NCBI GEO; This paper	NCBI GEO GSE99574:GSM2647149_dvir_HD_m_r1.htseq_reverse.txt.gz	Based on alternative STAR alignments. Not used in final manuscript.
large-scale dataset (D. virilis male)	Dvir male head replicate 2 gene-level read counts based on STAR alignments and FlyBase 2017_03 annotation	NCBI GEO; This paper	NCBI GEO GSE99574:GSM2647150_dvir_HD_m_r2.htseq_reverse.txt.gz	Based on alternative STAR alignments. Not used in final manuscript.
large-scale dataset (D. virilis male)	Dvir male head replicate 3 gene-level read counts based on STAR alignments and FlyBase 2017_03 annotation	NCBI GEO; This paper	NCBI GEO GSE99574:GSM2647151_dvir_HD_m_r3.htseq_reverse.txt.gz	Based on alternative STAR alignments. Not used in final manuscript.
large-scale dataset (D. virilis male)	Dvir male head replicate 4 gene-level read counts based on STAR alignments and FlyBase 2017_03 annotation	NCBI GEO; This paper	NCBI GEO GSE99574:GSM2817276_dvir_HD_m_r4.htseq_reverse.txt.gz	Based on alternative STAR alignments. Not used in final manuscript.
large-scale dataset (D. virilis male)	Dvir male reproductive tract replicate 1 gene-level read counts based on STAR alignments and FlyBase 2017_03 annotation	NCBI GEO; This paper	NCBI GEO GSE99574:GSM2647155_dvir_RE_m_r1.htseq_reverse.txt.gz	Based on alternative STAR alignments. Not used in final manuscript.
large-scale dataset (D. virilis male)	Dvir male reproductive tract replicate 2 gene-level read counts based on STAR alignments and FlyBase 2017_03 annotation	NCBI GEO; This paper	NCBI GEO GSE99574:GSM2647156_dvir_RE_m_r2.htseq_reverse.txt.gz	Based on alternative STAR alignments. Not used in final manuscript.
large-scale dataset (D. virilis male)	Dvir male reproductive tract replicate 3 gene-level read counts based on STAR alignments and FlyBase 2017_03 annotation	NCBI GEO; This paper	NCBI GEO GSE99574:GSM2647157_dvir_RE_m_r3.htseq_reverse.txt.gz	Based on alternative STAR alignments. Not used in final manuscript.
large-scale dataset (D. virilis male)	Dvir male reproductive tract replicate 4 gene-level read counts based on STAR alignments and FlyBase 2017_03 annotation	NCBI GEO; This paper	NCBI GEO GSE99574:GSM2817278_dvir_RE_m_r4.htseq_reverse.txt.gz	Based on alternative STAR alignments. Not used in final manuscript.
large-scale dataset (D. virilis male)	Dvir male thorax replicate 1 gene-level read counts based on STAR alignments and FlyBase 2017_03 annotation	NCBI GEO; This paper	NCBI GEO GSE99574:GSM2647161_dvir_TX_m_r1.htseq_reverse.txt.gz	Based on alternative STAR alignments. Not used in final manuscript.
large-scale dataset (D. virilis male)	Dvir male thorax replicate 2 gene-level read counts based on STAR alignments and FlyBase 2017_03 annotation	NCBI GEO; This paper	NCBI GEO GSE99574:GSM2647162_dvir_TX_m_r2.htseq_reverse.txt.gz	Based on alternative STAR alignments. Not used in final manuscript.
large-scale dataset (D. virilis male)	Dvir male thorax replicate 3 gene-level read counts based on STAR alignments and FlyBase 2017_03 annotation	NCBI GEO; This paper	NCBI GEO GSE99574:GSM2647163_dvir_TX_m_r3.htseq_reverse.txt.gz	Based on alternative STAR alignments. Not used in final manuscript.
large-scale dataset (D. virilis male)	Dvir male thorax replicate 4 gene-level read counts based on STAR alignments and FlyBase 2017_03 annotation	NCBI GEO; This paper	NCBI GEO GSE99574:GSM2817280_dvir_TX_m_r4.htseq_reverse.txt.gz	Based on alternative STAR alignments. Not used in final manuscript.
large-scale dataset (D. virilis male)	Dvir male whole organism replicate 1 gene-level read counts based on STAR alignments and FlyBase 2017_03 annotation	NCBI GEO; This paper	NCBI GEO GSE99574:GSM2647167_dvir_WB_m_r1.htseq_reverse.txt.gz	Based on alternative STAR alignments. Not used in final manuscript.
large-scale dataset (D. virilis male)	Dvir male whole organism replicate 2 gene-level read counts based on STAR alignments and FlyBase 2017_03 annotation	NCBI GEO; This paper	NCBI GEO GSE99574:GSM2647168_dvir_WB_m_r2.htseq_reverse.txt.gz	Based on alternative STAR alignments. Not used in final manuscript.
large-scale dataset (D. virilis male)	Dvir male whole organism replicate 3 gene-level read counts based on STAR alignments and FlyBase 2017_03 annotation	NCBI GEO; This paper	NCBI GEO GSE99574:GSM2647169_dvir_WB_m_r3.htseq_reverse.txt.gz	Based on alternative STAR alignments. Not used in final manuscript.
large-scale dataset (D. virilis male)	Dvir male whole organism replicate 4 gene-level read counts based on STAR alignments and FlyBase 2017_03 annotation	NCBI GEO; This paper	NCBI GEO GSE99574:GSM2817282_dvir_WB_m_r4.htseq_reverse.txt.gz	Based on alternative STAR alignments. Not used in final manuscript.
large-scale dataset (D. willistoni female)	Dwil female abdomen replicate 1 gene-level read counts based on STAR alignments and FlyBase 2017_03 annotation	NCBI GEO; This paper	NCBI GEO GSE99574:GSM2647170_dwil_AC_f_r1.htseq_reverse.txt.gz	Based on alternative STAR alignments. Not used in final manuscript.
large-scale dataset (D. willistoni female)	Dwil female abdomen replicate 2 gene-level read counts based on STAR alignments and FlyBase 2017_03 annotation	NCBI GEO; This paper	NCBI GEO GSE99574:GSM2647171_dwil_AC_f_r2.htseq_reverse.txt.gz	Based on alternative STAR alignments. Not used in final manuscript.
large-scale dataset (D. willistoni female)	Dwil female abdomen replicate 3 gene-level read counts based on STAR alignments and FlyBase 2017_03 annotation	NCBI GEO; This paper	NCBI GEO GSE99574:GSM2647172_dwil_AC_f_r3.htseq_reverse.txt.gz	Based on alternative STAR alignments. Not used in final manuscript.
large-scale dataset (D. willistoni female)	Dwil female abdomen replicate 4 gene-level read counts based on STAR alignments and FlyBase 2017_03 annotation	NCBI GEO; This paper	NCBI GEO GSE99574:GSM2817283_dwil_AC_f_r4.htseq_reverse.txt.gz	Based on alternative STAR alignments. Not used in final manuscript.
large-scale dataset (D. willistoni female)	Dwil female viscera replicate 1 gene-level read counts based on STAR alignments and FlyBase 2017_03 annotation	NCBI GEO; This paper	NCBI GEO GSE99574:GSM2647176_dwil_DG_f_r1.htseq_reverse.txt.gz	Based on alternative STAR alignments. Not used in final manuscript.
large-scale dataset (D. willistoni female)	Dwil female viscera replicate 2 gene-level read counts based on STAR alignments and FlyBase 2017_03 annotation	NCBI GEO; This paper	NCBI GEO GSE99574:GSM2647177_dwil_DG_f_r2.htseq_reverse.txt.gz	Based on alternative STAR alignments. Not used in final manuscript.
large-scale dataset (D. willistoni female)	Dwil female viscera replicate 3 gene-level read counts based on STAR alignments and FlyBase 2017_03 annotation	NCBI GEO; This paper	NCBI GEO GSE99574:GSM2647178_dwil_DG_f_r3.htseq_reverse.txt.gz	Based on alternative STAR alignments. Not used in final manuscript.
large-scale dataset (D. willistoni female)	Dwil female viscera replicate 4 gene-level read counts based on STAR alignments and FlyBase 2017_03 annotation	NCBI GEO; This paper	NCBI GEO GSE99574:GSM2817285_dwil_DG_f_r4.htseq_reverse.txt.gz	Based on alternative STAR alignments. Not used in final manuscript.
large-scale dataset (D. willistoni female)	Dwil female gonad replicate 1 gene-level read counts based on STAR alignments and FlyBase 2017_03 annotation	NCBI GEO; This paper	NCBI GEO GSE99574:GSM2647182_dwil_GO_f_r1.htseq_reverse.txt.gz	Based on alternative STAR alignments. Not used in final manuscript.
large-scale dataset (D. willistoni female)	Dwil female gonad replicate 2 gene-level read counts based on STAR alignments and FlyBase 2017_03 annotation	NCBI GEO; This paper	NCBI GEO GSE99574:GSM2647183_dwil_GO_f_r2.htseq_reverse.txt.gz	Based on alternative STAR alignments. Not used in final manuscript.
large-scale dataset (D. willistoni female)	Dwil female gonad replicate 3 gene-level read counts based on STAR alignments and FlyBase 2017_03 annotation	NCBI GEO; This paper	NCBI GEO GSE99574:GSM2647184_dwil_GO_f_r3.htseq_reverse.txt.gz	Based on alternative STAR alignments. Not used in final manuscript.
large-scale dataset (D. willistoni female)	Dwil female gonad replicate 4 gene-level read counts based on STAR alignments and FlyBase 2017_03 annotation	NCBI GEO; This paper	NCBI GEO GSE99574:GSM2817287_dwil_GO_f_r4.htseq_reverse.txt.gz	Based on alternative STAR alignments. Not used in final manuscript.
large-scale dataset (D. willistoni female)	Dwil female head replicate 1 gene-level read counts based on STAR alignments and FlyBase 2017_03 annotation	NCBI GEO; This paper	NCBI GEO GSE99574:GSM2647188_dwil_HD_f_r1.htseq_reverse.txt.gz	Based on alternative STAR alignments. Not used in final manuscript.
large-scale dataset (D. willistoni female)	Dwil female head replicate 2 gene-level read counts based on STAR alignments and FlyBase 2017_03 annotation	NCBI GEO; This paper	NCBI GEO GSE99574:GSM2647189_dwil_HD_f_r2.htseq_reverse.txt.gz	Based on alternative STAR alignments. Not used in final manuscript.
large-scale dataset (D. willistoni female)	Dwil female head replicate 3 gene-level read counts based on STAR alignments and FlyBase 2017_03 annotation	NCBI GEO; This paper	NCBI GEO GSE99574:GSM2647190_dwil_HD_f_r3.htseq_reverse.txt.gz	Based on alternative STAR alignments. Not used in final manuscript.
large-scale dataset (D. willistoni female)	Dwil female head replicate 4 gene-level read counts based on STAR alignments and FlyBase 2017_03 annotation	NCBI GEO; This paper	NCBI GEO GSE99574:GSM2817289_dwil_HD_f_r4.htseq_reverse.txt.gz	Based on alternative STAR alignments. Not used in final manuscript.
large-scale dataset (D. willistoni female)	Dwil female reproductive tract replicate 1 gene-level read counts based on STAR alignments and FlyBase 2017_03 annotation	NCBI GEO; This paper	NCBI GEO GSE99574:GSM2647194_dwil_RE_f_r1.htseq_reverse.txt.gz	Based on alternative STAR alignments. Not used in final manuscript.
large-scale dataset (D. willistoni female)	Dwil female reproductive tract replicate 2 gene-level read counts based on STAR alignments and FlyBase 2017_03 annotation	NCBI GEO; This paper	NCBI GEO GSE99574:GSM2647195_dwil_RE_f_r2.htseq_reverse.txt.gz	Based on alternative STAR alignments. Not used in final manuscript.
large-scale dataset (D. willistoni female)	Dwil female reproductive tract replicate 3 gene-level read counts based on STAR alignments and FlyBase 2017_03 annotation	NCBI GEO; This paper	NCBI GEO GSE99574:GSM2647196_dwil_RE_f_r3.htseq_reverse.txt.gz	Based on alternative STAR alignments. Not used in final manuscript.
large-scale dataset (D. willistoni female)	Dwil female reproductive tract replicate 4 gene-level read counts based on STAR alignments and FlyBase 2017_03 annotation	NCBI GEO; This paper	NCBI GEO GSE99574:GSM2817291_dwil_RE_f_r4.htseq_reverse.txt.gz	Based on alternative STAR alignments. Not used in final manuscript.
large-scale dataset (D. willistoni female)	Dwil female thorax replicate 1 gene-level read counts based on STAR alignments and FlyBase 2017_03 annotation	NCBI GEO; This paper	NCBI GEO GSE99574:GSM2647200_dwil_TX_f_r1.htseq_reverse.txt.gz	Based on alternative STAR alignments. Not used in final manuscript.
large-scale dataset (D. willistoni female)	Dwil female thorax replicate 2 gene-level read counts based on STAR alignments and FlyBase 2017_03 annotation	NCBI GEO; This paper	NCBI GEO GSE99574:GSM2647201_dwil_TX_f_r2.htseq_reverse.txt.gz	Based on alternative STAR alignments. Not used in final manuscript.
large-scale dataset (D. willistoni female)	Dwil female thorax replicate 3 gene-level read counts based on STAR alignments and FlyBase 2017_03 annotation	NCBI GEO; This paper	NCBI GEO GSE99574:GSM2647202_dwil_TX_f_r3.htseq_reverse.txt.gz	Based on alternative STAR alignments. Not used in final manuscript.
large-scale dataset (D. willistoni female)	Dwil female thorax replicate 4 gene-level read counts based on STAR alignments and FlyBase 2017_03 annotation	NCBI GEO; This paper	NCBI GEO GSE99574:GSM2817293_dwil_TX_f_r4.htseq_reverse.txt.gz	Based on alternative STAR alignments. Not used in final manuscript.
large-scale dataset (D. willistoni female)	Dwil female whole organism replicate 1 gene-level read counts based on STAR alignments and FlyBase 2017_03 annotation	NCBI GEO; This paper	NCBI GEO GSE99574:GSM2647206_dwil_WB_f_r1.htseq_reverse.txt.gz	Based on alternative STAR alignments. Not used in final manuscript.
large-scale dataset (D. willistoni female)	Dwil female whole organism replicate 2 gene-level read counts based on STAR alignments and FlyBase 2017_03 annotation	NCBI GEO; This paper	NCBI GEO GSE99574:GSM2647207_dwil_WB_f_r2.htseq_reverse.txt.gz	Based on alternative STAR alignments. Not used in final manuscript.
large-scale dataset (D. willistoni female)	Dwil female whole organism replicate 3 gene-level read counts based on STAR alignments and FlyBase 2017_03 annotation	NCBI GEO; This paper	NCBI GEO GSE99574:GSM2647208_dwil_WB_f_r3.htseq_reverse.txt.gz	Based on alternative STAR alignments. Not used in final manuscript.
large-scale dataset (D. willistoni female)	Dwil female whole organism replicate 4 gene-level read counts based on STAR alignments and FlyBase 2017_03 annotation	NCBI GEO; This paper	NCBI GEO GSE99574:GSM2817295_dwil_WB_f_r4.htseq_reverse.txt.gz	Based on alternative STAR alignments. Not used in final manuscript.
large-scale dataset (D. willistoni male)	Dwil male abdomen replicate 1 gene-level read counts based on STAR alignments and FlyBase 2017_03 annotation	NCBI GEO; This paper	NCBI GEO GSE99574:GSM2647173_dwil_AC_m_r1.htseq_reverse.txt.gz	Based on alternative STAR alignments. Not used in final manuscript.
large-scale dataset (D. willistoni male)	Dwil male abdomen replicate 2 gene-level read counts based on STAR alignments and FlyBase 2017_03 annotation	NCBI GEO; This paper	NCBI GEO GSE99574:GSM2647174_dwil_AC_m_r2.htseq_reverse.txt.gz	Based on alternative STAR alignments. Not used in final manuscript.
large-scale dataset (D. willistoni male)	Dwil male abdomen replicate 3 gene-level read counts based on STAR alignments and FlyBase 2017_03 annotation	NCBI GEO; This paper	NCBI GEO GSE99574:GSM2647175_dwil_AC_m_r3.htseq_reverse.txt.gz	Based on alternative STAR alignments. Not used in final manuscript.
large-scale dataset (D. willistoni male)	Dwil male abdomen replicate 4 gene-level read counts based on STAR alignments and FlyBase 2017_03 annotation	NCBI GEO; This paper	NCBI GEO GSE99574:GSM2817284_dwil_AC_m_r4.htseq_reverse.txt.gz	Based on alternative STAR alignments. Not used in final manuscript.
large-scale dataset (D. willistoni male)	Dwil male viscera replicate 1 gene-level read counts based on STAR alignments and FlyBase 2017_03 annotation	NCBI GEO; This paper	NCBI GEO GSE99574:GSM2647179_dwil_DG_m_r1.htseq_reverse.txt.gz	Based on alternative STAR alignments. Not used in final manuscript.
large-scale dataset (D. willistoni male)	Dwil male viscera replicate 2 gene-level read counts based on STAR alignments and FlyBase 2017_03 annotation	NCBI GEO; This paper	NCBI GEO GSE99574:GSM2647180_dwil_DG_m_r2.htseq_reverse.txt.gz	Based on alternative STAR alignments. Not used in final manuscript.
large-scale dataset (D. willistoni male)	Dwil male viscera replicate 3 gene-level read counts based on STAR alignments and FlyBase 2017_03 annotation	NCBI GEO; This paper	NCBI GEO GSE99574:GSM2647181_dwil_DG_m_r3.htseq_reverse.txt.gz	Based on alternative STAR alignments. Not used in final manuscript.
large-scale dataset (D. willistoni male)	Dwil male viscera replicate 4 gene-level read counts based on STAR alignments and FlyBase 2017_03 annotation	NCBI GEO; This paper	NCBI GEO GSE99574:GSM2817286_dwil_DG_m_r4.htseq_reverse.txt.gz	Based on alternative STAR alignments. Not used in final manuscript.
large-scale dataset (D. willistoni male)	Dwil male gonad replicate 1 gene-level read counts based on STAR alignments and FlyBase 2017_03 annotation	NCBI GEO; This paper	NCBI GEO GSE99574:GSM2647185_dwil_GO_m_r1.htseq_reverse.txt.gz	Based on alternative STAR alignments. Not used in final manuscript.
large-scale dataset (D. willistoni male)	Dwil male gonad replicate 2 gene-level read counts based on STAR alignments and FlyBase 2017_03 annotation	NCBI GEO; This paper	NCBI GEO GSE99574:GSM2647186_dwil_GO_m_r2.htseq_reverse.txt.gz	Based on alternative STAR alignments. Not used in final manuscript.
large-scale dataset (D. willistoni male)	Dwil male gonad replicate 3 gene-level read counts based on STAR alignments and FlyBase 2017_03 annotation	NCBI GEO; This paper	NCBI GEO GSE99574:GSM2647187_dwil_GO_m_r3.htseq_reverse.txt.gz	Based on alternative STAR alignments. Not used in final manuscript.
large-scale dataset (D. willistoni male)	Dwil male gonad replicate 4 gene-level read counts based on STAR alignments and FlyBase 2017_03 annotation	NCBI GEO; This paper	NCBI GEO GSE99574:GSM2817288_dwil_GO_m_r4.htseq_reverse.txt.gz	Based on alternative STAR alignments. Not used in final manuscript.
large-scale dataset (D. willistoni male)	Dwil male head replicate 1 gene-level read counts based on STAR alignments and FlyBase 2017_03 annotation	NCBI GEO; This paper	NCBI GEO GSE99574:GSM2647191_dwil_HD_m_r1.htseq_reverse.txt.gz	Based on alternative STAR alignments. Not used in final manuscript.
large-scale dataset (D. willistoni male)	Dwil male head replicate 2 gene-level read counts based on STAR alignments and FlyBase 2017_03 annotation	NCBI GEO; This paper	NCBI GEO GSE99574:GSM2647192_dwil_HD_m_r2.htseq_reverse.txt.gz	Based on alternative STAR alignments. Not used in final manuscript.
large-scale dataset (D. willistoni male)	Dwil male head replicate 3 gene-level read counts based on STAR alignments and FlyBase 2017_03 annotation	NCBI GEO; This paper	NCBI GEO GSE99574:GSM2647193_dwil_HD_m_r3.htseq_reverse.txt.gz	Based on alternative STAR alignments. Not used in final manuscript.
large-scale dataset (D. willistoni male)	Dwil male head replicate 4 gene-level read counts based on STAR alignments and FlyBase 2017_03 annotation	NCBI GEO; This paper	NCBI GEO GSE99574:GSM2817290_dwil_HD_m_r4.htseq_reverse.txt.gz	Based on alternative STAR alignments. Not used in final manuscript.
large-scale dataset (D. willistoni male)	Dwil male reproductive tract replicate 1 gene-level read counts based on STAR alignments and FlyBase 2017_03 annotation	NCBI GEO; This paper	NCBI GEO GSE99574:GSM2647197_dwil_RE_m_r1.htseq_reverse.txt.gz	Based on alternative STAR alignments. Not used in final manuscript.
large-scale dataset (D. willistoni male)	Dwil male reproductive tract replicate 2 gene-level read counts based on STAR alignments and FlyBase 2017_03 annotation	NCBI GEO; This paper	NCBI GEO GSE99574:GSM2647198_dwil_RE_m_r2.htseq_reverse.txt.gz	Based on alternative STAR alignments. Not used in final manuscript.
large-scale dataset (D. willistoni male)	Dwil male reproductive tract replicate 3 gene-level read counts based on STAR alignments and FlyBase 2017_03 annotation	NCBI GEO; This paper	NCBI GEO GSE99574:GSM2647199_dwil_RE_m_r3.htseq_reverse.txt.gz	Based on alternative STAR alignments. Not used in final manuscript.
large-scale dataset (D. willistoni male)	Dwil male reproductive tract replicate 4 gene-level read counts based on STAR alignments and FlyBase 2017_03 annotation	NCBI GEO; This paper	NCBI GEO GSE99574:GSM2817292_dwil_RE_m_r4.htseq_reverse.txt.gz	Based on alternative STAR alignments. Not used in final manuscript.
large-scale dataset (D. willistoni male)	Dwil male thorax replicate 1 gene-level read counts based on STAR alignments and FlyBase 2017_03 annotation	NCBI GEO; This paper	NCBI GEO GSE99574:GSM2647203_dwil_TX_m_r1.htseq_reverse.txt.gz	Based on alternative STAR alignments. Not used in final manuscript.
large-scale dataset (D. willistoni male)	Dwil male thorax replicate 2 gene-level read counts based on STAR alignments and FlyBase 2017_03 annotation	NCBI GEO; This paper	NCBI GEO GSE99574:GSM2647204_dwil_TX_m_r2.htseq_reverse.txt.gz	Based on alternative STAR alignments. Not used in final manuscript.
large-scale dataset (D. willistoni male)	Dwil male thorax replicate 3 gene-level read counts based on STAR alignments and FlyBase 2017_03 annotation	NCBI GEO; This paper	NCBI GEO GSE99574:GSM2647205_dwil_TX_m_r3.htseq_reverse.txt.gz	Based on alternative STAR alignments. Not used in final manuscript.
large-scale dataset (D. willistoni male)	Dwil male thorax replicate 4 gene-level read counts based on STAR alignments and FlyBase 2017_03 annotation	NCBI GEO; This paper	NCBI GEO GSE99574:GSM2817294_dwil_TX_m_r4.htseq_reverse.txt.gz	Based on alternative STAR alignments. Not used in final manuscript.
large-scale dataset (D. willistoni male)	Dwil male whole organism replicate 1 gene-level read counts based on STAR alignments and FlyBase 2017_03 annotation	NCBI GEO; This paper	NCBI GEO GSE99574:GSM2647209_dwil_WB_m_r1.htseq_reverse.txt.gz	Based on alternative STAR alignments. Not used in final manuscript.
large-scale dataset (D. willistoni male)	Dwil male whole organism replicate 2 gene-level read counts based on STAR alignments and FlyBase 2017_03 annotation	NCBI GEO; This paper	NCBI GEO GSE99574:GSM2647210_dwil_WB_m_r2.htseq_reverse.txt.gz	Based on alternative STAR alignments. Not used in final manuscript.
large-scale dataset (D. willistoni male)	Dwil male whole organism replicate 3 gene-level read counts based on STAR alignments and FlyBase 2017_03 annotation	NCBI GEO; This paper	NCBI GEO GSE99574:GSM2647211_dwil_WB_m_r3.htseq_reverse.txt.gz	Based on alternative STAR alignments. Not used in final manuscript.
large-scale dataset (D. willistoni male)	Dwil male whole organism replicate 4 gene-level read counts based on STAR alignments and FlyBase 2017_03 annotation	NCBI GEO; This paper	NCBI GEO GSE99574:GSM2817296_dwil_WB_m_r4.htseq_reverse.txt.gz	Based on alternative STAR alignments. Not used in final manuscript.
large-scale dataset (D. yakuba female)	Dyak female abdomen replicate 1 gene-level read counts based on STAR alignments and FlyBase 2017_03 annotation	NCBI GEO; This paper	NCBI GEO GSE99574:GSM2647212_dyak_AC_f_r1.htseq_reverse.txt.gz	Based on alternative STAR alignments. Not used in final manuscript.
large-scale dataset (D. yakuba female)	Dyak female abdomen replicate 2 gene-level read counts based on STAR alignments and FlyBase 2017_03 annotation	NCBI GEO; This paper	NCBI GEO GSE99574:GSM2647213_dyak_AC_f_r2.htseq_reverse.txt.gz	Based on alternative STAR alignments. Not used in final manuscript.
large-scale dataset (D. yakuba female)	Dyak female abdomen replicate 3 gene-level read counts based on STAR alignments and FlyBase 2017_03 annotation	NCBI GEO; This paper	NCBI GEO GSE99574:GSM2647214_dyak_AC_f_r3.htseq_reverse.txt.gz	Based on alternative STAR alignments. Not used in final manuscript.
large-scale dataset (D. yakuba female)	Dyak female abdomen replicate 4 gene-level read counts based on STAR alignments and FlyBase 2017_03 annotation	NCBI GEO; This paper	NCBI GEO GSE99574:GSM2817297_dyak_AC_f_r4.htseq_reverse.txt.gz	Based on alternative STAR alignments. Not used in final manuscript.
large-scale dataset (D. yakuba female)	Dyak female viscera replicate 1 gene-level read counts based on STAR alignments and FlyBase 2017_03 annotation	NCBI GEO; This paper	NCBI GEO GSE99574:GSM2647218_dyak_DG_f_r1.htseq_reverse.txt.gz	Based on alternative STAR alignments. Not used in final manuscript.
large-scale dataset (D. yakuba female)	Dyak female viscera replicate 2 gene-level read counts based on STAR alignments and FlyBase 2017_03 annotation	NCBI GEO; This paper	NCBI GEO GSE99574:GSM2647219_dyak_DG_f_r2.htseq_reverse.txt.gz	Based on alternative STAR alignments. Not used in final manuscript.
large-scale dataset (D. yakuba female)	Dyak female viscera replicate 3 gene-level read counts based on STAR alignments and FlyBase 2017_03 annotation	NCBI GEO; This paper	NCBI GEO GSE99574:GSM2647220_dyak_DG_f_r3.htseq_reverse.txt.gz	Based on alternative STAR alignments. Not used in final manuscript.
large-scale dataset (D. yakuba female)	Dyak female viscera replicate 4 gene-level read counts based on STAR alignments and FlyBase 2017_03 annotation	NCBI GEO; This paper	NCBI GEO GSE99574:GSM2817299_dyak_DG_f_r4.htseq_reverse.txt.gz	Based on alternative STAR alignments. Not used in final manuscript.
large-scale dataset (D. yakuba female)	Dyak female gonad replicate 1 gene-level read counts based on STAR alignments and FlyBase 2017_03 annotation	NCBI GEO; This paper	NCBI GEO GSE99574:GSM2647224_dyak_GO_f_r1.htseq_reverse.txt.gz	Based on alternative STAR alignments. Not used in final manuscript.
large-scale dataset (D. yakuba female)	Dyak female gonad replicate 2 gene-level read counts based on STAR alignments and FlyBase 2017_03 annotation	NCBI GEO; This paper	NCBI GEO GSE99574:GSM2647225_dyak_GO_f_r2.htseq_reverse.txt.gz	Based on alternative STAR alignments. Not used in final manuscript.
large-scale dataset (D. yakuba female)	Dyak female gonad replicate 3 gene-level read counts based on STAR alignments and FlyBase 2017_03 annotation	NCBI GEO; This paper	NCBI GEO GSE99574:GSM2647226_dyak_GO_f_r3.htseq_reverse.txt.gz	Based on alternative STAR alignments. Not used in final manuscript.
large-scale dataset (D. yakuba female)	Dyak female gonad replicate 4 gene-level read counts based on STAR alignments and FlyBase 2017_03 annotation	NCBI GEO; This paper	NCBI GEO GSE99574:GSM2817301_dyak_GO_f_r4.htseq_reverse.txt.gz	Based on alternative STAR alignments. Not used in final manuscript.
large-scale dataset (D. yakuba female)	Dyak female head replicate 1 gene-level read counts based on STAR alignments and FlyBase 2017_03 annotation	NCBI GEO; This paper	NCBI GEO GSE99574:GSM2647230_dyak_HD_f_r1.htseq_reverse.txt.gz	Based on alternative STAR alignments. Not used in final manuscript.
large-scale dataset (D. yakuba female)	Dyak female head replicate 2 gene-level read counts based on STAR alignments and FlyBase 2017_03 annotation	NCBI GEO; This paper	NCBI GEO GSE99574:GSM2647231_dyak_HD_f_r2.htseq_reverse.txt.gz	Based on alternative STAR alignments. Not used in final manuscript.
large-scale dataset (D. yakuba female)	Dyak female head replicate 3 gene-level read counts based on STAR alignments and FlyBase 2017_03 annotation	NCBI GEO; This paper	NCBI GEO GSE99574:GSM2647232_dyak_HD_f_r3.htseq_reverse.txt.gz	Based on alternative STAR alignments. Not used in final manuscript.
large-scale dataset (D. yakuba female)	Dyak female head replicate 4 gene-level read counts based on STAR alignments and FlyBase 2017_03 annotation	NCBI GEO; This paper	NCBI GEO GSE99574:GSM2817303_dyak_HD_f_r4.htseq_reverse.txt.gz	Based on alternative STAR alignments. Not used in final manuscript.
large-scale dataset (D. yakuba female)	Dyak female reproductive tract replicate 1 gene-level read counts based on STAR alignments and FlyBase 2017_03 annotation	NCBI GEO; This paper	NCBI GEO GSE99574:GSM2647236_dyak_RE_f_r1.htseq_reverse.txt.gz	Based on alternative STAR alignments. Not used in final manuscript.
large-scale dataset (D. yakuba female)	Dyak female reproductive tract replicate 2 gene-level read counts based on STAR alignments and FlyBase 2017_03 annotation	NCBI GEO; This paper	NCBI GEO GSE99574:GSM2647237_dyak_RE_f_r2.htseq_reverse.txt.gz	Based on alternative STAR alignments. Not used in final manuscript.
large-scale dataset (D. yakuba female)	Dyak female reproductive tract replicate 3 gene-level read counts based on STAR alignments and FlyBase 2017_03 annotation	NCBI GEO; This paper	NCBI GEO GSE99574:GSM2647238_dyak_RE_f_r3.htseq_reverse.txt.gz	Based on alternative STAR alignments. Not used in final manuscript.
large-scale dataset (D. yakuba female)	Dyak female reproductive tract replicate 4 gene-level read counts based on STAR alignments and FlyBase 2017_03 annotation	NCBI GEO; This paper	NCBI GEO GSE99574:GSM2817305_dyak_RE_f_r4.htseq_reverse.txt.gz	Based on alternative STAR alignments. Not used in final manuscript.
large-scale dataset (D. yakuba female)	Dyak female thorax replicate 1 gene-level read counts based on STAR alignments and FlyBase 2017_03 annotation	NCBI GEO; This paper	NCBI GEO GSE99574:GSM2647242_dyak_TX_f_r1.htseq_reverse.txt.gz	Based on alternative STAR alignments. Not used in final manuscript.
large-scale dataset (D. yakuba female)	Dyak female thorax replicate 2 gene-level read counts based on STAR alignments and FlyBase 2017_03 annotation	NCBI GEO; This paper	NCBI GEO GSE99574:GSM2647243_dyak_TX_f_r2.htseq_reverse.txt.gz	Based on alternative STAR alignments. Not used in final manuscript.
large-scale dataset (D. yakuba female)	Dyak female thorax replicate 3 gene-level read counts based on STAR alignments and FlyBase 2017_03 annotation	NCBI GEO; This paper	NCBI GEO GSE99574:GSM2647244_dyak_TX_f_r3.htseq_reverse.txt.gz	Based on alternative STAR alignments. Not used in final manuscript.
large-scale dataset (D. yakuba female)	Dyak female thorax replicate 4 gene-level read counts based on STAR alignments and FlyBase 2017_03 annotation	NCBI GEO; This paper	NCBI GEO GSE99574:GSM2817307_dyak_TX_f_r4.htseq_reverse.txt.gz	Based on alternative STAR alignments. Not used in final manuscript.
large-scale dataset (D. yakuba female)	Dyak female whole organism replicate 1 gene-level read counts based on STAR alignments and FlyBase 2017_03 annotation	NCBI GEO; This paper	NCBI GEO GSE99574:GSM2647248_dyak_WB_f_r1.htseq_reverse.txt.gz	Based on alternative STAR alignments. Not used in final manuscript.
large-scale dataset (D. yakuba female)	Dyak female whole organism replicate 2 gene-level read counts based on STAR alignments and FlyBase 2017_03 annotation	NCBI GEO; This paper	NCBI GEO GSE99574:GSM2647249_dyak_WB_f_r2.htseq_reverse.txt.gz	Based on alternative STAR alignments. Not used in final manuscript.
large-scale dataset (D. yakuba female)	Dyak female whole organism replicate 3 gene-level read counts based on STAR alignments and FlyBase 2017_03 annotation	NCBI GEO; This paper	NCBI GEO GSE99574:GSM2647250_dyak_WB_f_r3.htseq_reverse.txt.gz	Based on alternative STAR alignments. Not used in final manuscript.
large-scale dataset (D. yakuba female)	Dyak female whole organism replicate 4 gene-level read counts based on STAR alignments and FlyBase 2017_03 annotation	NCBI GEO; This paper	NCBI GEO GSE99574:GSM2817309_dyak_WB_f_r4.htseq_reverse.txt.gz	Based on alternative STAR alignments. Not used in final manuscript.
large-scale dataset (D. yakuba male)	Dyak male abdomen replicate 1 gene-level read counts based on STAR alignments and FlyBase 2017_03 annotation	NCBI GEO; This paper	NCBI GEO GSE99574:GSM2647215_dyak_AC_m_r1.htseq_reverse.txt.gz	Based on alternative STAR alignments. Not used in final manuscript.
large-scale dataset (D. yakuba male)	Dyak male abdomen replicate 2 gene-level read counts based on STAR alignments and FlyBase 2017_03 annotation	NCBI GEO; This paper	NCBI GEO GSE99574:GSM2647216_dyak_AC_m_r2.htseq_reverse.txt.gz	Based on alternative STAR alignments. Not used in final manuscript.
large-scale dataset (D. yakuba male)	Dyak male abdomen replicate 3 gene-level read counts based on STAR alignments and FlyBase 2017_03 annotation	NCBI GEO; This paper	NCBI GEO GSE99574:GSM2647217_dyak_AC_m_r3.htseq_reverse.txt.gz	Based on alternative STAR alignments. Not used in final manuscript.
large-scale dataset (D. yakuba male)	Dyak male abdomen replicate 4 gene-level read counts based on STAR alignments and FlyBase 2017_03 annotation	NCBI GEO; This paper	NCBI GEO GSE99574:GSM2817298_dyak_AC_m_r4.htseq_reverse.txt.gz	Based on alternative STAR alignments. Not used in final manuscript.
large-scale dataset (D. yakuba male)	Dyak male viscera replicate 1 gene-level read counts based on STAR alignments and FlyBase 2017_03 annotation	NCBI GEO; This paper	NCBI GEO GSE99574:GSM2647221_dyak_DG_m_r1.htseq_reverse.txt.gz	Based on alternative STAR alignments. Not used in final manuscript.
large-scale dataset (D. yakuba male)	Dyak male viscera replicate 2 gene-level read counts based on STAR alignments and FlyBase 2017_03 annotation	NCBI GEO; This paper	NCBI GEO GSE99574:GSM2647222_dyak_DG_m_r2.htseq_reverse.txt.gz	Based on alternative STAR alignments. Not used in final manuscript.
large-scale dataset (D. yakuba male)	Dyak male viscera replicate 3 gene-level read counts based on STAR alignments and FlyBase 2017_03 annotation	NCBI GEO; This paper	NCBI GEO GSE99574:GSM2647223_dyak_DG_m_r3.htseq_reverse.txt.gz	Based on alternative STAR alignments. Not used in final manuscript.
large-scale dataset (D. yakuba male)	Dyak male viscera replicate 4 gene-level read counts based on STAR alignments and FlyBase 2017_03 annotation	NCBI GEO; This paper	NCBI GEO GSE99574:GSM2817300_dyak_DG_m_r4.htseq_reverse.txt.gz	Based on alternative STAR alignments. Not used in final manuscript.
large-scale dataset (D. yakuba male)	Dyak male gonad replicate 1 gene-level read counts based on STAR alignments and FlyBase 2017_03 annotation	NCBI GEO; This paper	NCBI GEO GSE99574:GSM2647227_dyak_GO_m_r1.htseq_reverse.txt.gz	Based on alternative STAR alignments. Not used in final manuscript.
large-scale dataset (D. yakuba male)	Dyak male gonad replicate 2 gene-level read counts based on STAR alignments and FlyBase 2017_03 annotation	NCBI GEO; This paper	NCBI GEO GSE99574:GSM2647228_dyak_GO_m_r2.htseq_reverse.txt.gz	Based on alternative STAR alignments. Not used in final manuscript.
large-scale dataset (D. yakuba male)	Dyak male gonad replicate 3 gene-level read counts based on STAR alignments and FlyBase 2017_03 annotation	NCBI GEO; This paper	NCBI GEO GSE99574:GSM2647229_dyak_GO_m_r3.htseq_reverse.txt.gz	Based on alternative STAR alignments. Not used in final manuscript.
large-scale dataset (D. yakuba male)	Dyak male gonad replicate 4 gene-level read counts based on STAR alignments and FlyBase 2017_03 annotation	NCBI GEO; This paper	NCBI GEO GSE99574:GSM2817302_dyak_GO_m_r4.htseq_reverse.txt.gz	Based on alternative STAR alignments. Not used in final manuscript.
large-scale dataset (D. yakuba male)	Dyak male head replicate 1 gene-level read counts based on STAR alignments and FlyBase 2017_03 annotation	NCBI GEO; This paper	NCBI GEO GSE99574:GSM2647233_dyak_HD_m_r1.htseq_reverse.txt.gz	Based on alternative STAR alignments. Not used in final manuscript.
large-scale dataset (D. yakuba male)	Dyak male head replicate 2 gene-level read counts based on STAR alignments and FlyBase 2017_03 annotation	NCBI GEO; This paper	NCBI GEO GSE99574:GSM2647234_dyak_HD_m_r2.htseq_reverse.txt.gz	Based on alternative STAR alignments. Not used in final manuscript.
large-scale dataset (D. yakuba male)	Dyak male head replicate 3 gene-level read counts based on STAR alignments and FlyBase 2017_03 annotation	NCBI GEO; This paper	NCBI GEO GSE99574:GSM2647235_dyak_HD_m_r3.htseq_reverse.txt.gz	Based on alternative STAR alignments. Not used in final manuscript.
large-scale dataset (D. yakuba male)	Dyak male head replicate 4 gene-level read counts based on STAR alignments and FlyBase 2017_03 annotation	NCBI GEO; This paper	NCBI GEO GSE99574:GSM2817304_dyak_HD_m_r4.htseq_reverse.txt.gz	Based on alternative STAR alignments. Not used in final manuscript.
large-scale dataset (D. yakuba male)	Dyak male reproductive tract replicate 1 gene-level read counts based on STAR alignments and FlyBase 2017_03 annotation	NCBI GEO; This paper	NCBI GEO GSE99574:GSM2647239_dyak_RE_m_r1.htseq_reverse.txt.gz	Based on alternative STAR alignments. Not used in final manuscript.
large-scale dataset (D. yakuba male)	Dyak male reproductive tract replicate 2 gene-level read counts based on STAR alignments and FlyBase 2017_03 annotation	NCBI GEO; This paper	NCBI GEO GSE99574:GSM2647240_dyak_RE_m_r2.htseq_reverse.txt.gz	Based on alternative STAR alignments. Not used in final manuscript.
large-scale dataset (D. yakuba male)	Dyak male reproductive tract replicate 3 gene-level read counts based on STAR alignments and FlyBase 2017_03 annotation	NCBI GEO; This paper	NCBI GEO GSE99574:GSM2647241_dyak_RE_m_r3.htseq_reverse.txt.gz	Based on alternative STAR alignments. Not used in final manuscript.
large-scale dataset (D. yakuba male)	Dyak male reproductive tract replicate 4 gene-level read counts based on STAR alignments and FlyBase 2017_03 annotation	NCBI GEO; This paper	NCBI GEO GSE99574:GSM2817306_dyak_RE_m_r4.htseq_reverse.txt.gz	Based on alternative STAR alignments. Not used in final manuscript.
large-scale dataset (D. yakuba male)	Dyak male thorax replicate 1 gene-level read counts based on STAR alignments and FlyBase 2017_03 annotation	NCBI GEO; This paper	NCBI GEO GSE99574:GSM2647245_dyak_TX_m_r1.htseq_reverse.txt.gz	Based on alternative STAR alignments. Not used in final manuscript.
large-scale dataset (D. yakuba male)	Dyak male thorax replicate 2 gene-level read counts based on STAR alignments and FlyBase 2017_03 annotation	NCBI GEO; This paper	NCBI GEO GSE99574:GSM2647246_dyak_TX_m_r2.htseq_reverse.txt.gz	Based on alternative STAR alignments. Not used in final manuscript.
large-scale dataset (D. yakuba male)	Dyak male thorax replicate 3 gene-level read counts based on STAR alignments and FlyBase 2017_03 annotation	NCBI GEO; This paper	NCBI GEO GSE99574:GSM2647247_dyak_TX_m_r3.htseq_reverse.txt.gz	Based on alternative STAR alignments. Not used in final manuscript.
large-scale dataset (D. yakuba male)	Dyak male thorax replicate 4 gene-level read counts based on STAR alignments and FlyBase 2017_03 annotation	NCBI GEO; This paper	NCBI GEO GSE99574:GSM2817308_dyak_TX_m_r4.htseq_reverse.txt.gz	Based on alternative STAR alignments. Not used in final manuscript.
large-scale dataset (D. yakuba male)	Dyak male whole organism replicate 1 gene-level read counts based on STAR alignments and FlyBase 2017_03 annotation	NCBI GEO; This paper	NCBI GEO GSE99574:GSM2647251_dyak_WB_m_r1.htseq_reverse.txt.gz	Based on alternative STAR alignments. Not used in final manuscript.
large-scale dataset (D. yakuba male)	Dyak male whole organism replicate 2 gene-level read counts based on STAR alignments and FlyBase 2017_03 annotation	NCBI GEO; This paper	NCBI GEO GSE99574:GSM2647252_dyak_WB_m_r2.htseq_reverse.txt.gz	Based on alternative STAR alignments. Not used in final manuscript.
large-scale dataset (D. yakuba male)	Dyak male whole organism replicate 3 gene-level read counts based on STAR alignments and FlyBase 2017_03 annotation	NCBI GEO; This paper	NCBI GEO GSE99574:GSM2647253_dyak_WB_m_r3.htseq_reverse.txt.gz	Based on alternative STAR alignments. Not used in final manuscript.
large-scale dataset (D. yakuba male)	Dyak male whole organism replicate 4 gene-level read counts based on STAR alignments and FlyBase 2017_03 annotation	NCBI GEO; This paper	NCBI GEO GSE99574:GSM2817310_dyak_WB_m_r4.htseq_reverse.txt.gz	Based on alternative STAR alignments. Not used in final manuscript.
large-scale dataset (D. melanogaster female)	oreR female abdomen replicate 1 gene-level read counts based on STAR alignments and FlyBase 2017_03 annotation	NCBI GEO; This paper	NCBI GEO GSE99574:GSM2647254_orgR_AC_f_r1.htseq_reverse.txt.gz	Based on alternative STAR alignments. Not used in final manuscript.
large-scale dataset (D. melanogaster female)	oreR female abdomen replicate 2 gene-level read counts based on STAR alignments and FlyBase 2017_03 annotation	NCBI GEO; This paper	NCBI GEO GSE99574:GSM2647255_orgR_AC_f_r2.htseq_reverse.txt.gz	Based on alternative STAR alignments. Not used in final manuscript.
large-scale dataset (D. melanogaster female)	oreR female abdomen replicate 3 gene-level read counts based on STAR alignments and FlyBase 2017_03 annotation	NCBI GEO; This paper	NCBI GEO GSE99574:GSM2647256_orgR_AC_f_r3.htseq_reverse.txt.gz	Based on alternative STAR alignments. Not used in final manuscript.
large-scale dataset (D. melanogaster female)	oreR female abdomen replicate 4 gene-level read counts based on STAR alignments and FlyBase 2017_03 annotation	NCBI GEO; This paper	NCBI GEO GSE99574:GSM2817311_orgR_AC_f_r4.htseq_reverse.txt.gz	Based on alternative STAR alignments. Not used in final manuscript.
large-scale dataset (D. melanogaster female)	oreR female viscera replicate 1 gene-level read counts based on STAR alignments and FlyBase 2017_03 annotation	NCBI GEO; This paper	NCBI GEO GSE99574:GSM2647260_orgR_DG_f_r1.htseq_reverse.txt.gz	Based on alternative STAR alignments. Not used in final manuscript.
large-scale dataset (D. melanogaster female)	oreR female viscera replicate 2 gene-level read counts based on STAR alignments and FlyBase 2017_03 annotation	NCBI GEO; This paper	NCBI GEO GSE99574:GSM2647261_orgR_DG_f_r2.htseq_reverse.txt.gz	Based on alternative STAR alignments. Not used in final manuscript.
large-scale dataset (D. melanogaster female)	oreR female viscera replicate 3 gene-level read counts based on STAR alignments and FlyBase 2017_03 annotation	NCBI GEO; This paper	NCBI GEO GSE99574:GSM2647262_orgR_DG_f_r3.htseq_reverse.txt.gz	Based on alternative STAR alignments. Not used in final manuscript.
large-scale dataset (D. melanogaster female)	oreR female viscera replicate 4 gene-level read counts based on STAR alignments and FlyBase 2017_03 annotation	NCBI GEO; This paper	NCBI GEO GSE99574:GSM2817313_orgR_DG_f_r4.htseq_reverse.txt.gz	Based on alternative STAR alignments. Not used in final manuscript.
large-scale dataset (D. melanogaster female)	oreR female terminalia replicate 1 gene-level read counts based on STAR alignments and FlyBase 2017_03 annotation	NCBI GEO; This paper	NCBI GEO GSE99574:GSM2647266_orgR_GE_f_r1.htseq_reverse.txt.gz	Based on alternative STAR alignments. Not used in final manuscript.
large-scale dataset (D. melanogaster female)	oreR female terminalia replicate 2 gene-level read counts based on STAR alignments and FlyBase 2017_03 annotation	NCBI GEO; This paper	NCBI GEO GSE99574:GSM2647267_orgR_GE_f_r2.htseq_reverse.txt.gz	Based on alternative STAR alignments. Not used in final manuscript.
large-scale dataset (D. melanogaster female)	oreR female terminalia replicate 3 gene-level read counts based on STAR alignments and FlyBase 2017_03 annotation	NCBI GEO; This paper	NCBI GEO GSE99574:GSM2647268_orgR_GE_f_r3.htseq_reverse.txt.gz	Based on alternative STAR alignments. Not used in final manuscript.
large-scale dataset (D. melanogaster female)	oreR female terminalia replicate 4 gene-level read counts based on STAR alignments and FlyBase 2017_03 annotation	NCBI GEO; This paper	NCBI GEO GSE99574:GSM2817315_orgR_GE_f_r4.htseq_reverse.txt.gz	Based on alternative STAR alignments. Not used in final manuscript.
large-scale dataset (D. melanogaster female)	oreR female gonad replicate 1 gene-level read counts based on STAR alignments and FlyBase 2017_03 annotation	NCBI GEO; This paper	NCBI GEO GSE99574:GSM2647272_orgR_GO_f_r1.htseq_reverse.txt.gz	Based on alternative STAR alignments. Not used in final manuscript.
large-scale dataset (D. melanogaster female)	oreR female gonad replicate 2 gene-level read counts based on STAR alignments and FlyBase 2017_03 annotation	NCBI GEO; This paper	NCBI GEO GSE99574:GSM2647273_orgR_GO_f_r2.htseq_reverse.txt.gz	Based on alternative STAR alignments. Not used in final manuscript.
large-scale dataset (D. melanogaster female)	oreR female gonad replicate 3 gene-level read counts based on STAR alignments and FlyBase 2017_03 annotation	NCBI GEO; This paper	NCBI GEO GSE99574:GSM2647274_orgR_GO_f_r3.htseq_reverse.txt.gz	Based on alternative STAR alignments. Not used in final manuscript.
large-scale dataset (D. melanogaster female)	oreR female gonad replicate 4 gene-level read counts based on STAR alignments and FlyBase 2017_03 annotation	NCBI GEO; This paper	NCBI GEO GSE99574:GSM2817317_orgR_GO_f_r4.htseq_reverse.txt.gz	Based on alternative STAR alignments. Not used in final manuscript.
large-scale dataset (D. melanogaster female)	oreR female head replicate 1 gene-level read counts based on STAR alignments and FlyBase 2017_03 annotation	NCBI GEO; This paper	NCBI GEO GSE99574:GSM2647278_orgR_HD_f_r1.htseq_reverse.txt.gz	Based on alternative STAR alignments. Not used in final manuscript.
large-scale dataset (D. melanogaster female)	oreR female head replicate 2 gene-level read counts based on STAR alignments and FlyBase 2017_03 annotation	NCBI GEO; This paper	NCBI GEO GSE99574:GSM2647279_orgR_HD_f_r2.htseq_reverse.txt.gz	Based on alternative STAR alignments. Not used in final manuscript.
large-scale dataset (D. melanogaster female)	oreR female head replicate 3 gene-level read counts based on STAR alignments and FlyBase 2017_03 annotation	NCBI GEO; This paper	NCBI GEO GSE99574:GSM2647280_orgR_HD_f_r3.htseq_reverse.txt.gz	Based on alternative STAR alignments. Not used in final manuscript.
large-scale dataset (D. melanogaster female)	oreR female head replicate 4 gene-level read counts based on STAR alignments and FlyBase 2017_03 annotation	NCBI GEO; This paper	NCBI GEO GSE99574:GSM2817319_orgR_HD_f_r4.htseq_reverse.txt.gz	Based on alternative STAR alignments. Not used in final manuscript.
large-scale dataset (D. melanogaster female)	oreR female internal reproductive tract replicate 1 gene-level read counts based on STAR alignments and FlyBase 2017_03 annotation	NCBI GEO; This paper	NCBI GEO GSE99574:GSM2647284_orgR_RE_f_r1.htseq_reverse.txt.gz	Based on alternative STAR alignments. Not used in final manuscript.
large-scale dataset (D. melanogaster female)	oreR female internal reproductive tract replicate 2 gene-level read counts based on STAR alignments and FlyBase 2017_03 annotation	NCBI GEO; This paper	NCBI GEO GSE99574:GSM2647285_orgR_RE_f_r2.htseq_reverse.txt.gz	Based on alternative STAR alignments. Not used in final manuscript.
large-scale dataset (D. melanogaster female)	oreR female internal reproductive tract replicate 3 gene-level read counts based on STAR alignments and FlyBase 2017_03 annotation	NCBI GEO; This paper	NCBI GEO GSE99574:GSM2647286_orgR_RE_f_r3.htseq_reverse.txt.gz	Based on alternative STAR alignments. Not used in final manuscript.
large-scale dataset (D. melanogaster female)	oreR female internal reproductive tract replicate 4 gene-level read counts based on STAR alignments and FlyBase 2017_03 annotation	NCBI GEO; This paper	NCBI GEO GSE99574:GSM2817321_orgR_RE_f_r4.htseq_reverse.txt.gz	Based on alternative STAR alignments. Not used in final manuscript.
large-scale dataset (D. melanogaster female)	oreR female thorax replicate 1 gene-level read counts based on STAR alignments and FlyBase 2017_03 annotation	NCBI GEO; This paper	NCBI GEO GSE99574:GSM2647290_orgR_TX_f_r1.htseq_reverse.txt.gz	Based on alternative STAR alignments. Not used in final manuscript.
large-scale dataset (D. melanogaster female)	oreR female thorax replicate 2 gene-level read counts based on STAR alignments and FlyBase 2017_03 annotation	NCBI GEO; This paper	NCBI GEO GSE99574:GSM2647291_orgR_TX_f_r2.htseq_reverse.txt.gz	Based on alternative STAR alignments. Not used in final manuscript.
large-scale dataset (D. melanogaster female)	oreR female thorax replicate 3 gene-level read counts based on STAR alignments and FlyBase 2017_03 annotation	NCBI GEO; This paper	NCBI GEO GSE99574:GSM2647292_orgR_TX_f_r3.htseq_reverse.txt.gz	Based on alternative STAR alignments. Not used in final manuscript.
large-scale dataset (D. melanogaster female)	oreR female thorax replicate 4 gene-level read counts based on STAR alignments and FlyBase 2017_03 annotation	NCBI GEO; This paper	NCBI GEO GSE99574:GSM2817323_orgR_TX_f_r4.htseq_reverse.txt.gz	Based on alternative STAR alignments. Not used in final manuscript.
large-scale dataset (D. melanogaster female)	oreR female whole organism replicate 1 gene-level read counts based on STAR alignments and FlyBase 2017_03 annotation	NCBI GEO; This paper	NCBI GEO GSE99574:GSM2647296_orgR_WB_f_r1.htseq_reverse.txt.gz	Based on alternative STAR alignments. Not used in final manuscript.
large-scale dataset (D. melanogaster female)	oreR female whole organism replicate 2 gene-level read counts based on STAR alignments and FlyBase 2017_03 annotation	NCBI GEO; This paper	NCBI GEO GSE99574:GSM2647297_orgR_WB_f_r2.htseq_reverse.txt.gz	Based on alternative STAR alignments. Not used in final manuscript.
large-scale dataset (D. melanogaster female)	oreR female whole organism replicate 3 gene-level read counts based on STAR alignments and FlyBase 2017_03 annotation	NCBI GEO; This paper	NCBI GEO GSE99574:GSM2647298_orgR_WB_f_r3.htseq_reverse.txt.gz	Based on alternative STAR alignments. Not used in final manuscript.
large-scale dataset (D. melanogaster female)	oreR female whole organism replicate 4 gene-level read counts based on STAR alignments and FlyBase 2017_03 annotation	NCBI GEO; This paper	NCBI GEO GSE99574:GSM2817325_orgR_WB_f_r4.htseq_reverse.txt.gz	Based on alternative STAR alignments. Not used in final manuscript.
large-scale dataset (D. melanogaster male)	oreR male abdomen replicate 1 gene-level read counts based on STAR alignments and FlyBase 2017_03 annotation	NCBI GEO; This paper	NCBI GEO GSE99574:GSM2647257_orgR_AC_m_r1.htseq_reverse.txt.gz	Based on alternative STAR alignments. Not used in final manuscript.
large-scale dataset (D. melanogaster male)	oreR male abdomen replicate 2 gene-level read counts based on STAR alignments and FlyBase 2017_03 annotation	NCBI GEO; This paper	NCBI GEO GSE99574:GSM2647258_orgR_AC_m_r2.htseq_reverse.txt.gz	Based on alternative STAR alignments. Not used in final manuscript.
large-scale dataset (D. melanogaster male)	oreR male abdomen replicate 3 gene-level read counts based on STAR alignments and FlyBase 2017_03 annotation	NCBI GEO; This paper	NCBI GEO GSE99574:GSM2647259_orgR_AC_m_r3.htseq_reverse.txt.gz	Based on alternative STAR alignments. Not used in final manuscript.
large-scale dataset (D. melanogaster male)	oreR male abdomen replicate 4 gene-level read counts based on STAR alignments and FlyBase 2017_03 annotation	NCBI GEO; This paper	NCBI GEO GSE99574:GSM2817312_orgR_AC_m_r4.htseq_reverse.txt.gz	Based on alternative STAR alignments. Not used in final manuscript.
large-scale dataset (D. melanogaster male)	oreR male viscera replicate 1 gene-level read counts based on STAR alignments and FlyBase 2017_03 annotation	NCBI GEO; This paper	NCBI GEO GSE99574:GSM2647263_orgR_DG_m_r1.htseq_reverse.txt.gz	Based on alternative STAR alignments. Not used in final manuscript.
large-scale dataset (D. melanogaster male)	oreR male viscera replicate 2 gene-level read counts based on STAR alignments and FlyBase 2017_03 annotation	NCBI GEO; This paper	NCBI GEO GSE99574:GSM2647264_orgR_DG_m_r2.htseq_reverse.txt.gz	Based on alternative STAR alignments. Not used in final manuscript.
large-scale dataset (D. melanogaster male)	oreR male viscera replicate 3 gene-level read counts based on STAR alignments and FlyBase 2017_03 annotation	NCBI GEO; This paper	NCBI GEO GSE99574:GSM2647265_orgR_DG_m_r3.htseq_reverse.txt.gz	Based on alternative STAR alignments. Not used in final manuscript.
large-scale dataset (D. melanogaster male)	oreR male viscera replicate 4 gene-level read counts based on STAR alignments and FlyBase 2017_03 annotation	NCBI GEO; This paper	NCBI GEO GSE99574:GSM2817314_orgR_DG_m_r4.htseq_reverse.txt.gz	Based on alternative STAR alignments. Not used in final manuscript.
large-scale dataset (D. melanogaster male)	oreR male terminalia replicate 1 gene-level read counts based on STAR alignments and FlyBase 2017_03 annotation	NCBI GEO; This paper	NCBI GEO GSE99574:GSM2647269_orgR_GE_m_r1.htseq_reverse.txt.gz	Based on alternative STAR alignments. Not used in final manuscript.
large-scale dataset (D. melanogaster male)	oreR male terminalia replicate 2 gene-level read counts based on STAR alignments and FlyBase 2017_03 annotation	NCBI GEO; This paper	NCBI GEO GSE99574:GSM2647270_orgR_GE_m_r2.htseq_reverse.txt.gz	Based on alternative STAR alignments. Not used in final manuscript.
large-scale dataset (D. melanogaster male)	oreR male terminalia replicate 3 gene-level read counts based on STAR alignments and FlyBase 2017_03 annotation	NCBI GEO; This paper	NCBI GEO GSE99574:GSM2647271_orgR_GE_m_r3.htseq_reverse.txt.gz	Based on alternative STAR alignments. Not used in final manuscript.
large-scale dataset (D. melanogaster male)	oreR male terminalia replicate 4 gene-level read counts based on STAR alignments and FlyBase 2017_03 annotation	NCBI GEO; This paper	NCBI GEO GSE99574:GSM2817316_orgR_GE_m_r4.htseq_reverse.txt.gz	Based on alternative STAR alignments. Not used in final manuscript.
large-scale dataset (D. melanogaster male)	oreR male gonad replicate 1 gene-level read counts based on STAR alignments and FlyBase 2017_03 annotation	NCBI GEO; This paper	NCBI GEO GSE99574:GSM2647275_orgR_GO_m_r1.htseq_reverse.txt.gz	Based on alternative STAR alignments. Not used in final manuscript.
large-scale dataset (D. melanogaster male)	oreR male gonad replicate 2 gene-level read counts based on STAR alignments and FlyBase 2017_03 annotation	NCBI GEO; This paper	NCBI GEO GSE99574:GSM2647276_orgR_GO_m_r2.htseq_reverse.txt.gz	Based on alternative STAR alignments. Not used in final manuscript.
large-scale dataset (D. melanogaster male)	oreR male gonad replicate 3 gene-level read counts based on STAR alignments and FlyBase 2017_03 annotation	NCBI GEO; This paper	NCBI GEO GSE99574:GSM2647277_orgR_GO_m_r3.htseq_reverse.txt.gz	Based on alternative STAR alignments. Not used in final manuscript.
large-scale dataset (D. melanogaster male)	oreR male gonad replicate 4 gene-level read counts based on STAR alignments and FlyBase 2017_03 annotation	NCBI GEO; This paper	NCBI GEO GSE99574:GSM2817318_orgR_GO_m_r4.htseq_reverse.txt.gz	Based on alternative STAR alignments. Not used in final manuscript.
large-scale dataset (D. melanogaster male)	oreR male head replicate 1 gene-level read counts based on STAR alignments and FlyBase 2017_03 annotation	NCBI GEO; This paper	NCBI GEO GSE99574:GSM2647281_orgR_HD_m_r1.htseq_reverse.txt.gz	Based on alternative STAR alignments. Not used in final manuscript.
large-scale dataset (D. melanogaster male)	oreR male head replicate 2 gene-level read counts based on STAR alignments and FlyBase 2017_03 annotation	NCBI GEO; This paper	NCBI GEO GSE99574:GSM2647282_orgR_HD_m_r2.htseq_reverse.txt.gz	Based on alternative STAR alignments. Not used in final manuscript.
large-scale dataset (D. melanogaster male)	oreR male head replicate 3 gene-level read counts based on STAR alignments and FlyBase 2017_03 annotation	NCBI GEO; This paper	NCBI GEO GSE99574:GSM2647283_orgR_HD_m_r3.htseq_reverse.txt.gz	Based on alternative STAR alignments. Not used in final manuscript.
large-scale dataset (D. melanogaster male)	oreR male head replicate 4 gene-level read counts based on STAR alignments and FlyBase 2017_03 annotation	NCBI GEO; This paper	NCBI GEO GSE99574:GSM2817320_orgR_HD_m_r4.htseq_reverse.txt.gz	Based on alternative STAR alignments. Not used in final manuscript.
large-scale dataset (D. melanogaster male)	oreR male internal reproductive tract replicate 1 gene-level read counts based on STAR alignments and FlyBase 2017_03 annotation	NCBI GEO; This paper	NCBI GEO GSE99574:GSM2647287_orgR_RE_m_r1.htseq_reverse.txt.gz	Based on alternative STAR alignments. Not used in final manuscript.
large-scale dataset (D. melanogaster male)	oreR male internal reproductive tract replicate 2 gene-level read counts based on STAR alignments and FlyBase 2017_03 annotation	NCBI GEO; This paper	NCBI GEO GSE99574:GSM2647288_orgR_RE_m_r2.htseq_reverse.txt.gz	Based on alternative STAR alignments. Not used in final manuscript.
large-scale dataset (D. melanogaster male)	oreR male internal reproductive tract replicate 3 gene-level read counts based on STAR alignments and FlyBase 2017_03 annotation	NCBI GEO; This paper	NCBI GEO GSE99574:GSM2647289_orgR_RE_m_r3.htseq_reverse.txt.gz	Based on alternative STAR alignments. Not used in final manuscript.
large-scale dataset (D. melanogaster male)	oreR male internal reproductive tract replicate 4 gene-level read counts based on STAR alignments and FlyBase 2017_03 annotation	NCBI GEO; This paper	NCBI GEO GSE99574:GSM2817322_orgR_RE_m_r4.htseq_reverse.txt.gz	Based on alternative STAR alignments. Not used in final manuscript.
large-scale dataset (D. melanogaster male)	oreR male thorax replicate 1 gene-level read counts based on STAR alignments and FlyBase 2017_03 annotation	NCBI GEO; This paper	NCBI GEO GSE99574:GSM2647293_orgR_TX_m_r1.htseq_reverse.txt.gz	Based on alternative STAR alignments. Not used in final manuscript.
large-scale dataset (D. melanogaster male)	oreR male thorax replicate 2 gene-level read counts based on STAR alignments and FlyBase 2017_03 annotation	NCBI GEO; This paper	NCBI GEO GSE99574:GSM2647294_orgR_TX_m_r2.htseq_reverse.txt.gz	Based on alternative STAR alignments. Not used in final manuscript.
large-scale dataset (D. melanogaster male)	oreR male thorax replicate 3 gene-level read counts based on STAR alignments and FlyBase 2017_03 annotation	NCBI GEO; This paper	NCBI GEO GSE99574:GSM2647295_orgR_TX_m_r3.htseq_reverse.txt.gz	Based on alternative STAR alignments. Not used in final manuscript.
large-scale dataset (D. melanogaster male)	oreR male thorax replicate 4 gene-level read counts based on STAR alignments and FlyBase 2017_03 annotation	NCBI GEO; This paper	NCBI GEO GSE99574:GSM2817324_orgR_TX_m_r4.htseq_reverse.txt.gz	Based on alternative STAR alignments. Not used in final manuscript.
large-scale dataset (D. melanogaster male)	oreR male whole organism replicate 1 gene-level read counts based on STAR alignments and FlyBase 2017_03 annotation	NCBI GEO; This paper	NCBI GEO GSE99574:GSM2647299_orgR_WB_m_r1.htseq_reverse.txt.gz	Based on alternative STAR alignments. Not used in final manuscript.
large-scale dataset (D. melanogaster male)	oreR male whole organism replicate 2 gene-level read counts based on STAR alignments and FlyBase 2017_03 annotation	NCBI GEO; This paper	NCBI GEO GSE99574:GSM2647300_orgR_WB_m_r2.htseq_reverse.txt.gz	Based on alternative STAR alignments. Not used in final manuscript.
large-scale dataset (D. melanogaster male)	oreR male whole organism replicate 3 gene-level read counts based on STAR alignments and FlyBase 2017_03 annotation	NCBI GEO; This paper	NCBI GEO GSE99574:GSM2647301_orgR_WB_m_r3.htseq_reverse.txt.gz	Based on alternative STAR alignments. Not used in final manuscript.
large-scale dataset (D. melanogaster male)	oreR male whole organism replicate 4 gene-level read counts based on STAR alignments and FlyBase 2017_03 annotation	NCBI GEO; This paper	NCBI GEO GSE99574:GSM2817326_orgR_WB_m_r4.htseq_reverse.txt.gz	Based on alternative STAR alignments. Not used in final manuscript.
large-scale dataset (D. melanogaster female)	w1118 female abdomen replicate 1 gene-level read counts based on STAR alignments and FlyBase 2017_03 annotation	NCBI GEO; This paper	NCBI GEO GSE99574:GSM2647302_w1118_AC_f_r1.htseq_reverse.txt.gz	Based on alternative STAR alignments. Not used in final manuscript.
large-scale dataset (D. melanogaster female)	w1118 female abdomen replicate 2 gene-level read counts based on STAR alignments and FlyBase 2017_03 annotation	NCBI GEO; This paper	NCBI GEO GSE99574:GSM2647303_w1118_AC_f_r2.htseq_reverse.txt.gz	Based on alternative STAR alignments. Not used in final manuscript.
large-scale dataset (D. melanogaster female)	w1118 female abdomen replicate 3 gene-level read counts based on STAR alignments and FlyBase 2017_03 annotation	NCBI GEO; This paper	NCBI GEO GSE99574:GSM2647304_w1118_AC_f_r3.htseq_reverse.txt.gz	Based on alternative STAR alignments. Not used in final manuscript.
large-scale dataset (D. melanogaster female)	w1118 female abdomen replicate 4 gene-level read counts based on STAR alignments and FlyBase 2017_03 annotation	NCBI GEO; This paper	NCBI GEO GSE99574:GSM2817327_w1118_AC_f_r4.htseq_reverse.txt.gz	Based on alternative STAR alignments. Not used in final manuscript.
large-scale dataset (D. melanogaster female)	w1118 female viscera replicate 1 gene-level read counts based on STAR alignments and FlyBase 2017_03 annotation	NCBI GEO; This paper	NCBI GEO GSE99574:GSM2647308_w1118_DG_f_r1.htseq_reverse.txt.gz	Based on alternative STAR alignments. Not used in final manuscript.
large-scale dataset (D. melanogaster female)	w1118 female viscera replicate 2 gene-level read counts based on STAR alignments and FlyBase 2017_03 annotation	NCBI GEO; This paper	NCBI GEO GSE99574:GSM2647309_w1118_DG_f_r2.htseq_reverse.txt.gz	Based on alternative STAR alignments. Not used in final manuscript.
large-scale dataset (D. melanogaster female)	w1118 female viscera replicate 3 gene-level read counts based on STAR alignments and FlyBase 2017_03 annotation	NCBI GEO; This paper	NCBI GEO GSE99574:GSM2647310_w1118_DG_f_r3.htseq_reverse.txt.gz	Based on alternative STAR alignments. Not used in final manuscript.
large-scale dataset (D. melanogaster female)	w1118 female viscera replicate 4 gene-level read counts based on STAR alignments and FlyBase 2017_03 annotation	NCBI GEO; This paper	NCBI GEO GSE99574:GSM2817329_w1118_DG_f_r4.htseq_reverse.txt.gz	Based on alternative STAR alignments. Not used in final manuscript.
large-scale dataset (D. melanogaster female)	w1118 female terminalia replicate 1 gene-level read counts based on STAR alignments and FlyBase 2017_03 annotation	NCBI GEO; This paper	NCBI GEO GSE99574:GSM2647314_w1118_GE_f_r1.htseq_reverse.txt.gz	Based on alternative STAR alignments. Not used in final manuscript.
large-scale dataset (D. melanogaster female)	w1118 female terminalia replicate 2 gene-level read counts based on STAR alignments and FlyBase 2017_03 annotation	NCBI GEO; This paper	NCBI GEO GSE99574:GSM2647315_w1118_GE_f_r2.htseq_reverse.txt.gz	Based on alternative STAR alignments. Not used in final manuscript.
large-scale dataset (D. melanogaster female)	w1118 female terminalia replicate 3 gene-level read counts based on STAR alignments and FlyBase 2017_03 annotation	NCBI GEO; This paper	NCBI GEO GSE99574:GSM2647316_w1118_GE_f_r3.htseq_reverse.txt.gz	Based on alternative STAR alignments. Not used in final manuscript.
large-scale dataset (D. melanogaster female)	w1118 female terminalia replicate 4 gene-level read counts based on STAR alignments and FlyBase 2017_03 annotation	NCBI GEO; This paper	NCBI GEO GSE99574:GSM2817331_w1118_GE_f_r4.htseq_reverse.txt.gz	Based on alternative STAR alignments. Not used in final manuscript.
large-scale dataset (D. melanogaster female)	w1118 female gonad replicate 1 gene-level read counts based on STAR alignments and FlyBase 2017_03 annotation	NCBI GEO; This paper	NCBI GEO GSE99574:GSM2647320_w1118_GO_f_r1.htseq_reverse.txt.gz	Based on alternative STAR alignments. Not used in final manuscript.
large-scale dataset (D. melanogaster female)	w1118 female gonad replicate 2 gene-level read counts based on STAR alignments and FlyBase 2017_03 annotation	NCBI GEO; This paper	NCBI GEO GSE99574:GSM2647321_w1118_GO_f_r2.htseq_reverse.txt.gz	Based on alternative STAR alignments. Not used in final manuscript.
large-scale dataset (D. melanogaster female)	w1118 female gonad replicate 3 gene-level read counts based on STAR alignments and FlyBase 2017_03 annotation	NCBI GEO; This paper	NCBI GEO GSE99574:GSM2647322_w1118_GO_f_r3.htseq_reverse.txt.gz	Based on alternative STAR alignments. Not used in final manuscript.
large-scale dataset (D. melanogaster female)	w1118 female gonad replicate 4 gene-level read counts based on STAR alignments and FlyBase 2017_03 annotation	NCBI GEO; This paper	NCBI GEO GSE99574:GSM2817333_w1118_GO_f_r4.htseq_reverse.txt.gz	Based on alternative STAR alignments. Not used in final manuscript.
large-scale dataset (D. melanogaster female)	w1118 female head replicate 1 gene-level read counts based on STAR alignments and FlyBase 2017_03 annotation	NCBI GEO; This paper	NCBI GEO GSE99574:GSM2647326_w1118_HD_f_r1.htseq_reverse.txt.gz	Based on alternative STAR alignments. Not used in final manuscript.
large-scale dataset (D. melanogaster female)	w1118 female head replicate 2 gene-level read counts based on STAR alignments and FlyBase 2017_03 annotation	NCBI GEO; This paper	NCBI GEO GSE99574:GSM2647327_w1118_HD_f_r2.htseq_reverse.txt.gz	Based on alternative STAR alignments. Not used in final manuscript.
large-scale dataset (D. melanogaster female)	w1118 female head replicate 3 gene-level read counts based on STAR alignments and FlyBase 2017_03 annotation	NCBI GEO; This paper	NCBI GEO GSE99574:GSM2647328_w1118_HD_f_r3.htseq_reverse.txt.gz	Based on alternative STAR alignments. Not used in final manuscript.
large-scale dataset (D. melanogaster female)	w1118 female head replicate 4 gene-level read counts based on STAR alignments and FlyBase 2017_03 annotation	NCBI GEO; This paper	NCBI GEO GSE99574:GSM2817335_w1118_HD_f_r4.htseq_reverse.txt.gz	Based on alternative STAR alignments. Not used in final manuscript.
large-scale dataset (D. melanogaster female)	w1118 female internal reproductive tract replicate 1 gene-level read counts based on STAR alignments and FlyBase 2017_03 annotation	NCBI GEO; This paper	NCBI GEO GSE99574:GSM2647332_w1118_RE_f_r1.htseq_reverse.txt.gz	Based on alternative STAR alignments. Not used in final manuscript.
large-scale dataset (D. melanogaster female)	w1118 female internal reproductive tract replicate 2 gene-level read counts based on STAR alignments and FlyBase 2017_03 annotation	NCBI GEO; This paper	NCBI GEO GSE99574:GSM2647333_w1118_RE_f_r2.htseq_reverse.txt.gz	Based on alternative STAR alignments. Not used in final manuscript.
large-scale dataset (D. melanogaster female)	w1118 female internal reproductive tract replicate 3 gene-level read counts based on STAR alignments and FlyBase 2017_03 annotation	NCBI GEO; This paper	NCBI GEO GSE99574:GSM2647334_w1118_RE_f_r3.htseq_reverse.txt.gz	Based on alternative STAR alignments. Not used in final manuscript.
large-scale dataset (D. melanogaster female)	w1118 female internal reproductive tract replicate 4 gene-level read counts based on STAR alignments and FlyBase 2017_03 annotation	NCBI GEO; This paper	NCBI GEO GSE99574:GSM2817337_w1118_RE_f_r4.htseq_reverse.txt.gz	Based on alternative STAR alignments. Not used in final manuscript.
large-scale dataset (D. melanogaster female)	w1118 female thorax replicate 1 gene-level read counts based on STAR alignments and FlyBase 2017_03 annotation	NCBI GEO; This paper	NCBI GEO GSE99574:GSM2647338_w1118_TX_f_r1.htseq_reverse.txt.gz	Based on alternative STAR alignments. Not used in final manuscript.
large-scale dataset (D. melanogaster female)	w1118 female thorax replicate 2 gene-level read counts based on STAR alignments and FlyBase 2017_03 annotation	NCBI GEO; This paper	NCBI GEO GSE99574:GSM2647339_w1118_TX_f_r2.htseq_reverse.txt.gz	Based on alternative STAR alignments. Not used in final manuscript.
large-scale dataset (D. melanogaster female)	w1118 female thorax replicate 3 gene-level read counts based on STAR alignments and FlyBase 2017_03 annotation	NCBI GEO; This paper	NCBI GEO GSE99574:GSM2647340_w1118_TX_f_r3.htseq_reverse.txt.gz	Based on alternative STAR alignments. Not used in final manuscript.
large-scale dataset (D. melanogaster female)	w1118 female thorax replicate 4 gene-level read counts based on STAR alignments and FlyBase 2017_03 annotation	NCBI GEO; This paper	NCBI GEO GSE99574:GSM2817339_w1118_TX_f_r4.htseq_reverse.txt.gz	Based on alternative STAR alignments. Not used in final manuscript.
large-scale dataset (D. melanogaster female)	w1118 female whole organism replicate 1 gene-level read counts based on STAR alignments and FlyBase 2017_03 annotation	NCBI GEO; This paper	NCBI GEO GSE99574:GSM2647344_w1118_WB_f_r1.htseq_reverse.txt.gz	Based on alternative STAR alignments. Not used in final manuscript.
large-scale dataset (D. melanogaster female)	w1118 female whole organism replicate 2 gene-level read counts based on STAR alignments and FlyBase 2017_03 annotation	NCBI GEO; This paper	NCBI GEO GSE99574:GSM2647345_w1118_WB_f_r2.htseq_reverse.txt.gz	Based on alternative STAR alignments. Not used in final manuscript.
large-scale dataset (D. melanogaster female)	w1118 female whole organism replicate 3 gene-level read counts based on STAR alignments and FlyBase 2017_03 annotation	NCBI GEO; This paper	NCBI GEO GSE99574:GSM2647346_w1118_WB_f_r3.htseq_reverse.txt.gz	Based on alternative STAR alignments. Not used in final manuscript.
large-scale dataset (D. melanogaster female)	w1118 female whole organism replicate 4 gene-level read counts based on STAR alignments and FlyBase 2017_03 annotation	NCBI GEO; This paper	NCBI GEO GSE99574:GSM2817341_w1118_WB_f_r4.htseq_reverse.txt.gz	Based on alternative STAR alignments. Not used in final manuscript.
large-scale dataset (D. melanogaster male)	w1118 male abdomen replicate 1 gene-level read counts based on STAR alignments and FlyBase 2017_03 annotation	NCBI GEO; This paper	NCBI GEO GSE99574:GSM2647305_w1118_AC_m_r1.htseq_reverse.txt.gz	Based on alternative STAR alignments. Not used in final manuscript.
large-scale dataset (D. melanogaster male)	w1118 male abdomen replicate 2 gene-level read counts based on STAR alignments and FlyBase 2017_03 annotation	NCBI GEO; This paper	NCBI GEO GSE99574:GSM2647306_w1118_AC_m_r2.htseq_reverse.txt.gz	Based on alternative STAR alignments. Not used in final manuscript.
large-scale dataset (D. melanogaster male)	w1118 male abdomen replicate 3 gene-level read counts based on STAR alignments and FlyBase 2017_03 annotation	NCBI GEO; This paper	NCBI GEO GSE99574:GSM2647307_w1118_AC_m_r3.htseq_reverse.txt.gz	Based on alternative STAR alignments. Not used in final manuscript.
large-scale dataset (D. melanogaster male)	w1118 male abdomen replicate 4 gene-level read counts based on STAR alignments and FlyBase 2017_03 annotation	NCBI GEO; This paper	NCBI GEO GSE99574:GSM2817328_w1118_AC_m_r4.htseq_reverse.txt.gz	Based on alternative STAR alignments. Not used in final manuscript.
large-scale dataset (D. melanogaster male)	w1118 male viscera replicate 1 gene-level read counts based on STAR alignments and FlyBase 2017_03 annotation	NCBI GEO; This paper	NCBI GEO GSE99574:GSM2647311_w1118_DG_m_r1.htseq_reverse.txt.gz	Based on alternative STAR alignments. Not used in final manuscript.
large-scale dataset (D. melanogaster male)	w1118 male viscera replicate 2 gene-level read counts based on STAR alignments and FlyBase 2017_03 annotation	NCBI GEO; This paper	NCBI GEO GSE99574:GSM2647312_w1118_DG_m_r2.htseq_reverse.txt.gz	Based on alternative STAR alignments. Not used in final manuscript.
large-scale dataset (D. melanogaster male)	w1118 male viscera replicate 3 gene-level read counts based on STAR alignments and FlyBase 2017_03 annotation	NCBI GEO; This paper	NCBI GEO GSE99574:GSM2647313_w1118_DG_m_r3.htseq_reverse.txt.gz	Based on alternative STAR alignments. Not used in final manuscript.
large-scale dataset (D. melanogaster male)	w1118 male viscera replicate 4 gene-level read counts based on STAR alignments and FlyBase 2017_03 annotation	NCBI GEO; This paper	NCBI GEO GSE99574:GSM2817330_w1118_DG_m_r4.htseq_reverse.txt.gz	Based on alternative STAR alignments. Not used in final manuscript.
large-scale dataset (D. melanogaster male)	w1118 male terminalia replicate 1 gene-level read counts based on STAR alignments and FlyBase 2017_03 annotation	NCBI GEO; This paper	NCBI GEO GSE99574:GSM2647317_w1118_GE_m_r1.htseq_reverse.txt.gz	Based on alternative STAR alignments. Not used in final manuscript.
large-scale dataset (D. melanogaster male)	w1118 male terminalia replicate 2 gene-level read counts based on STAR alignments and FlyBase 2017_03 annotation	NCBI GEO; This paper	NCBI GEO GSE99574:GSM2647318_w1118_GE_m_r2.htseq_reverse.txt.gz	Based on alternative STAR alignments. Not used in final manuscript.
large-scale dataset (D. melanogaster male)	w1118 male terminalia replicate 3 gene-level read counts based on STAR alignments and FlyBase 2017_03 annotation	NCBI GEO; This paper	NCBI GEO GSE99574:GSM2647319_w1118_GE_m_r3.htseq_reverse.txt.gz	Based on alternative STAR alignments. Not used in final manuscript.
large-scale dataset (D. melanogaster male)	w1118 male terminalia replicate 4 gene-level read counts based on STAR alignments and FlyBase 2017_03 annotation	NCBI GEO; This paper	NCBI GEO GSE99574:GSM2817332_w1118_GE_m_r4.htseq_reverse.txt.gz	Based on alternative STAR alignments. Not used in final manuscript.
large-scale dataset (D. melanogaster male)	w1118 male gonad replicate 1 gene-level read counts based on STAR alignments and FlyBase 2017_03 annotation	NCBI GEO; This paper	NCBI GEO GSE99574:GSM2647323_w1118_GO_m_r1.htseq_reverse.txt.gz	Based on alternative STAR alignments. Not used in final manuscript.
large-scale dataset (D. melanogaster male)	w1118 male gonad replicate 2 gene-level read counts based on STAR alignments and FlyBase 2017_03 annotation	NCBI GEO; This paper	NCBI GEO GSE99574:GSM2647324_w1118_GO_m_r2.htseq_reverse.txt.gz	Based on alternative STAR alignments. Not used in final manuscript.
large-scale dataset (D. melanogaster male)	w1118 male gonad replicate 3 gene-level read counts based on STAR alignments and FlyBase 2017_03 annotation	NCBI GEO; This paper	NCBI GEO GSE99574:GSM2647325_w1118_GO_m_r3.htseq_reverse.txt.gz	Based on alternative STAR alignments. Not used in final manuscript.
large-scale dataset (D. melanogaster male)	w1118 male gonad replicate 4 gene-level read counts based on STAR alignments and FlyBase 2017_03 annotation	NCBI GEO; This paper	NCBI GEO GSE99574:GSM2817334_w1118_GO_m_r4.htseq_reverse.txt.gz	Based on alternative STAR alignments. Not used in final manuscript.
large-scale dataset (D. melanogaster male)	w1118 male head replicate 1 gene-level read counts based on STAR alignments and FlyBase 2017_03 annotation	NCBI GEO; This paper	NCBI GEO GSE99574:GSM2647329_w1118_HD_m_r1.htseq_reverse.txt.gz	Based on alternative STAR alignments. Not used in final manuscript.
large-scale dataset (D. melanogaster male)	w1118 male head replicate 2 gene-level read counts based on STAR alignments and FlyBase 2017_03 annotation	NCBI GEO; This paper	NCBI GEO GSE99574:GSM2647330_w1118_HD_m_r2.htseq_reverse.txt.gz	Based on alternative STAR alignments. Not used in final manuscript.
large-scale dataset (D. melanogaster male)	w1118 male head replicate 3 gene-level read counts based on STAR alignments and FlyBase 2017_03 annotation	NCBI GEO; This paper	NCBI GEO GSE99574:GSM2647331_w1118_HD_m_r3.htseq_reverse.txt.gz	Based on alternative STAR alignments. Not used in final manuscript.
large-scale dataset (D. melanogaster male)	w1118 male head replicate 4 gene-level read counts based on STAR alignments and FlyBase 2017_03 annotation	NCBI GEO; This paper	NCBI GEO GSE99574:GSM2817336_w1118_HD_m_r4.htseq_reverse.txt.gz	Based on alternative STAR alignments. Not used in final manuscript.
large-scale dataset (D. melanogaster male)	w1118 male internal reproductive tract replicate 1 gene-level read counts based on STAR alignments and FlyBase 2017_03 annotation	NCBI GEO; This paper	NCBI GEO GSE99574:GSM2647335_w1118_RE_m_r1.htseq_reverse.txt.gz	Based on alternative STAR alignments. Not used in final manuscript.
large-scale dataset (D. melanogaster male)	w1118 male internal reproductive tract replicate 2 gene-level read counts based on STAR alignments and FlyBase 2017_03 annotation	NCBI GEO; This paper	NCBI GEO GSE99574:GSM2647336_w1118_RE_m_r2.htseq_reverse.txt.gz	Based on alternative STAR alignments. Not used in final manuscript.
large-scale dataset (D. melanogaster male)	w1118 male internal reproductive tract replicate 3 gene-level read counts based on STAR alignments and FlyBase 2017_03 annotation	NCBI GEO; This paper	NCBI GEO GSE99574:GSM2647337_w1118_RE_m_r3.htseq_reverse.txt.gz	Based on alternative STAR alignments. Not used in final manuscript.
large-scale dataset (D. melanogaster male)	w1118 male internal reproductive tract replicate 4 gene-level read counts based on STAR alignments and FlyBase 2017_03 annotation	NCBI GEO; This paper	NCBI GEO GSE99574:GSM2817338_w1118_RE_m_r4.htseq_reverse.txt.gz	Based on alternative STAR alignments. Not used in final manuscript.
large-scale dataset (D. melanogaster male)	w1118 male thorax replicate 1 gene-level read counts based on STAR alignments and FlyBase 2017_03 annotation	NCBI GEO; This paper	NCBI GEO GSE99574:GSM2647341_w1118_TX_m_r1.htseq_reverse.txt.gz	Based on alternative STAR alignments. Not used in final manuscript.
large-scale dataset (D. melanogaster male)	w1118 male thorax replicate 2 gene-level read counts based on STAR alignments and FlyBase 2017_03 annotation	NCBI GEO; This paper	NCBI GEO GSE99574:GSM2647342_w1118_TX_m_r2.htseq_reverse.txt.gz	Based on alternative STAR alignments. Not used in final manuscript.
large-scale dataset (D. melanogaster male)	w1118 male thorax replicate 3 gene-level read counts based on STAR alignments and FlyBase 2017_03 annotation	NCBI GEO; This paper	NCBI GEO GSE99574:GSM2647343_w1118_TX_m_r3.htseq_reverse.txt.gz	Based on alternative STAR alignments. Not used in final manuscript.
large-scale dataset (D. melanogaster male)	w1118 male thorax replicate 4 gene-level read counts based on STAR alignments and FlyBase 2017_03 annotation	NCBI GEO; This paper	NCBI GEO GSE99574:GSM2817340_w1118_TX_m_r4.htseq_reverse.txt.gz	Based on alternative STAR alignments. Not used in final manuscript.
large-scale dataset (D. melanogaster male)	w1118 male whole organism replicate 1 gene-level read counts based on STAR alignments and FlyBase 2017_03 annotation	NCBI GEO; This paper	NCBI GEO GSE99574:GSM2647347_w1118_WB_m_r1.htseq_reverse.txt.gz	Based on alternative STAR alignments. Not used in final manuscript.
large-scale dataset (D. melanogaster male)	w1118 male whole organism replicate 2 gene-level read counts based on STAR alignments and FlyBase 2017_03 annotation	NCBI GEO; This paper	NCBI GEO GSE99574:GSM2647348_w1118_WB_m_r2.htseq_reverse.txt.gz	Based on alternative STAR alignments. Not used in final manuscript.
large-scale dataset (D. melanogaster male)	w1118 male whole organism replicate 3 gene-level read counts based on STAR alignments and FlyBase 2017_03 annotation	NCBI GEO; This paper	NCBI GEO GSE99574:GSM2647349_w1118_WB_m_r3.htseq_reverse.txt.gz	Based on alternative STAR alignments. Not used in final manuscript.
large-scale dataset (D. melanogaster male)	w1118 male whole organism replicate 4 gene-level read counts based on STAR alignments and FlyBase 2017_03 annotation	NCBI GEO; This paper	NCBI GEO GSE99574:GSM2817342_w1118_WB_m_r4.htseq_reverse.txt.gz	Based on alternative STAR alignments. Not used in final manuscript.
large-scale dataset (D. ananassae female)	Dana female abdomen replicate 1 gene-level read counts based on HiSAT2 alignments and YO annotation	NCBI GEO; This paper	NCBI GEO GSE99574:GSM2646960_dana_AC_f_r1.htseq_reverse.HiSAT2.YO.txt.gz	Based on alignments with YO annotation. Used in mansucript.
large-scale dataset (D. ananassae female)	Dana female abdomen replicate 2 gene-level read counts based on HiSAT2 alignments and YO annotation	NCBI GEO; This paper	NCBI GEO GSE99574:GSM2646961_dana_AC_f_r2.htseq_reverse.HiSAT2.YO.txt.gz	Based on alignments with YO annotation. Used in mansucript.
large-scale dataset (D. ananassae female)	Dana female abdomen replicate 3 gene-level read counts based on HiSAT2 alignments and YO annotation	NCBI GEO; This paper	NCBI GEO GSE99574:GSM2646962_dana_AC_f_r3.htseq_reverse.HiSAT2.YO.txt.gz	Based on alignments with YO annotation. Used in mansucript.
large-scale dataset (D. ananassae female)	Dana female abdomen replicate 4 gene-level read counts based on HiSAT2 alignments and YO annotation	NCBI GEO; This paper	NCBI GEO GSE99574:GSM2817213_dana_AC_f_r4.htseq_reverse.HiSAT2.YO.txt.gz	Based on alignments with YO annotation. Used in mansucript.
large-scale dataset (D. ananassae female)	Dana female viscera replicate 1 gene-level read counts based on HiSAT2 alignments and YO annotation	NCBI GEO; This paper	NCBI GEO GSE99574:GSM2646966_dana_DG_f_r1.htseq_reverse.HiSAT2.YO.txt.gz	Based on alignments with YO annotation. Used in mansucript.
large-scale dataset (D. ananassae female)	Dana female viscera replicate 2 gene-level read counts based on HiSAT2 alignments and YO annotation	NCBI GEO; This paper	NCBI GEO GSE99574:GSM2646967_dana_DG_f_r2.htseq_reverse.HiSAT2.YO.txt.gz	Based on alignments with YO annotation. Used in mansucript.
large-scale dataset (D. ananassae female)	Dana female viscera replicate 3 gene-level read counts based on HiSAT2 alignments and YO annotation	NCBI GEO; This paper	NCBI GEO GSE99574:GSM2646968_dana_DG_f_r3.htseq_reverse.HiSAT2.YO.txt.gz	Based on alignments with YO annotation. Used in mansucript.
large-scale dataset (D. ananassae female)	Dana female viscera replicate 4 gene-level read counts based on HiSAT2 alignments and YO annotation	NCBI GEO; This paper	NCBI GEO GSE99574:GSM2817215_dana_DG_f_r4.htseq_reverse.HiSAT2.YO.txt.gz	Based on alignments with YO annotation. Used in mansucript.
large-scale dataset (D. ananassae female)	Dana female gonad replicate 1 gene-level read counts based on HiSAT2 alignments and YO annotation	NCBI GEO; This paper	NCBI GEO GSE99574:GSM2646972_dana_GO_f_r1.htseq_reverse.HiSAT2.YO.txt.gz	Based on alignments with YO annotation. Used in mansucript.
large-scale dataset (D. ananassae female)	Dana female gonad replicate 2 gene-level read counts based on HiSAT2 alignments and YO annotation	NCBI GEO; This paper	NCBI GEO GSE99574:GSM2646973_dana_GO_f_r2.htseq_reverse.HiSAT2.YO.txt.gz	Based on alignments with YO annotation. Used in mansucript.
large-scale dataset (D. ananassae female)	Dana female gonad replicate 3 gene-level read counts based on HiSAT2 alignments and YO annotation	NCBI GEO; This paper	NCBI GEO GSE99574:GSM2646974_dana_GO_f_r3.htseq_reverse.HiSAT2.YO.txt.gz	Based on alignments with YO annotation. Used in mansucript.
large-scale dataset (D. ananassae female)	Dana female gonad replicate 4 gene-level read counts based on HiSAT2 alignments and YO annotation	NCBI GEO; This paper	NCBI GEO GSE99574:GSM2817217_dana_GO_f_r4.htseq_reverse.HiSAT2.YO.txt.gz	Based on alignments with YO annotation. Used in mansucript.
large-scale dataset (D. ananassae female)	Dana female head replicate 1 gene-level read counts based on HiSAT2 alignments and YO annotation	NCBI GEO; This paper	NCBI GEO GSE99574:GSM2646978_dana_HD_f_r1.htseq_reverse.HiSAT2.YO.txt.gz	Based on alignments with YO annotation. Used in mansucript.
large-scale dataset (D. ananassae female)	Dana female head replicate 2 gene-level read counts based on HiSAT2 alignments and YO annotation	NCBI GEO; This paper	NCBI GEO GSE99574:GSM2646979_dana_HD_f_r2.htseq_reverse.HiSAT2.YO.txt.gz	Based on alignments with YO annotation. Used in mansucript.
large-scale dataset (D. ananassae female)	Dana female head replicate 3 gene-level read counts based on HiSAT2 alignments and YO annotation	NCBI GEO; This paper	NCBI GEO GSE99574:GSM2646980_dana_HD_f_r3.htseq_reverse.HiSAT2.YO.txt.gz	Based on alignments with YO annotation. Used in mansucript.
large-scale dataset (D. ananassae female)	Dana female head replicate 4 gene-level read counts based on HiSAT2 alignments and YO annotation	NCBI GEO; This paper	NCBI GEO GSE99574:GSM2817219_dana_HD_f_r4.htseq_reverse.HiSAT2.YO.txt.gz	Based on alignments with YO annotation. Used in mansucript.
large-scale dataset (D. ananassae female)	Dana female reproductive tract replicate 1 gene-level read counts based on HiSAT2 alignments and YO annotation	NCBI GEO; This paper	NCBI GEO GSE99574:GSM2646984_dana_RE_f_r1.htseq_reverse.HiSAT2.YO.txt.gz	Based on alignments with YO annotation. Used in mansucript.
large-scale dataset (D. ananassae female)	Dana female reproductive tract replicate 2 gene-level read counts based on HiSAT2 alignments and YO annotation	NCBI GEO; This paper	NCBI GEO GSE99574:GSM2646985_dana_RE_f_r2.htseq_reverse.HiSAT2.YO.txt.gz	Based on alignments with YO annotation. Used in mansucript.
large-scale dataset (D. ananassae female)	Dana female reproductive tract replicate 3 gene-level read counts based on HiSAT2 alignments and YO annotation	NCBI GEO; This paper	NCBI GEO GSE99574:GSM2646986_dana_RE_f_r3.htseq_reverse.HiSAT2.YO.txt.gz	Based on alignments with YO annotation. Used in mansucript.
large-scale dataset (D. ananassae female)	Dana female reproductive tract replicate 4 gene-level read counts based on HiSAT2 alignments and YO annotation	NCBI GEO; This paper	NCBI GEO GSE99574:GSM2817221_dana_RE_f_r4.htseq_reverse.HiSAT2.YO.txt.gz	Based on alignments with YO annotation. Used in mansucript.
large-scale dataset (D. ananassae female)	Dana female thorax replicate 1 gene-level read counts based on HiSAT2 alignments and YO annotation	NCBI GEO; This paper	NCBI GEO GSE99574:GSM2646990_dana_TX_f_r1.htseq_reverse.HiSAT2.YO.txt.gz	Based on alignments with YO annotation. Used in mansucript.
large-scale dataset (D. ananassae female)	Dana female thorax replicate 2 gene-level read counts based on HiSAT2 alignments and YO annotation	NCBI GEO; This paper	NCBI GEO GSE99574:GSM2646991_dana_TX_f_r2.htseq_reverse.HiSAT2.YO.txt.gz	Based on alignments with YO annotation. Used in mansucript.
large-scale dataset (D. ananassae female)	Dana female thorax replicate 3 gene-level read counts based on HiSAT2 alignments and YO annotation	NCBI GEO; This paper	NCBI GEO GSE99574:GSM2646992_dana_TX_f_r3.htseq_reverse.HiSAT2.YO.txt.gz	Based on alignments with YO annotation. Used in mansucript.
large-scale dataset (D. ananassae female)	Dana female thorax replicate 4 gene-level read counts based on HiSAT2 alignments and YO annotation	NCBI GEO; This paper	NCBI GEO GSE99574:GSM2817223_dana_TX_f_r4.htseq_reverse.HiSAT2.YO.txt.gz	Based on alignments with YO annotation. Used in mansucript.
large-scale dataset (D. ananassae female)	Dana female whole organism replicate 1 gene-level read counts based on HiSAT2 alignments and YO annotation	NCBI GEO; This paper	NCBI GEO GSE99574:GSM2646996_dana_WB_f_r1.htseq_reverse.HiSAT2.YO.txt.gz	Based on alignments with YO annotation. Used in mansucript.
large-scale dataset (D. ananassae female)	Dana female whole organism replicate 2 gene-level read counts based on HiSAT2 alignments and YO annotation	NCBI GEO; This paper	NCBI GEO GSE99574:GSM2646997_dana_WB_f_r2.htseq_reverse.HiSAT2.YO.txt.gz	Based on alignments with YO annotation. Used in mansucript.
large-scale dataset (D. ananassae female)	Dana female whole organism replicate 3 gene-level read counts based on HiSAT2 alignments and YO annotation	NCBI GEO; This paper	NCBI GEO GSE99574:GSM2646998_dana_WB_f_r3.htseq_reverse.HiSAT2.YO.txt.gz	Based on alignments with YO annotation. Used in mansucript.
large-scale dataset (D. ananassae female)	Dana female whole organism replicate 4 gene-level read counts based on HiSAT2 alignments and YO annotation	NCBI GEO; This paper	NCBI GEO GSE99574:GSM2817225_dana_WB_f_r4.htseq_reverse.HiSAT2.YO.txt.gz	Based on alignments with YO annotation. Used in mansucript.
large-scale dataset (D. ananassae male)	Dana male abdomen replicate 1 gene-level read counts based on HiSAT2 alignments and YO annotation	NCBI GEO; This paper	NCBI GEO GSE99574:GSM2646963_dana_AC_m_r1.htseq_reverse.HiSAT2.YO.txt.gz	Based on alignments with YO annotation. Used in mansucript.
large-scale dataset (D. ananassae male)	Dana male abdomen replicate 2 gene-level read counts based on HiSAT2 alignments and YO annotation	NCBI GEO; This paper	NCBI GEO GSE99574:GSM2646964_dana_AC_m_r2.htseq_reverse.HiSAT2.YO.txt.gz	Based on alignments with YO annotation. Used in mansucript.
large-scale dataset (D. ananassae male)	Dana male abdomen replicate 3 gene-level read counts based on HiSAT2 alignments and YO annotation	NCBI GEO; This paper	NCBI GEO GSE99574:GSM2646965_dana_AC_m_r3.htseq_reverse.HiSAT2.YO.txt.gz	Based on alignments with YO annotation. Used in mansucript.
large-scale dataset (D. ananassae male)	Dana male abdomen replicate 4 gene-level read counts based on HiSAT2 alignments and YO annotation	NCBI GEO; This paper	NCBI GEO GSE99574:GSM2817214_dana_AC_m_r4.htseq_reverse.HiSAT2.YO.txt.gz	Based on alignments with YO annotation. Used in mansucript.
large-scale dataset (D. ananassae male)	Dana male viscera replicate 1 gene-level read counts based on HiSAT2 alignments and YO annotation	NCBI GEO; This paper	NCBI GEO GSE99574:GSM2646969_dana_DG_m_r1.htseq_reverse.HiSAT2.YO.txt.gz	Based on alignments with YO annotation. Used in mansucript.
large-scale dataset (D. ananassae male)	Dana male viscera replicate 2 gene-level read counts based on HiSAT2 alignments and YO annotation	NCBI GEO; This paper	NCBI GEO GSE99574:GSM2646970_dana_DG_m_r2.htseq_reverse.HiSAT2.YO.txt.gz	Based on alignments with YO annotation. Used in mansucript.
large-scale dataset (D. ananassae male)	Dana male viscera replicate 3 gene-level read counts based on HiSAT2 alignments and YO annotation	NCBI GEO; This paper	NCBI GEO GSE99574:GSM2646971_dana_DG_m_r3.htseq_reverse.HiSAT2.YO.txt.gz	Based on alignments with YO annotation. Used in mansucript.
large-scale dataset (D. ananassae male)	Dana male viscera replicate 4 gene-level read counts based on HiSAT2 alignments and YO annotation	NCBI GEO; This paper	NCBI GEO GSE99574:GSM2817216_dana_DG_m_r4.htseq_reverse.HiSAT2.YO.txt.gz	Based on alignments with YO annotation. Used in mansucript.
large-scale dataset (D. ananassae male)	Dana male gonad replicate 1 gene-level read counts based on HiSAT2 alignments and YO annotation	NCBI GEO; This paper	NCBI GEO GSE99574:GSM2646975_dana_GO_m_r1.htseq_reverse.HiSAT2.YO.txt.gz	Based on alignments with YO annotation. Used in mansucript.
large-scale dataset (D. ananassae male)	Dana male gonad replicate 2 gene-level read counts based on HiSAT2 alignments and YO annotation	NCBI GEO; This paper	NCBI GEO GSE99574:GSM2646976_dana_GO_m_r2.htseq_reverse.HiSAT2.YO.txt.gz	Based on alignments with YO annotation. Used in mansucript.
large-scale dataset (D. ananassae male)	Dana male gonad replicate 3 gene-level read counts based on HiSAT2 alignments and YO annotation	NCBI GEO; This paper	NCBI GEO GSE99574:GSM2646977_dana_GO_m_r3.htseq_reverse.HiSAT2.YO.txt.gz	Based on alignments with YO annotation. Used in mansucript.
large-scale dataset (D. ananassae male)	Dana male gonad replicate 4 gene-level read counts based on HiSAT2 alignments and YO annotation	NCBI GEO; This paper	NCBI GEO GSE99574:GSM2817218_dana_GO_m_r4.htseq_reverse.HiSAT2.YO.txt.gz	Based on alignments with YO annotation. Used in mansucript.
large-scale dataset (D. ananassae male)	Dana male head replicate 1 gene-level read counts based on HiSAT2 alignments and YO annotation	NCBI GEO; This paper	NCBI GEO GSE99574:GSM2646981_dana_HD_m_r1.htseq_reverse.HiSAT2.YO.txt.gz	Based on alignments with YO annotation. Used in mansucript.
large-scale dataset (D. ananassae male)	Dana male head replicate 2 gene-level read counts based on HiSAT2 alignments and YO annotation	NCBI GEO; This paper	NCBI GEO GSE99574:GSM2646982_dana_HD_m_r2.htseq_reverse.HiSAT2.YO.txt.gz	Based on alignments with YO annotation. Used in mansucript.
large-scale dataset (D. ananassae male)	Dana male head replicate 3 gene-level read counts based on HiSAT2 alignments and YO annotation	NCBI GEO; This paper	NCBI GEO GSE99574:GSM2646983_dana_HD_m_r3.htseq_reverse.HiSAT2.YO.txt.gz	Based on alignments with YO annotation. Used in mansucript.
large-scale dataset (D. ananassae male)	Dana male head replicate 4 gene-level read counts based on HiSAT2 alignments and YO annotation	NCBI GEO; This paper	NCBI GEO GSE99574:GSM2817220_dana_HD_m_r4.htseq_reverse.HiSAT2.YO.txt.gz	Based on alignments with YO annotation. Used in mansucript.
large-scale dataset (D. ananassae male)	Dana male reproductive tract replicate 1 gene-level read counts based on HiSAT2 alignments and YO annotation	NCBI GEO; This paper	NCBI GEO GSE99574:GSM2646987_dana_RE_m_r1.htseq_reverse.HiSAT2.YO.txt.gz	Based on alignments with YO annotation. Used in mansucript.
large-scale dataset (D. ananassae male)	Dana male reproductive tract replicate 2 gene-level read counts based on HiSAT2 alignments and YO annotation	NCBI GEO; This paper	NCBI GEO GSE99574:GSM2646988_dana_RE_m_r2.htseq_reverse.HiSAT2.YO.txt.gz	Based on alignments with YO annotation. Used in mansucript.
large-scale dataset (D. ananassae male)	Dana male reproductive tract replicate 3 gene-level read counts based on HiSAT2 alignments and YO annotation	NCBI GEO; This paper	NCBI GEO GSE99574:GSM2646989_dana_RE_m_r3.htseq_reverse.HiSAT2.YO.txt.gz	Based on alignments with YO annotation. Used in mansucript.
large-scale dataset (D. ananassae male)	Dana male reproductive tract replicate 4 gene-level read counts based on HiSAT2 alignments and YO annotation	NCBI GEO; This paper	NCBI GEO GSE99574:GSM2817222_dana_RE_m_r4.htseq_reverse.HiSAT2.YO.txt.gz	Based on alignments with YO annotation. Used in mansucript.
large-scale dataset (D. ananassae male)	Dana male thorax replicate 1 gene-level read counts based on HiSAT2 alignments and YO annotation	NCBI GEO; This paper	NCBI GEO GSE99574:GSM2646993_dana_TX_m_r1.htseq_reverse.HiSAT2.YO.txt.gz	Based on alignments with YO annotation. Used in mansucript.
large-scale dataset (D. ananassae male)	Dana male thorax replicate 2 gene-level read counts based on HiSAT2 alignments and YO annotation	NCBI GEO; This paper	NCBI GEO GSE99574:GSM2646994_dana_TX_m_r2.htseq_reverse.HiSAT2.YO.txt.gz	Based on alignments with YO annotation. Used in mansucript.
large-scale dataset (D. ananassae male)	Dana male thorax replicate 3 gene-level read counts based on HiSAT2 alignments and YO annotation	NCBI GEO; This paper	NCBI GEO GSE99574:GSM2646995_dana_TX_m_r3.htseq_reverse.HiSAT2.YO.txt.gz	Based on alignments with YO annotation. Used in mansucript.
large-scale dataset (D. ananassae male)	Dana male thorax replicate 4 gene-level read counts based on HiSAT2 alignments and YO annotation	NCBI GEO; This paper	NCBI GEO GSE99574:GSM2817224_dana_TX_m_r4.htseq_reverse.HiSAT2.YO.txt.gz	Based on alignments with YO annotation. Used in mansucript.
large-scale dataset (D. ananassae male)	Dana male whole organism replicate 1 gene-level read counts based on HiSAT2 alignments and YO annotation	NCBI GEO; This paper	NCBI GEO GSE99574:GSM2646999_dana_WB_m_r1.htseq_reverse.HiSAT2.YO.txt.gz	Based on alignments with YO annotation. Used in mansucript.
large-scale dataset (D. ananassae male)	Dana male whole organism replicate 2 gene-level read counts based on HiSAT2 alignments and YO annotation	NCBI GEO; This paper	NCBI GEO GSE99574:GSM2647000_dana_WB_m_r2.htseq_reverse.HiSAT2.YO.txt.gz	Based on alignments with YO annotation. Used in mansucript.
large-scale dataset (D. ananassae male)	Dana male whole organism replicate 3 gene-level read counts based on HiSAT2 alignments and YO annotation	NCBI GEO; This paper	NCBI GEO GSE99574:GSM2647001_dana_WB_m_r3.htseq_reverse.HiSAT2.YO.txt.gz	Based on alignments with YO annotation. Used in mansucript.
large-scale dataset (D. ananassae male)	Dana male whole organism replicate 4 gene-level read counts based on HiSAT2 alignments and YO annotation	NCBI GEO; This paper	NCBI GEO GSE99574:GSM2817226_dana_WB_m_r4.htseq_reverse.HiSAT2.YO.txt.gz	Based on alignments with YO annotation. Used in mansucript.
large-scale dataset (D. grimshawi female)	Dgri female abdomen replicate 1 gene-level read counts based on HiSAT2 alignments and YO annotation	NCBI GEO; This paper	NCBI GEO GSM2113124:GSM2113124_dgriG1_f_ac_R1.htseq_reverse.HiSAT2.YO.txt.gz	Based on alignments with YO annotation. Used in mansucript.
large-scale dataset (D. grimshawi female)	Dgri female abdomen replicate 2 gene-level read counts based on HiSAT2 alignments and YO annotation	NCBI GEO; This paper	NCBI GEO GSM2113125:GSM2113125_dgriG1_f_ac_R2.htseq_reverse.HiSAT2.YO.txt.gz	Based on alignments with YO annotation. Used in mansucript.
large-scale dataset (D. grimshawi female)	Dgri female abdomen replicate 3 gene-level read counts based on HiSAT2 alignments and YO annotation	NCBI GEO; This paper	NCBI GEO GSM2113126:GSM2113126_dgriG1_f_ac_R3.htseq_reverse.HiSAT2.YO.txt.gz	Based on alignments with YO annotation. Used in mansucript.
large-scale dataset (D. grimshawi female)	Dgri female abdomen replicate 4 gene-level read counts based on HiSAT2 alignments and YO annotation	NCBI GEO; This paper	NCBI GEO GSM2113127:GSM2113127_dgriG1_f_ac_R4.htseq_reverse.HiSAT2.YO.txt.gz	Based on alignments with YO annotation. Used in mansucript.
large-scale dataset (D. grimshawi female)	Dgri female viscera replicate 1 gene-level read counts based on HiSAT2 alignments and YO annotation	NCBI GEO; This paper	NCBI GEO GSM2113128:GSM2113128_dgriG1_f_dg_R1.htseq_reverse.HiSAT2.YO.txt.gz	Based on alignments with YO annotation. Used in mansucript.
large-scale dataset (D. grimshawi female)	Dgri female viscera replicate 2 gene-level read counts based on HiSAT2 alignments and YO annotation	NCBI GEO; This paper	NCBI GEO GSM2113129:GSM2113129_dgriG1_f_dg_R2.htseq_reverse.HiSAT2.YO.txt.gz	Based on alignments with YO annotation. Used in mansucript.
large-scale dataset (D. grimshawi female)	Dgri female viscera replicate 3 gene-level read counts based on HiSAT2 alignments and YO annotation	NCBI GEO; This paper	NCBI GEO GSM2113130:GSM2113130_dgriG1_f_dg_R3.htseq_reverse.HiSAT2.YO.txt.gz	Based on alignments with YO annotation. Used in mansucript.
large-scale dataset (D. grimshawi female)	Dgri female viscera replicate 4 gene-level read counts based on HiSAT2 alignments and YO annotation	NCBI GEO; This paper	NCBI GEO GSM2113131:GSM2113131_dgriG1_f_dg_R4.htseq_reverse.HiSAT2.YO.txt.gz	Based on alignments with YO annotation. Used in mansucript.
large-scale dataset (D. grimshawi female)	Dgri female terminalia replicate 1 gene-level read counts based on HiSAT2 alignments and YO annotation	NCBI GEO; This paper	NCBI GEO GSM2113132:GSM2113132_dgriG1_f_ge_R1.htseq_reverse.HiSAT2.YO.txt.gz	Based on alignments with YO annotation. Used in mansucript.
large-scale dataset (D. grimshawi female)	Dgri female terminalia replicate 2 gene-level read counts based on HiSAT2 alignments and YO annotation	NCBI GEO; This paper	NCBI GEO GSM2113133:GSM2113133_dgriG1_f_ge_R2.htseq_reverse.HiSAT2.YO.txt.gz	Based on alignments with YO annotation. Used in mansucript.
large-scale dataset (D. grimshawi female)	Dgri female terminalia replicate 3 gene-level read counts based on HiSAT2 alignments and YO annotation	NCBI GEO; This paper	NCBI GEO GSM2113134:GSM2113134_dgriG1_f_ge_R3.htseq_reverse.HiSAT2.YO.txt.gz	Based on alignments with YO annotation. Used in mansucript.
large-scale dataset (D. grimshawi female)	Dgri female terminalia replicate 4 gene-level read counts based on HiSAT2 alignments and YO annotation	NCBI GEO; This paper	NCBI GEO GSM2113135:GSM2113135_dgriG1_f_ge_R4.htseq_reverse.HiSAT2.YO.txt.gz	Based on alignments with YO annotation. Used in mansucript.
large-scale dataset (D. grimshawi female)	Dgri female gonad replicate 1 gene-level read counts based on HiSAT2 alignments and YO annotation	NCBI GEO; This paper	NCBI GEO GSM2113136:GSM2113136_dgriG1_f_go_R1.htseq_reverse.HiSAT2.YO.txt.gz	Based on alignments with YO annotation. Used in mansucript.
large-scale dataset (D. grimshawi female)	Dgri female gonad replicate 2 gene-level read counts based on HiSAT2 alignments and YO annotation	NCBI GEO; This paper	NCBI GEO GSM2113137:GSM2113137_dgriG1_f_go_R2.htseq_reverse.HiSAT2.YO.txt.gz	Based on alignments with YO annotation. Used in mansucript.
large-scale dataset (D. grimshawi female)	Dgri female gonad replicate 3 gene-level read counts based on HiSAT2 alignments and YO annotation	NCBI GEO; This paper	NCBI GEO GSM2113138:GSM2113138_dgriG1_f_go_R3.htseq_reverse.HiSAT2.YO.txt.gz	Based on alignments with YO annotation. Used in mansucript.
large-scale dataset (D. grimshawi female)	Dgri female gonad replicate 4 gene-level read counts based on HiSAT2 alignments and YO annotation	NCBI GEO; This paper	NCBI GEO GSM2113139:GSM2113139_dgriG1_f_go_R4.htseq_reverse.HiSAT2.YO.txt.gz	Based on alignments with YO annotation. Used in mansucript.
large-scale dataset (D. grimshawi female)	Dgri female head replicate 1 gene-level read counts based on HiSAT2 alignments and YO annotation	NCBI GEO; This paper	NCBI GEO GSM2113140:GSM2113140_dgriG1_f_hd_R1.htseq_reverse.HiSAT2.YO.txt.gz	Based on alignments with YO annotation. Used in mansucript.
large-scale dataset (D. grimshawi female)	Dgri female head replicate 2 gene-level read counts based on HiSAT2 alignments and YO annotation	NCBI GEO; This paper	NCBI GEO GSM2113141:GSM2113141_dgriG1_f_hd_R2.htseq_reverse.HiSAT2.YO.txt.gz	Based on alignments with YO annotation. Used in mansucript.
large-scale dataset (D. grimshawi female)	Dgri female head replicate 3 gene-level read counts based on HiSAT2 alignments and YO annotation	NCBI GEO; This paper	NCBI GEO GSM2113142:GSM2113142_dgriG1_f_hd_R3.htseq_reverse.HiSAT2.YO.txt.gz	Based on alignments with YO annotation. Used in mansucript.
large-scale dataset (D. grimshawi female)	Dgri female head replicate 4 gene-level read counts based on HiSAT2 alignments and YO annotation	NCBI GEO; This paper	NCBI GEO GSM2113143:GSM2113143_dgriG1_f_hd_R4.htseq_reverse.HiSAT2.YO.txt.gz	Based on alignments with YO annotation. Used in mansucript.
large-scale dataset (D. grimshawi female)	Dgri female internal reproductive tract replicate 1 gene-level read counts based on HiSAT2 alignments and YO annotation	NCBI GEO; This paper	NCBI GEO GSM2113144:GSM2113144_dgriG1_f_re_R1.htseq_reverse.HiSAT2.YO.txt.gz	Based on alignments with YO annotation. Used in mansucript.
large-scale dataset (D. grimshawi female)	Dgri female internal reproductive tract replicate 2 gene-level read counts based on HiSAT2 alignments and YO annotation	NCBI GEO; This paper	NCBI GEO GSM2113145:GSM2113145_dgriG1_f_re_R2.htseq_reverse.HiSAT2.YO.txt.gz	Based on alignments with YO annotation. Used in mansucript.
large-scale dataset (D. grimshawi female)	Dgri female internal reproductive tract replicate 3 gene-level read counts based on HiSAT2 alignments and YO annotation	NCBI GEO; This paper	NCBI GEO GSM2113146:GSM2113146_dgriG1_f_re_R3.htseq_reverse.HiSAT2.YO.txt.gz	Based on alignments with YO annotation. Used in mansucript.
large-scale dataset (D. grimshawi female)	Dgri female internal reproductive tract replicate 4 gene-level read counts based on HiSAT2 alignments and YO annotation	NCBI GEO; This paper	NCBI GEO GSM2113147:GSM2113147_dgriG1_f_re_R4.htseq_reverse.HiSAT2.YO.txt.gz	Based on alignments with YO annotation. Used in mansucript.
large-scale dataset (D. grimshawi female)	Dgri female thorax replicate 1 gene-level read counts based on HiSAT2 alignments and YO annotation	NCBI GEO; This paper	NCBI GEO GSM2113148:GSM2113148_dgriG1_f_tx_R1.htseq_reverse.HiSAT2.YO.txt.gz	Based on alignments with YO annotation. Used in mansucript.
large-scale dataset (D. grimshawi female)	Dgri female thorax replicate 2 gene-level read counts based on HiSAT2 alignments and YO annotation	NCBI GEO; This paper	NCBI GEO GSM2113149:GSM2113149_dgriG1_f_tx_R2.htseq_reverse.HiSAT2.YO.txt.gz	Based on alignments with YO annotation. Used in mansucript.
large-scale dataset (D. grimshawi female)	Dgri female thorax replicate 3 gene-level read counts based on HiSAT2 alignments and YO annotation	NCBI GEO; This paper	NCBI GEO GSM2113150:GSM2113150_dgriG1_f_tx_R3.htseq_reverse.HiSAT2.YO.txt.gz	Based on alignments with YO annotation. Used in mansucript.
large-scale dataset (D. grimshawi female)	Dgri female thorax replicate 4 gene-level read counts based on HiSAT2 alignments and YO annotation	NCBI GEO; This paper	NCBI GEO GSM2113151:GSM2113151_dgriG1_f_tx_R4.htseq_reverse.HiSAT2.YO.txt.gz	Based on alignments with YO annotation. Used in mansucript.
large-scale dataset (D. grimshawi female)	Dgri female whole organism replicate 1 gene-level read counts based on HiSAT2 alignments and YO annotation	NCBI GEO; This paper	NCBI GEO GSM2113152:GSM2113152_dgriG1_f_wb_R1.htseq_reverse.HiSAT2.YO.txt.gz	Based on alignments with YO annotation. Used in mansucript.
large-scale dataset (D. grimshawi female)	Dgri female whole organism replicate 2 gene-level read counts based on HiSAT2 alignments and YO annotation	NCBI GEO; This paper	NCBI GEO GSM2113153:GSM2113153_dgriG1_f_wb_R2.htseq_reverse.HiSAT2.YO.txt.gz	Based on alignments with YO annotation. Used in mansucript.
large-scale dataset (D. grimshawi female)	Dgri female whole organism replicate 3 gene-level read counts based on HiSAT2 alignments and YO annotation	NCBI GEO; This paper	NCBI GEO GSM2113154:GSM2113154_dgriG1_f_wb_R3.htseq_reverse.HiSAT2.YO.txt.gz	Based on alignments with YO annotation. Used in mansucript.
large-scale dataset (D. grimshawi female)	Dgri female whole organism replicate 4 gene-level read counts based on HiSAT2 alignments and YO annotation	NCBI GEO; This paper	NCBI GEO GSM2113155:GSM2113155_dgriG1_f_wb_R4.htseq_reverse.HiSAT2.YO.txt.gz	Based on alignments with YO annotation. Used in mansucript.
large-scale dataset (D. grimshawi male)	Dgri male abdomen replicate 1 gene-level read counts based on HiSAT2 alignments and YO annotation	NCBI GEO; This paper	NCBI GEO GSM2113156:GSM2113156_dgriG1_m_ac_R1.htseq_reverse.HiSAT2.YO.txt.gz	Based on alignments with YO annotation. Used in mansucript.
large-scale dataset (D. grimshawi male)	Dgri male abdomen replicate 2 gene-level read counts based on HiSAT2 alignments and YO annotation	NCBI GEO; This paper	NCBI GEO GSM2113157:GSM2113157_dgriG1_m_ac_R2.htseq_reverse.HiSAT2.YO.txt.gz	Based on alignments with YO annotation. Used in mansucript.
large-scale dataset (D. grimshawi male)	Dgri male abdomen replicate 3 gene-level read counts based on HiSAT2 alignments and YO annotation	NCBI GEO; This paper	NCBI GEO GSM2113158:GSM2113158_dgriG1_m_ac_R3.htseq_reverse.HiSAT2.YO.txt.gz	Based on alignments with YO annotation. Used in mansucript.
large-scale dataset (D. grimshawi male)	Dgri male abdomen replicate 4 gene-level read counts based on HiSAT2 alignments and YO annotation	NCBI GEO; This paper	NCBI GEO GSM2113159:GSM2113159_dgriG1_m_ac_R4.htseq_reverse.HiSAT2.YO.txt.gz	Based on alignments with YO annotation. Used in mansucript.
large-scale dataset (D. grimshawi male)	Dgri male viscera replicate 1 gene-level read counts based on HiSAT2 alignments and YO annotation	NCBI GEO; This paper	NCBI GEO GSM2113160:GSM2113160_dgriG1_m_dg_R1.htseq_reverse.HiSAT2.YO.txt.gz	Based on alignments with YO annotation. Used in mansucript.
large-scale dataset (D. grimshawi male)	Dgri male viscera replicate 2 gene-level read counts based on HiSAT2 alignments and YO annotation	NCBI GEO; This paper	NCBI GEO GSM2113161:GSM2113161_dgriG1_m_dg_R2.htseq_reverse.HiSAT2.YO.txt.gz	Based on alignments with YO annotation. Used in mansucript.
large-scale dataset (D. grimshawi male)	Dgri male viscera replicate 3 gene-level read counts based on HiSAT2 alignments and YO annotation	NCBI GEO; This paper	NCBI GEO GSM2113162:GSM2113162_dgriG1_m_dg_R3.htseq_reverse.HiSAT2.YO.txt.gz	Based on alignments with YO annotation. Used in mansucript.
large-scale dataset (D. grimshawi male)	Dgri male viscera replicate 4 gene-level read counts based on HiSAT2 alignments and YO annotation	NCBI GEO; This paper	NCBI GEO GSM2113163:GSM2113163_dgriG1_m_dg_R4.htseq_reverse.HiSAT2.YO.txt.gz	Based on alignments with YO annotation. Used in mansucript.
large-scale dataset (D. grimshawi male)	Dgri male terminalia replicate 1 gene-level read counts based on HiSAT2 alignments and YO annotation	NCBI GEO; This paper	NCBI GEO GSM2113164:GSM2113164_dgriG1_m_ge_R1.htseq_reverse.HiSAT2.YO.txt.gz	Based on alignments with YO annotation. Used in mansucript.
large-scale dataset (D. grimshawi male)	Dgri male terminalia replicate 2 gene-level read counts based on HiSAT2 alignments and YO annotation	NCBI GEO; This paper	NCBI GEO GSM2113165:GSM2113165_dgriG1_m_ge_R2.htseq_reverse.HiSAT2.YO.txt.gz	Based on alignments with YO annotation. Used in mansucript.
large-scale dataset (D. grimshawi male)	Dgri male terminalia replicate 3 gene-level read counts based on HiSAT2 alignments and YO annotation	NCBI GEO; This paper	NCBI GEO GSM2113166:GSM2113166_dgriG1_m_ge_R3.htseq_reverse.HiSAT2.YO.txt.gz	Based on alignments with YO annotation. Used in mansucript.
large-scale dataset (D. grimshawi male)	Dgri male terminalia replicate 4 gene-level read counts based on HiSAT2 alignments and YO annotation	NCBI GEO; This paper	NCBI GEO GSM2113167:GSM2113167_dgriG1_m_ge_R4.htseq_reverse.HiSAT2.YO.txt.gz	Based on alignments with YO annotation. Used in mansucript.
large-scale dataset (D. grimshawi male)	Dgri male gonad replicate 1 gene-level read counts based on HiSAT2 alignments and YO annotation	NCBI GEO; This paper	NCBI GEO GSM2113168:GSM2113168_dgriG1_m_go_R1.htseq_reverse.HiSAT2.YO.txt.gz	Based on alignments with YO annotation. Used in mansucript.
large-scale dataset (D. grimshawi male)	Dgri male gonad replicate 2 gene-level read counts based on HiSAT2 alignments and YO annotation	NCBI GEO; This paper	NCBI GEO GSM2113169:GSM2113169_dgriG1_m_go_R2.htseq_reverse.HiSAT2.YO.txt.gz	Based on alignments with YO annotation. Used in mansucript.
large-scale dataset (D. grimshawi male)	Dgri male gonad replicate 3 gene-level read counts based on HiSAT2 alignments and YO annotation	NCBI GEO; This paper	NCBI GEO GSM2113170:GSM2113170_dgriG1_m_go_R3.htseq_reverse.HiSAT2.YO.txt.gz	Based on alignments with YO annotation. Used in mansucript.
large-scale dataset (D. grimshawi male)	Dgri male gonad replicate 4 gene-level read counts based on HiSAT2 alignments and YO annotation	NCBI GEO; This paper	NCBI GEO GSM2113171:GSM2113171_dgriG1_m_go_R4.htseq_reverse.HiSAT2.YO.txt.gz	Based on alignments with YO annotation. Used in mansucript.
large-scale dataset (D. grimshawi male)	Dgri male head replicate 1 gene-level read counts based on HiSAT2 alignments and YO annotation	NCBI GEO; This paper	NCBI GEO GSM2113172:GSM2113172_dgriG1_m_hd_R1.htseq_reverse.HiSAT2.YO.txt.gz	Based on alignments with YO annotation. Used in mansucript.
large-scale dataset (D. grimshawi male)	Dgri male head replicate 2 gene-level read counts based on HiSAT2 alignments and YO annotation	NCBI GEO; This paper	NCBI GEO GSM2113173:GSM2113173_dgriG1_m_hd_R2.htseq_reverse.HiSAT2.YO.txt.gz	Based on alignments with YO annotation. Used in mansucript.
large-scale dataset (D. grimshawi male)	Dgri male head replicate 3 gene-level read counts based on HiSAT2 alignments and YO annotation	NCBI GEO; This paper	NCBI GEO GSM2113174:GSM2113174_dgriG1_m_hd_R3.htseq_reverse.HiSAT2.YO.txt.gz	Based on alignments with YO annotation. Used in mansucript.
large-scale dataset (D. grimshawi male)	Dgri male head replicate 4 gene-level read counts based on HiSAT2 alignments and YO annotation	NCBI GEO; This paper	NCBI GEO GSM2113175:GSM2113175_dgriG1_m_hd_R4.htseq_reverse.HiSAT2.YO.txt.gz	Based on alignments with YO annotation. Used in mansucript.
large-scale dataset (D. grimshawi male)	Dgri male internal reproductive tract replicate 1 gene-level read counts based on HiSAT2 alignments and YO annotation	NCBI GEO; This paper	NCBI GEO GSM2113176:GSM2113176_dgriG1_m_re_R1.htseq_reverse.HiSAT2.YO.txt.gz	Based on alignments with YO annotation. Used in mansucript.
large-scale dataset (D. grimshawi male)	Dgri male internal reproductive tract replicate 2 gene-level read counts based on HiSAT2 alignments and YO annotation	NCBI GEO; This paper	NCBI GEO GSM2113178:GSM2113178_dgriG1_m_re_R2b.htseq_reverse.HiSAT2.YO.txt.gz	Based on alignments with YO annotation. Used in mansucript.
large-scale dataset (D. grimshawi male)	Dgri male internal reproductive tract replicate 3 gene-level read counts based on HiSAT2 alignments and YO annotation	NCBI GEO; This paper	NCBI GEO GSM2113179:GSM2113179_dgriG1_m_re_R3.htseq_reverse.HiSAT2.YO.txt.gz	Based on alignments with YO annotation. Used in mansucript.
large-scale dataset (D. grimshawi male)	Dgri male internal reproductive tract replicate 4 gene-level read counts based on HiSAT2 alignments and YO annotation	NCBI GEO; This paper	NCBI GEO GSM2113180:GSM2113180_dgriG1_m_re_R4.htseq_reverse.HiSAT2.YO.txt.gz	Based on alignments with YO annotation. Used in mansucript.
large-scale dataset (D. grimshawi male)	Dgri male thorax replicate 1 gene-level read counts based on HiSAT2 alignments and YO annotation	NCBI GEO; This paper	NCBI GEO GSM2113181:GSM2113181_dgriG1_m_tx_R1.htseq_reverse.HiSAT2.YO.txt.gz	Based on alignments with YO annotation. Used in mansucript.
large-scale dataset (D. grimshawi male)	Dgri male thorax replicate 2 gene-level read counts based on HiSAT2 alignments and YO annotation	NCBI GEO; This paper	NCBI GEO GSM2113182:GSM2113182_dgriG1_m_tx_R2.htseq_reverse.HiSAT2.YO.txt.gz	Based on alignments with YO annotation. Used in mansucript.
large-scale dataset (D. grimshawi male)	Dgri male thorax replicate 3 gene-level read counts based on HiSAT2 alignments and YO annotation	NCBI GEO; This paper	NCBI GEO GSM2113183:GSM2113183_dgriG1_m_tx_R3.htseq_reverse.HiSAT2.YO.txt.gz	Based on alignments with YO annotation. Used in mansucript.
large-scale dataset (D. grimshawi male)	Dgri male thorax replicate 4 gene-level read counts based on HiSAT2 alignments and YO annotation	NCBI GEO; This paper	NCBI GEO GSM2113184:GSM2113184_dgriG1_m_tx_R4.htseq_reverse.HiSAT2.YO.txt.gz	Based on alignments with YO annotation. Used in mansucript.
large-scale dataset (D. grimshawi male)	Dgri male whole organism replicate 1 gene-level read counts based on HiSAT2 alignments and YO annotation	NCBI GEO; This paper	NCBI GEO GSM2113185:GSM2113185_dgriG1_m_wb_R1.htseq_reverse.HiSAT2.YO.txt.gz	Based on alignments with YO annotation. Used in mansucript.
large-scale dataset (D. grimshawi male)	Dgri male whole organism replicate 2 gene-level read counts based on HiSAT2 alignments and YO annotation	NCBI GEO; This paper	NCBI GEO GSM2113186:GSM2113186_dgriG1_m_wb_R2.htseq_reverse.HiSAT2.YO.txt.gz	Based on alignments with YO annotation. Used in mansucript.
large-scale dataset (D. grimshawi male)	Dgri male whole organism replicate 3 gene-level read counts based on HiSAT2 alignments and YO annotation	NCBI GEO; This paper	NCBI GEO GSM2113187:GSM2113187_dgriG1_m_wb_R3.htseq_reverse.HiSAT2.YO.txt.gz	Based on alignments with YO annotation. Used in mansucript.
large-scale dataset (D. grimshawi male)	Dgri male whole organism replicate 4 gene-level read counts based on HiSAT2 alignments and YO annotation	NCBI GEO; This paper	NCBI GEO GSM2113188:GSM2113188_dgriG1_m_wb_R4.htseq_reverse.HiSAT2.YO.txt.gz	Based on alignments with YO annotation. Used in mansucript.
large-scale dataset (D. mojavensis female)	Dmoj female abdomen replicate 1 gene-level read counts based on HiSAT2 alignments and YO annotation	NCBI GEO; This paper	NCBI GEO GSE99574:GSM2647002_dmoj_AC_f_r1.htseq_reverse.HiSAT2.YO.txt.gz	Based on alignments with YO annotation. Used in mansucript.
large-scale dataset (D. mojavensis female)	Dmoj female abdomen replicate 2 gene-level read counts based on HiSAT2 alignments and YO annotation	NCBI GEO; This paper	NCBI GEO GSE99574:GSM2647003_dmoj_AC_f_r2.htseq_reverse.HiSAT2.YO.txt.gz	Based on alignments with YO annotation. Used in mansucript.
large-scale dataset (D. mojavensis female)	Dmoj female abdomen replicate 3 gene-level read counts based on HiSAT2 alignments and YO annotation	NCBI GEO; This paper	NCBI GEO GSE99574:GSM2647004_dmoj_AC_f_r3.htseq_reverse.HiSAT2.YO.txt.gz	Based on alignments with YO annotation. Used in mansucript.
large-scale dataset (D. mojavensis female)	Dmoj female abdomen replicate 4 gene-level read counts based on HiSAT2 alignments and YO annotation	NCBI GEO; This paper	NCBI GEO GSE99574:GSM2817227_dmoj_AC_f_r4.htseq_reverse.HiSAT2.YO.txt.gz	Based on alignments with YO annotation. Used in mansucript.
large-scale dataset (D. mojavensis female)	Dmoj female viscera replicate 1 gene-level read counts based on HiSAT2 alignments and YO annotation	NCBI GEO; This paper	NCBI GEO GSE99574:GSM2647008_dmoj_DG_f_r1.htseq_reverse.HiSAT2.YO.txt.gz	Based on alignments with YO annotation. Used in mansucript.
large-scale dataset (D. mojavensis female)	Dmoj female viscera replicate 2 gene-level read counts based on HiSAT2 alignments and YO annotation	NCBI GEO; This paper	NCBI GEO GSE99574:GSM2647009_dmoj_DG_f_r2.htseq_reverse.HiSAT2.YO.txt.gz	Based on alignments with YO annotation. Used in mansucript.
large-scale dataset (D. mojavensis female)	Dmoj female viscera replicate 3 gene-level read counts based on HiSAT2 alignments and YO annotation	NCBI GEO; This paper	NCBI GEO GSE99574:GSM2647010_dmoj_DG_f_r3.htseq_reverse.HiSAT2.YO.txt.gz	Based on alignments with YO annotation. Used in mansucript.
large-scale dataset (D. mojavensis female)	Dmoj female viscera replicate 4 gene-level read counts based on HiSAT2 alignments and YO annotation	NCBI GEO; This paper	NCBI GEO GSE99574:GSM2817229_dmoj_DG_f_r4.htseq_reverse.HiSAT2.YO.txt.gz	Based on alignments with YO annotation. Used in mansucript.
large-scale dataset (D. mojavensis female)	Dmoj female gonad replicate 1 gene-level read counts based on HiSAT2 alignments and YO annotation	NCBI GEO; This paper	NCBI GEO GSE99574:GSM2647014_dmoj_GO_f_r1.htseq_reverse.HiSAT2.YO.txt.gz	Based on alignments with YO annotation. Used in mansucript.
large-scale dataset (D. mojavensis female)	Dmoj female gonad replicate 2 gene-level read counts based on HiSAT2 alignments and YO annotation	NCBI GEO; This paper	NCBI GEO GSE99574:GSM2647015_dmoj_GO_f_r2.htseq_reverse.HiSAT2.YO.txt.gz	Based on alignments with YO annotation. Used in mansucript.
large-scale dataset (D. mojavensis female)	Dmoj female gonad replicate 3 gene-level read counts based on HiSAT2 alignments and YO annotation	NCBI GEO; This paper	NCBI GEO GSE99574:GSM2647016_dmoj_GO_f_r3.htseq_reverse.HiSAT2.YO.txt.gz	Based on alignments with YO annotation. Used in mansucript.
large-scale dataset (D. mojavensis female)	Dmoj female gonad replicate 4 gene-level read counts based on HiSAT2 alignments and YO annotation	NCBI GEO; This paper	NCBI GEO GSE99574:GSM2817231_dmoj_GO_f_r4.htseq_reverse.HiSAT2.YO.txt.gz	Based on alignments with YO annotation. Used in mansucript.
large-scale dataset (D. mojavensis female)	Dmoj female head replicate 1 gene-level read counts based on HiSAT2 alignments and YO annotation	NCBI GEO; This paper	NCBI GEO GSE99574:GSM2647020_dmoj_HD_f_r1.htseq_reverse.HiSAT2.YO.txt.gz	Based on alignments with YO annotation. Used in mansucript.
large-scale dataset (D. mojavensis female)	Dmoj female head replicate 2 gene-level read counts based on HiSAT2 alignments and YO annotation	NCBI GEO; This paper	NCBI GEO GSE99574:GSM2647021_dmoj_HD_f_r2.htseq_reverse.HiSAT2.YO.txt.gz	Based on alignments with YO annotation. Used in mansucript.
large-scale dataset (D. mojavensis female)	Dmoj female head replicate 3 gene-level read counts based on HiSAT2 alignments and YO annotation	NCBI GEO; This paper	NCBI GEO GSE99574:GSM2647022_dmoj_HD_f_r3.htseq_reverse.HiSAT2.YO.txt.gz	Based on alignments with YO annotation. Used in mansucript.
large-scale dataset (D. mojavensis female)	Dmoj female head replicate 4 gene-level read counts based on HiSAT2 alignments and YO annotation	NCBI GEO; This paper	NCBI GEO GSE99574:GSM2817233_dmoj_HD_f_r4.htseq_reverse.HiSAT2.YO.txt.gz	Based on alignments with YO annotation. Used in mansucript.
large-scale dataset (D. mojavensis female)	Dmoj female reproductive tract replicate 1 gene-level read counts based on HiSAT2 alignments and YO annotation	NCBI GEO; This paper	NCBI GEO GSE99574:GSM2647026_dmoj_RE_f_r1.htseq_reverse.HiSAT2.YO.txt.gz	Based on alignments with YO annotation. Used in mansucript.
large-scale dataset (D. mojavensis female)	Dmoj female reproductive tract replicate 2 gene-level read counts based on HiSAT2 alignments and YO annotation	NCBI GEO; This paper	NCBI GEO GSE99574:GSM2647027_dmoj_RE_f_r2.htseq_reverse.HiSAT2.YO.txt.gz	Based on alignments with YO annotation. Used in mansucript.
large-scale dataset (D. mojavensis female)	Dmoj female reproductive tract replicate 3 gene-level read counts based on HiSAT2 alignments and YO annotation	NCBI GEO; This paper	NCBI GEO GSE99574:GSM2647028_dmoj_RE_f_r3.htseq_reverse.HiSAT2.YO.txt.gz	Based on alignments with YO annotation. Used in mansucript.
large-scale dataset (D. mojavensis female)	Dmoj female reproductive tract replicate 4 gene-level read counts based on HiSAT2 alignments and YO annotation	NCBI GEO; This paper	NCBI GEO GSE99574:GSM2817235_dmoj_RE_f_r4.htseq_reverse.HiSAT2.YO.txt.gz	Based on alignments with YO annotation. Used in mansucript.
large-scale dataset (D. mojavensis female)	Dmoj female thorax replicate 1 gene-level read counts based on HiSAT2 alignments and YO annotation	NCBI GEO; This paper	NCBI GEO GSE99574:GSM2647032_dmoj_TX_f_r1.htseq_reverse.HiSAT2.YO.txt.gz	Based on alignments with YO annotation. Used in mansucript.
large-scale dataset (D. mojavensis female)	Dmoj female thorax replicate 2 gene-level read counts based on HiSAT2 alignments and YO annotation	NCBI GEO; This paper	NCBI GEO GSE99574:GSM2647033_dmoj_TX_f_r2.htseq_reverse.HiSAT2.YO.txt.gz	Based on alignments with YO annotation. Used in mansucript.
large-scale dataset (D. mojavensis female)	Dmoj female thorax replicate 3 gene-level read counts based on HiSAT2 alignments and YO annotation	NCBI GEO; This paper	NCBI GEO GSE99574:GSM2647034_dmoj_TX_f_r3.htseq_reverse.HiSAT2.YO.txt.gz	Based on alignments with YO annotation. Used in mansucript.
large-scale dataset (D. mojavensis female)	Dmoj female thorax replicate 4 gene-level read counts based on HiSAT2 alignments and YO annotation	NCBI GEO; This paper	NCBI GEO GSE99574:GSM2817237_dmoj_TX_f_r4.htseq_reverse.HiSAT2.YO.txt.gz	Based on alignments with YO annotation. Used in mansucript.
large-scale dataset (D. mojavensis female)	Dmoj female whole organism replicate 1 gene-level read counts based on HiSAT2 alignments and YO annotation	NCBI GEO; This paper	NCBI GEO GSE99574:GSM2647038_dmoj_WB_f_r1.htseq_reverse.HiSAT2.YO.txt.gz	Based on alignments with YO annotation. Used in mansucript.
large-scale dataset (D. mojavensis female)	Dmoj female whole organism replicate 2 gene-level read counts based on HiSAT2 alignments and YO annotation	NCBI GEO; This paper	NCBI GEO GSE99574:GSM2647039_dmoj_WB_f_r2.htseq_reverse.HiSAT2.YO.txt.gz	Based on alignments with YO annotation. Used in mansucript.
large-scale dataset (D. mojavensis female)	Dmoj female whole organism replicate 3 gene-level read counts based on HiSAT2 alignments and YO annotation	NCBI GEO; This paper	NCBI GEO GSE99574:GSM2647040_dmoj_WB_f_r3.htseq_reverse.HiSAT2.YO.txt.gz	Based on alignments with YO annotation. Used in mansucript.
large-scale dataset (D. mojavensis female)	Dmoj female whole organism replicate 4 gene-level read counts based on HiSAT2 alignments and YO annotation	NCBI GEO; This paper	NCBI GEO GSE99574:GSM2817239_dmoj_WB_f_r4.htseq_reverse.HiSAT2.YO.txt.gz	Based on alignments with YO annotation. Used in mansucript.
large-scale dataset (D. mojavensis male)	Dmoj male abdomen replicate 1 gene-level read counts based on HiSAT2 alignments and YO annotation	NCBI GEO; This paper	NCBI GEO GSE99574:GSM2647005_dmoj_AC_m_r1.htseq_reverse.HiSAT2.YO.txt.gz	Based on alignments with YO annotation. Used in mansucript.
large-scale dataset (D. mojavensis male)	Dmoj male abdomen replicate 2 gene-level read counts based on HiSAT2 alignments and YO annotation	NCBI GEO; This paper	NCBI GEO GSE99574:GSM2647006_dmoj_AC_m_r2.htseq_reverse.HiSAT2.YO.txt.gz	Based on alignments with YO annotation. Used in mansucript.
large-scale dataset (D. mojavensis male)	Dmoj male abdomen replicate 3 gene-level read counts based on HiSAT2 alignments and YO annotation	NCBI GEO; This paper	NCBI GEO GSE99574:GSM2647007_dmoj_AC_m_r3.htseq_reverse.HiSAT2.YO.txt.gz	Based on alignments with YO annotation. Used in mansucript.
large-scale dataset (D. mojavensis male)	Dmoj male abdomen replicate 4 gene-level read counts based on HiSAT2 alignments and YO annotation	NCBI GEO; This paper	NCBI GEO GSE99574:GSM2817228_dmoj_AC_m_r4.htseq_reverse.HiSAT2.YO.txt.gz	Based on alignments with YO annotation. Used in mansucript.
large-scale dataset (D. mojavensis male)	Dmoj male viscera replicate 1 gene-level read counts based on HiSAT2 alignments and YO annotation	NCBI GEO; This paper	NCBI GEO GSE99574:GSM2647011_dmoj_DG_m_r1.htseq_reverse.HiSAT2.YO.txt.gz	Based on alignments with YO annotation. Used in mansucript.
large-scale dataset (D. mojavensis male)	Dmoj male viscera replicate 2 gene-level read counts based on HiSAT2 alignments and YO annotation	NCBI GEO; This paper	NCBI GEO GSE99574:GSM2647012_dmoj_DG_m_r2.htseq_reverse.HiSAT2.YO.txt.gz	Based on alignments with YO annotation. Used in mansucript.
large-scale dataset (D. mojavensis male)	Dmoj male viscera replicate 3 gene-level read counts based on HiSAT2 alignments and YO annotation	NCBI GEO; This paper	NCBI GEO GSE99574:GSM2647013_dmoj_DG_m_r3.htseq_reverse.HiSAT2.YO.txt.gz	Based on alignments with YO annotation. Used in mansucript.
large-scale dataset (D. mojavensis male)	Dmoj male viscera replicate 4 gene-level read counts based on HiSAT2 alignments and YO annotation	NCBI GEO; This paper	NCBI GEO GSE99574:GSM2817230_dmoj_DG_m_r4.htseq_reverse.HiSAT2.YO.txt.gz	Based on alignments with YO annotation. Used in mansucript.
large-scale dataset (D. mojavensis male)	Dmoj male gonad replicate 1 gene-level read counts based on HiSAT2 alignments and YO annotation	NCBI GEO; This paper	NCBI GEO GSE99574:GSM2647017_dmoj_GO_m_r1.htseq_reverse.HiSAT2.YO.txt.gz	Based on alignments with YO annotation. Used in mansucript.
large-scale dataset (D. mojavensis male)	Dmoj male gonad replicate 2 gene-level read counts based on HiSAT2 alignments and YO annotation	NCBI GEO; This paper	NCBI GEO GSE99574:GSM2647018_dmoj_GO_m_r2.htseq_reverse.HiSAT2.YO.txt.gz	Based on alignments with YO annotation. Used in mansucript.
large-scale dataset (D. mojavensis male)	Dmoj male gonad replicate 3 gene-level read counts based on HiSAT2 alignments and YO annotation	NCBI GEO; This paper	NCBI GEO GSE99574:GSM2647019_dmoj_GO_m_r3.htseq_reverse.HiSAT2.YO.txt.gz	Based on alignments with YO annotation. Used in mansucript.
large-scale dataset (D. mojavensis male)	Dmoj male gonad replicate 4 gene-level read counts based on HiSAT2 alignments and YO annotation	NCBI GEO; This paper	NCBI GEO GSE99574:GSM2817232_dmoj_GO_m_r4.htseq_reverse.HiSAT2.YO.txt.gz	Based on alignments with YO annotation. Used in mansucript.
large-scale dataset (D. mojavensis male)	Dmoj male head replicate 1 gene-level read counts based on HiSAT2 alignments and YO annotation	NCBI GEO; This paper	NCBI GEO GSE99574:GSM2647023_dmoj_HD_m_r1.htseq_reverse.HiSAT2.YO.txt.gz	Based on alignments with YO annotation. Used in mansucript.
large-scale dataset (D. mojavensis male)	Dmoj male head replicate 2 gene-level read counts based on HiSAT2 alignments and YO annotation	NCBI GEO; This paper	NCBI GEO GSE99574:GSM2647024_dmoj_HD_m_r2.htseq_reverse.HiSAT2.YO.txt.gz	Based on alignments with YO annotation. Used in mansucript.
large-scale dataset (D. mojavensis male)	Dmoj male head replicate 3 gene-level read counts based on HiSAT2 alignments and YO annotation	NCBI GEO; This paper	NCBI GEO GSE99574:GSM2647025_dmoj_HD_m_r3.htseq_reverse.HiSAT2.YO.txt.gz	Based on alignments with YO annotation. Used in mansucript.
large-scale dataset (D. mojavensis male)	Dmoj male head replicate 4 gene-level read counts based on HiSAT2 alignments and YO annotation	NCBI GEO; This paper	NCBI GEO GSE99574:GSM2817234_dmoj_HD_m_r4.htseq_reverse.HiSAT2.YO.txt.gz	Based on alignments with YO annotation. Used in mansucript.
large-scale dataset (D. mojavensis male)	Dmoj male reproductive tract replicate 1 gene-level read counts based on HiSAT2 alignments and YO annotation	NCBI GEO; This paper	NCBI GEO GSE99574:GSM2647029_dmoj_RE_m_r1.htseq_reverse.HiSAT2.YO.txt.gz	Based on alignments with YO annotation. Used in mansucript.
large-scale dataset (D. mojavensis male)	Dmoj male reproductive tract replicate 2 gene-level read counts based on HiSAT2 alignments and YO annotation	NCBI GEO; This paper	NCBI GEO GSE99574:GSM2647030_dmoj_RE_m_r2.htseq_reverse.HiSAT2.YO.txt.gz	Based on alignments with YO annotation. Used in mansucript.
large-scale dataset (D. mojavensis male)	Dmoj male reproductive tract replicate 3 gene-level read counts based on HiSAT2 alignments and YO annotation	NCBI GEO; This paper	NCBI GEO GSE99574:GSM2647031_dmoj_RE_m_r3.htseq_reverse.HiSAT2.YO.txt.gz	Based on alignments with YO annotation. Used in mansucript.
large-scale dataset (D. mojavensis male)	Dmoj male reproductive tract replicate 4 gene-level read counts based on HiSAT2 alignments and YO annotation	NCBI GEO; This paper	NCBI GEO GSE99574:GSM2817236_dmoj_RE_m_r4.htseq_reverse.HiSAT2.YO.txt.gz	Based on alignments with YO annotation. Used in mansucript.
large-scale dataset (D. mojavensis male)	Dmoj male thorax replicate 1 gene-level read counts based on HiSAT2 alignments and YO annotation	NCBI GEO; This paper	NCBI GEO GSE99574:GSM2647035_dmoj_TX_m_r1.htseq_reverse.HiSAT2.YO.txt.gz	Based on alignments with YO annotation. Used in mansucript.
large-scale dataset (D. mojavensis male)	Dmoj male thorax replicate 2 gene-level read counts based on HiSAT2 alignments and YO annotation	NCBI GEO; This paper	NCBI GEO GSE99574:GSM2647036_dmoj_TX_m_r2.htseq_reverse.HiSAT2.YO.txt.gz	Based on alignments with YO annotation. Used in mansucript.
large-scale dataset (D. mojavensis male)	Dmoj male thorax replicate 3 gene-level read counts based on HiSAT2 alignments and YO annotation	NCBI GEO; This paper	NCBI GEO GSE99574:GSM2647037_dmoj_TX_m_r3.htseq_reverse.HiSAT2.YO.txt.gz	Based on alignments with YO annotation. Used in mansucript.
large-scale dataset (D. mojavensis male)	Dmoj male thorax replicate 4 gene-level read counts based on HiSAT2 alignments and YO annotation	NCBI GEO; This paper	NCBI GEO GSE99574:GSM2817238_dmoj_TX_m_r4.htseq_reverse.HiSAT2.YO.txt.gz	Based on alignments with YO annotation. Used in mansucript.
large-scale dataset (D. mojavensis male)	Dmoj male whole organism replicate 1 gene-level read counts based on HiSAT2 alignments and YO annotation	NCBI GEO; This paper	NCBI GEO GSE99574:GSM2647041_dmoj_WB_m_r1.htseq_reverse.HiSAT2.YO.txt.gz	Based on alignments with YO annotation. Used in mansucript.
large-scale dataset (D. mojavensis male)	Dmoj male whole organism replicate 2 gene-level read counts based on HiSAT2 alignments and YO annotation	NCBI GEO; This paper	NCBI GEO GSE99574:GSM2647042_dmoj_WB_m_r2.htseq_reverse.HiSAT2.YO.txt.gz	Based on alignments with YO annotation. Used in mansucript.
large-scale dataset (D. mojavensis male)	Dmoj male whole organism replicate 3 gene-level read counts based on HiSAT2 alignments and YO annotation	NCBI GEO; This paper	NCBI GEO GSE99574:GSM2647043_dmoj_WB_m_r3.htseq_reverse.HiSAT2.YO.txt.gz	Based on alignments with YO annotation. Used in mansucript.
large-scale dataset (D. mojavensis male)	Dmoj male whole organism replicate 4 gene-level read counts based on HiSAT2 alignments and YO annotation	NCBI GEO; This paper	NCBI GEO GSE99574:GSM2817240_dmoj_WB_m_r4.htseq_reverse.HiSAT2.YO.txt.gz	Based on alignments with YO annotation. Used in mansucript.
large-scale dataset (D. mojavensis male)	Dper female abdomen replicate 1 gene-level read counts based on HiSAT2 alignments and YO annotation	NCBI GEO; This paper	NCBI GEO GSE99574:GSM2647044_dper_AC_f_r1.htseq_reverse.HiSAT2.YO.txt.gz	Based on alignments with YO annotation. Used in mansucript.
large-scale dataset (D. mojavensis male)	Dper female abdomen replicate 2 gene-level read counts based on HiSAT2 alignments and YO annotation	NCBI GEO; This paper	NCBI GEO GSE99574:GSM2647045_dper_AC_f_r2.htseq_reverse.HiSAT2.YO.txt.gz	Based on alignments with YO annotation. Used in mansucript.
large-scale dataset (D. persimilis female)	Dper female abdomen replicate 3 gene-level read counts based on HiSAT2 alignments and YO annotation	NCBI GEO; This paper	NCBI GEO GSE99574:GSM2647046_dper_AC_f_r3.htseq_reverse.HiSAT2.YO.txt.gz	Based on alignments with YO annotation. Used in mansucript.
large-scale dataset (D. persimilis female)	Dper female abdomen replicate 4 gene-level read counts based on HiSAT2 alignments and YO annotation	NCBI GEO; This paper	NCBI GEO GSE99574:GSM2817241_dper_AC_f_r4.htseq_reverse.HiSAT2.YO.txt.gz	Based on alignments with YO annotation. Used in mansucript.
large-scale dataset (D. persimilis female)	Dper female viscera replicate 1 gene-level read counts based on HiSAT2 alignments and YO annotation	NCBI GEO; This paper	NCBI GEO GSE99574:GSM2647050_dper_DG_f_r1.htseq_reverse.HiSAT2.YO.txt.gz	Based on alignments with YO annotation. Used in mansucript.
large-scale dataset (D. persimilis female)	Dper female viscera replicate 2 gene-level read counts based on HiSAT2 alignments and YO annotation	NCBI GEO; This paper	NCBI GEO GSE99574:GSM2647051_dper_DG_f_r2.htseq_reverse.HiSAT2.YO.txt.gz	Based on alignments with YO annotation. Used in mansucript.
large-scale dataset (D. persimilis female)	Dper female viscera replicate 3 gene-level read counts based on HiSAT2 alignments and YO annotation	NCBI GEO; This paper	NCBI GEO GSE99574:GSM2647052_dper_DG_f_r3.htseq_reverse.HiSAT2.YO.txt.gz	Based on alignments with YO annotation. Used in mansucript.
large-scale dataset (D. persimilis female)	Dper female viscera replicate 4 gene-level read counts based on HiSAT2 alignments and YO annotation	NCBI GEO; This paper	NCBI GEO GSE99574:GSM2817243_dper_DG_f_r4.htseq_reverse.HiSAT2.YO.txt.gz	Based on alignments with YO annotation. Used in mansucript.
large-scale dataset (D. persimilis female)	Dper female gonad replicate 1 gene-level read counts based on HiSAT2 alignments and YO annotation	NCBI GEO; This paper	NCBI GEO GSE99574:GSM2647056_dper_GO_f_r1.htseq_reverse.HiSAT2.YO.txt.gz	Based on alignments with YO annotation. Used in mansucript.
large-scale dataset (D. persimilis female)	Dper female gonad replicate 2 gene-level read counts based on HiSAT2 alignments and YO annotation	NCBI GEO; This paper	NCBI GEO GSE99574:GSM2647057_dper_GO_f_r2.htseq_reverse.HiSAT2.YO.txt.gz	Based on alignments with YO annotation. Used in mansucript.
large-scale dataset (D. persimilis female)	Dper female gonad replicate 3 gene-level read counts based on HiSAT2 alignments and YO annotation	NCBI GEO; This paper	NCBI GEO GSE99574:GSM2647058_dper_GO_f_r3.htseq_reverse.HiSAT2.YO.txt.gz	Based on alignments with YO annotation. Used in mansucript.
large-scale dataset (D. persimilis female)	Dper female gonad replicate 4 gene-level read counts based on HiSAT2 alignments and YO annotation	NCBI GEO; This paper	NCBI GEO GSE99574:GSM2817245_dper_GO_f_r4.htseq_reverse.HiSAT2.YO.txt.gz	Based on alignments with YO annotation. Used in mansucript.
large-scale dataset (D. persimilis female)	Dper female head replicate 1 gene-level read counts based on HiSAT2 alignments and YO annotation	NCBI GEO; This paper	NCBI GEO GSE99574:GSM2647062_dper_HD_f_r1.htseq_reverse.HiSAT2.YO.txt.gz	Based on alignments with YO annotation. Used in mansucript.
large-scale dataset (D. persimilis female)	Dper female head replicate 2 gene-level read counts based on HiSAT2 alignments and YO annotation	NCBI GEO; This paper	NCBI GEO GSE99574:GSM2647063_dper_HD_f_r2.htseq_reverse.HiSAT2.YO.txt.gz	Based on alignments with YO annotation. Used in mansucript.
large-scale dataset (D. persimilis female)	Dper female head replicate 3 gene-level read counts based on HiSAT2 alignments and YO annotation	NCBI GEO; This paper	NCBI GEO GSE99574:GSM2647064_dper_HD_f_r3.htseq_reverse.HiSAT2.YO.txt.gz	Based on alignments with YO annotation. Used in mansucript.
large-scale dataset (D. persimilis female)	Dper female head replicate 4 gene-level read counts based on HiSAT2 alignments and YO annotation	NCBI GEO; This paper	NCBI GEO GSE99574:GSM2817247_dper_HD_f_r4.htseq_reverse.HiSAT2.YO.txt.gz	Based on alignments with YO annotation. Used in mansucript.
large-scale dataset (D. persimilis female)	Dper female reproductive tract replicate 1 gene-level read counts based on HiSAT2 alignments and YO annotation	NCBI GEO; This paper	NCBI GEO GSE99574:GSM2647068_dper_RE_f_r1.htseq_reverse.HiSAT2.YO.txt.gz	Based on alignments with YO annotation. Used in mansucript.
large-scale dataset (D. persimilis female)	Dper female reproductive tract replicate 2 gene-level read counts based on HiSAT2 alignments and YO annotation	NCBI GEO; This paper	NCBI GEO GSE99574:GSM2647069_dper_RE_f_r2.htseq_reverse.HiSAT2.YO.txt.gz	Based on alignments with YO annotation. Used in mansucript.
large-scale dataset (D. persimilis female)	Dper female reproductive tract replicate 3 gene-level read counts based on HiSAT2 alignments and YO annotation	NCBI GEO; This paper	NCBI GEO GSE99574:GSM2647070_dper_RE_f_r3.htseq_reverse.HiSAT2.YO.txt.gz	Based on alignments with YO annotation. Used in mansucript.
large-scale dataset (D. persimilis female)	Dper female reproductive tract replicate 4 gene-level read counts based on HiSAT2 alignments and YO annotation	NCBI GEO; This paper	NCBI GEO GSE99574:GSM2817249_dper_RE_f_r4.htseq_reverse.HiSAT2.YO.txt.gz	Based on alignments with YO annotation. Used in mansucript.
large-scale dataset (D. persimilis female)	Dper female thorax replicate 1 gene-level read counts based on HiSAT2 alignments and YO annotation	NCBI GEO; This paper	NCBI GEO GSE99574:GSM2647074_dper_TX_f_r1.htseq_reverse.HiSAT2.YO.txt.gz	Based on alignments with YO annotation. Used in mansucript.
large-scale dataset (D. persimilis female)	Dper female thorax replicate 2 gene-level read counts based on HiSAT2 alignments and YO annotation	NCBI GEO; This paper	NCBI GEO GSE99574:GSM2647075_dper_TX_f_r2.htseq_reverse.HiSAT2.YO.txt.gz	Based on alignments with YO annotation. Used in mansucript.
large-scale dataset (D. persimilis female)	Dper female thorax replicate 3 gene-level read counts based on HiSAT2 alignments and YO annotation	NCBI GEO; This paper	NCBI GEO GSE99574:GSM2647076_dper_TX_f_r3.htseq_reverse.HiSAT2.YO.txt.gz	Based on alignments with YO annotation. Used in mansucript.
large-scale dataset (D. persimilis female)	Dper female thorax replicate 4 gene-level read counts based on HiSAT2 alignments and YO annotation	NCBI GEO; This paper	NCBI GEO GSE99574:GSM2817251_dper_TX_f_r4.htseq_reverse.HiSAT2.YO.txt.gz	Based on alignments with YO annotation. Used in mansucript.
large-scale dataset (D. persimilis female)	Dper female whole organism replicate 1 gene-level read counts based on HiSAT2 alignments and YO annotation	NCBI GEO; This paper	NCBI GEO GSE99574:GSM2647080_dper_WB_f_r1.htseq_reverse.HiSAT2.YO.txt.gz	Based on alignments with YO annotation. Used in mansucript.
large-scale dataset (D. persimilis female)	Dper female whole organism replicate 2 gene-level read counts based on HiSAT2 alignments and YO annotation	NCBI GEO; This paper	NCBI GEO GSE99574:GSM2647081_dper_WB_f_r2.htseq_reverse.HiSAT2.YO.txt.gz	Based on alignments with YO annotation. Used in mansucript.
large-scale dataset (D. persimilis female)	Dper female whole organism replicate 3 gene-level read counts based on HiSAT2 alignments and YO annotation	NCBI GEO; This paper	NCBI GEO GSE99574:GSM2647082_dper_WB_f_r3.htseq_reverse.HiSAT2.YO.txt.gz	Based on alignments with YO annotation. Used in mansucript.
large-scale dataset (D. persimilis female)	Dper female whole organism replicate 4 gene-level read counts based on HiSAT2 alignments and YO annotation	NCBI GEO; This paper	NCBI GEO GSE99574:GSM2817253_dper_WB_f_r4.htseq_reverse.HiSAT2.YO.txt.gz	Based on alignments with YO annotation. Used in mansucript.
large-scale dataset (D. persimilis female)	Dper male abdomen replicate 1 gene-level read counts based on HiSAT2 alignments and YO annotation	NCBI GEO; This paper	NCBI GEO GSE99574:GSM2647047_dper_AC_m_r1.htseq_reverse.HiSAT2.YO.txt.gz	Based on alignments with YO annotation. Used in mansucript.
large-scale dataset (D. persimilis female)	Dper male abdomen replicate 2 gene-level read counts based on HiSAT2 alignments and YO annotation	NCBI GEO; This paper	NCBI GEO GSE99574:GSM2647048_dper_AC_m_r2.htseq_reverse.HiSAT2.YO.txt.gz	Based on alignments with YO annotation. Used in mansucript.
large-scale dataset (D. persimilis male)	Dper male abdomen replicate 3 gene-level read counts based on HiSAT2 alignments and YO annotation	NCBI GEO; This paper	NCBI GEO GSE99574:GSM2647049_dper_AC_m_r3.htseq_reverse.HiSAT2.YO.txt.gz	Based on alignments with YO annotation. Used in mansucript.
large-scale dataset (D. persimilis male)	Dper male abdomen replicate 4 gene-level read counts based on HiSAT2 alignments and YO annotation	NCBI GEO; This paper	NCBI GEO GSE99574:GSM2817242_dper_AC_m_r4.htseq_reverse.HiSAT2.YO.txt.gz	Based on alignments with YO annotation. Used in mansucript.
large-scale dataset (D. persimilis male)	Dper male viscera replicate 1 gene-level read counts based on HiSAT2 alignments and YO annotation	NCBI GEO; This paper	NCBI GEO GSE99574:GSM2647053_dper_DG_m_r1.htseq_reverse.HiSAT2.YO.txt.gz	Based on alignments with YO annotation. Used in mansucript.
large-scale dataset (D. persimilis male)	Dper male viscera replicate 2 gene-level read counts based on HiSAT2 alignments and YO annotation	NCBI GEO; This paper	NCBI GEO GSE99574:GSM2647054_dper_DG_m_r2.htseq_reverse.HiSAT2.YO.txt.gz	Based on alignments with YO annotation. Used in mansucript.
large-scale dataset (D. persimilis male)	Dper male viscera replicate 3 gene-level read counts based on HiSAT2 alignments and YO annotation	NCBI GEO; This paper	NCBI GEO GSE99574:GSM2647055_dper_DG_m_r3.htseq_reverse.HiSAT2.YO.txt.gz	Based on alignments with YO annotation. Used in mansucript.
large-scale dataset (D. persimilis male)	Dper male viscera replicate 4 gene-level read counts based on HiSAT2 alignments and YO annotation	NCBI GEO; This paper	NCBI GEO GSE99574:GSM2817244_dper_DG_m_r4.htseq_reverse.HiSAT2.YO.txt.gz	Based on alignments with YO annotation. Used in mansucript.
large-scale dataset (D. persimilis male)	Dper male gonad replicate 1 gene-level read counts based on HiSAT2 alignments and YO annotation	NCBI GEO; This paper	NCBI GEO GSE99574:GSM2647059_dper_GO_m_r1.htseq_reverse.HiSAT2.YO.txt.gz	Based on alignments with YO annotation. Used in mansucript.
large-scale dataset (D. persimilis male)	Dper male gonad replicate 2 gene-level read counts based on HiSAT2 alignments and YO annotation	NCBI GEO; This paper	NCBI GEO GSE99574:GSM2647060_dper_GO_m_r2.htseq_reverse.HiSAT2.YO.txt.gz	Based on alignments with YO annotation. Used in mansucript.
large-scale dataset (D. persimilis male)	Dper male gonad replicate 3 gene-level read counts based on HiSAT2 alignments and YO annotation	NCBI GEO; This paper	NCBI GEO GSE99574:GSM2647061_dper_GO_m_r3.htseq_reverse.HiSAT2.YO.txt.gz	Based on alignments with YO annotation. Used in mansucript.
large-scale dataset (D. persimilis male)	Dper male gonad replicate 4 gene-level read counts based on HiSAT2 alignments and YO annotation	NCBI GEO; This paper	NCBI GEO GSE99574:GSM2817246_dper_GO_m_r4.htseq_reverse.HiSAT2.YO.txt.gz	Based on alignments with YO annotation. Used in mansucript.
large-scale dataset (D. persimilis male)	Dper male head replicate 1 gene-level read counts based on HiSAT2 alignments and YO annotation	NCBI GEO; This paper	NCBI GEO GSE99574:GSM2647065_dper_HD_m_r1.htseq_reverse.HiSAT2.YO.txt.gz	Based on alignments with YO annotation. Used in mansucript.
large-scale dataset (D. persimilis male)	Dper male head replicate 2 gene-level read counts based on HiSAT2 alignments and YO annotation	NCBI GEO; This paper	NCBI GEO GSE99574:GSM2647066_dper_HD_m_r2.htseq_reverse.HiSAT2.YO.txt.gz	Based on alignments with YO annotation. Used in mansucript.
large-scale dataset (D. persimilis male)	Dper male head replicate 3 gene-level read counts based on HiSAT2 alignments and YO annotation	NCBI GEO; This paper	NCBI GEO GSE99574:GSM2647067_dper_HD_m_r3.htseq_reverse.HiSAT2.YO.txt.gz	Based on alignments with YO annotation. Used in mansucript.
large-scale dataset (D. persimilis male)	Dper male head replicate 4 gene-level read counts based on HiSAT2 alignments and YO annotation	NCBI GEO; This paper	NCBI GEO GSE99574:GSM2817248_dper_HD_m_r4.htseq_reverse.HiSAT2.YO.txt.gz	Based on alignments with YO annotation. Used in mansucript.
large-scale dataset (D. persimilis male)	Dper male reproductive tract replicate 1 gene-level read counts based on HiSAT2 alignments and YO annotation	NCBI GEO; This paper	NCBI GEO GSE99574:GSM2647071_dper_RE_m_r1.htseq_reverse.HiSAT2.YO.txt.gz	Based on alignments with YO annotation. Used in mansucript.
large-scale dataset (D. persimilis male)	Dper male reproductive tract replicate 2 gene-level read counts based on HiSAT2 alignments and YO annotation	NCBI GEO; This paper	NCBI GEO GSE99574:GSM2647072_dper_RE_m_r2.htseq_reverse.HiSAT2.YO.txt.gz	Based on alignments with YO annotation. Used in mansucript.
large-scale dataset (D. persimilis male)	Dper male reproductive tract replicate 3 gene-level read counts based on HiSAT2 alignments and YO annotation	NCBI GEO; This paper	NCBI GEO GSE99574:GSM2647073_dper_RE_m_r3.htseq_reverse.HiSAT2.YO.txt.gz	Based on alignments with YO annotation. Used in mansucript.
large-scale dataset (D. persimilis male)	Dper male reproductive tract replicate 4 gene-level read counts based on HiSAT2 alignments and YO annotation	NCBI GEO; This paper	NCBI GEO GSE99574:GSM2817250_dper_RE_m_r4.htseq_reverse.HiSAT2.YO.txt.gz	Based on alignments with YO annotation. Used in mansucript.
large-scale dataset (D. persimilis male)	Dper male thorax replicate 1 gene-level read counts based on HiSAT2 alignments and YO annotation	NCBI GEO; This paper	NCBI GEO GSE99574:GSM2647077_dper_TX_m_r1.htseq_reverse.HiSAT2.YO.txt.gz	Based on alignments with YO annotation. Used in mansucript.
large-scale dataset (D. persimilis male)	Dper male thorax replicate 2 gene-level read counts based on HiSAT2 alignments and YO annotation	NCBI GEO; This paper	NCBI GEO GSE99574:GSM2647078_dper_TX_m_r2.htseq_reverse.HiSAT2.YO.txt.gz	Based on alignments with YO annotation. Used in mansucript.
large-scale dataset (D. persimilis male)	Dper male thorax replicate 3 gene-level read counts based on HiSAT2 alignments and YO annotation	NCBI GEO; This paper	NCBI GEO GSE99574:GSM2647079_dper_TX_m_r3.htseq_reverse.HiSAT2.YO.txt.gz	Based on alignments with YO annotation. Used in mansucript.
large-scale dataset (D. persimilis male)	Dper male thorax replicate 4 gene-level read counts based on HiSAT2 alignments and YO annotation	NCBI GEO; This paper	NCBI GEO GSE99574:GSM2817252_dper_TX_m_r4.htseq_reverse.HiSAT2.YO.txt.gz	Based on alignments with YO annotation. Used in mansucript.
large-scale dataset (D. persimilis male)	Dper male whole organism replicate 1 gene-level read counts based on HiSAT2 alignments and YO annotation	NCBI GEO; This paper	NCBI GEO GSE99574:GSM2647083_dper_WB_m_r1.htseq_reverse.HiSAT2.YO.txt.gz	Based on alignments with YO annotation. Used in mansucript.
large-scale dataset (D. persimilis male)	Dper male whole organism replicate 2 gene-level read counts based on HiSAT2 alignments and YO annotation	NCBI GEO; This paper	NCBI GEO GSE99574:GSM2647084_dper_WB_m_r2.htseq_reverse.HiSAT2.YO.txt.gz	Based on alignments with YO annotation. Used in mansucript.
large-scale dataset (D. persimilis male)	Dper male whole organism replicate 3 gene-level read counts based on HiSAT2 alignments and YO annotation	NCBI GEO; This paper	NCBI GEO GSE99574:GSM2647085_dper_WB_m_r3.htseq_reverse.HiSAT2.YO.txt.gz	Based on alignments with YO annotation. Used in mansucript.
large-scale dataset (D. persimilis male)	Dper male whole organism replicate 4 gene-level read counts based on HiSAT2 alignments and YO annotation	NCBI GEO; This paper	NCBI GEO GSE99574:GSM2817254_dper_WB_m_r4.htseq_reverse.HiSAT2.YO.txt.gz	Based on alignments with YO annotation. Used in mansucript.
large-scale dataset (D. persimilis male)	Dpse female abdomen replicate 1 gene-level read counts based on HiSAT2 alignments and YO annotation	NCBI GEO; This paper	NCBI GEO GSE99574:GSM2647086_dpse_AC_f_r1.htseq_reverse.HiSAT2.YO.txt.gz	Based on alignments with YO annotation. Used in mansucript.
large-scale dataset (D. persimilis male)	Dpse female abdomen replicate 2 gene-level read counts based on HiSAT2 alignments and YO annotation	NCBI GEO; This paper	NCBI GEO GSE99574:GSM2647087_dpse_AC_f_r2.htseq_reverse.HiSAT2.YO.txt.gz	Based on alignments with YO annotation. Used in mansucript.
large-scale dataset (D. persimilis male)	Dpse female abdomen replicate 3 gene-level read counts based on HiSAT2 alignments and YO annotation	NCBI GEO; This paper	NCBI GEO GSE99574:GSM2647088_dpse_AC_f_r3.htseq_reverse.HiSAT2.YO.txt.gz	Based on alignments with YO annotation. Used in mansucript.
large-scale dataset (D. persimilis male)	Dpse female abdomen replicate 4 gene-level read counts based on HiSAT2 alignments and YO annotation	NCBI GEO; This paper	NCBI GEO GSE99574:GSM2817255_dpse_AC_f_r4.htseq_reverse.HiSAT2.YO.txt.gz	Based on alignments with YO annotation. Used in mansucript.
large-scale dataset (D. pseudoobscura female)	Dpse female viscera replicate 1 gene-level read counts based on HiSAT2 alignments and YO annotation	NCBI GEO; This paper	NCBI GEO GSE99574:GSM2647092_dpse_DG_f_r1.htseq_reverse.HiSAT2.YO.txt.gz	Based on alignments with YO annotation. Used in mansucript.
large-scale dataset (D. pseudoobscura female)	Dpse female viscera replicate 2 gene-level read counts based on HiSAT2 alignments and YO annotation	NCBI GEO; This paper	NCBI GEO GSE99574:GSM2647093_dpse_DG_f_r2.htseq_reverse.HiSAT2.YO.txt.gz	Based on alignments with YO annotation. Used in mansucript.
large-scale dataset (D. pseudoobscura female)	Dpse female viscera replicate 3 gene-level read counts based on HiSAT2 alignments and YO annotation	NCBI GEO; This paper	NCBI GEO GSE99574:GSM2647094_dpse_DG_f_r3.htseq_reverse.HiSAT2.YO.txt.gz	Based on alignments with YO annotation. Used in mansucript.
large-scale dataset (D. pseudoobscura female)	Dpse female viscera replicate 4 gene-level read counts based on HiSAT2 alignments and YO annotation	NCBI GEO; This paper	NCBI GEO GSE99574:GSM2817257_dpse_DG_f_r4.htseq_reverse.HiSAT2.YO.txt.gz	Based on alignments with YO annotation. Used in mansucript.
large-scale dataset (D. pseudoobscura female)	Dpse female gonad replicate 1 gene-level read counts based on HiSAT2 alignments and YO annotation	NCBI GEO; This paper	NCBI GEO GSE99574:GSM2647098_dpse_GO_f_r1.htseq_reverse.HiSAT2.YO.txt.gz	Based on alignments with YO annotation. Used in mansucript.
large-scale dataset (D. pseudoobscura female)	Dpse female gonad replicate 2 gene-level read counts based on HiSAT2 alignments and YO annotation	NCBI GEO; This paper	NCBI GEO GSE99574:GSM2647099_dpse_GO_f_r2.htseq_reverse.HiSAT2.YO.txt.gz	Based on alignments with YO annotation. Used in mansucript.
large-scale dataset (D. pseudoobscura female)	Dpse female gonad replicate 3 gene-level read counts based on HiSAT2 alignments and YO annotation	NCBI GEO; This paper	NCBI GEO GSE99574:GSM2647100_dpse_GO_f_r3.htseq_reverse.HiSAT2.YO.txt.gz	Based on alignments with YO annotation. Used in mansucript.
large-scale dataset (D. pseudoobscura female)	Dpse female gonad replicate 4 gene-level read counts based on HiSAT2 alignments and YO annotation	NCBI GEO; This paper	NCBI GEO GSE99574:GSM2817259_dpse_GO_f_r4.htseq_reverse.HiSAT2.YO.txt.gz	Based on alignments with YO annotation. Used in mansucript.
large-scale dataset (D. pseudoobscura female)	Dpse female head replicate 1 gene-level read counts based on HiSAT2 alignments and YO annotation	NCBI GEO; This paper	NCBI GEO GSE99574:GSM2647104_dpse_HD_f_r1.htseq_reverse.HiSAT2.YO.txt.gz	Based on alignments with YO annotation. Used in mansucript.
large-scale dataset (D. pseudoobscura female)	Dpse female head replicate 2 gene-level read counts based on HiSAT2 alignments and YO annotation	NCBI GEO; This paper	NCBI GEO GSE99574:GSM2647105_dpse_HD_f_r2.htseq_reverse.HiSAT2.YO.txt.gz	Based on alignments with YO annotation. Used in mansucript.
large-scale dataset (D. pseudoobscura female)	Dpse female head replicate 3 gene-level read counts based on HiSAT2 alignments and YO annotation	NCBI GEO; This paper	NCBI GEO GSE99574:GSM2647106_dpse_HD_f_r3.htseq_reverse.HiSAT2.YO.txt.gz	Based on alignments with YO annotation. Used in mansucript.
large-scale dataset (D. pseudoobscura female)	Dpse female head replicate 4 gene-level read counts based on HiSAT2 alignments and YO annotation	NCBI GEO; This paper	NCBI GEO GSE99574:GSM2817261_dpse_HD_f_r4.htseq_reverse.HiSAT2.YO.txt.gz	Based on alignments with YO annotation. Used in mansucript.
large-scale dataset (D. pseudoobscura female)	Dpse female reproductive tract replicate 1 gene-level read counts based on HiSAT2 alignments and YO annotation	NCBI GEO; This paper	NCBI GEO GSE99574:GSM2647110_dpse_RE_f_r1.htseq_reverse.HiSAT2.YO.txt.gz	Based on alignments with YO annotation. Used in mansucript.
large-scale dataset (D. pseudoobscura female)	Dpse female reproductive tract replicate 2 gene-level read counts based on HiSAT2 alignments and YO annotation	NCBI GEO; This paper	NCBI GEO GSE99574:GSM2647111_dpse_RE_f_r2.htseq_reverse.HiSAT2.YO.txt.gz	Based on alignments with YO annotation. Used in mansucript.
large-scale dataset (D. pseudoobscura female)	Dpse female reproductive tract replicate 3 gene-level read counts based on HiSAT2 alignments and YO annotation	NCBI GEO; This paper	NCBI GEO GSE99574:GSM2647112_dpse_RE_f_r3.htseq_reverse.HiSAT2.YO.txt.gz	Based on alignments with YO annotation. Used in mansucript.
large-scale dataset (D. pseudoobscura female)	Dpse female reproductive tract replicate 4 gene-level read counts based on HiSAT2 alignments and YO annotation	NCBI GEO; This paper	NCBI GEO GSE99574:GSM2817263_dpse_RE_f_r4.htseq_reverse.HiSAT2.YO.txt.gz	Based on alignments with YO annotation. Used in mansucript.
large-scale dataset (D. pseudoobscura female)	Dpse female thorax replicate 1 gene-level read counts based on HiSAT2 alignments and YO annotation	NCBI GEO; This paper	NCBI GEO GSE99574:GSM2647116_dpse_TX_f_r1.htseq_reverse.HiSAT2.YO.txt.gz	Based on alignments with YO annotation. Used in mansucript.
large-scale dataset (D. pseudoobscura female)	Dpse female thorax replicate 2 gene-level read counts based on HiSAT2 alignments and YO annotation	NCBI GEO; This paper	NCBI GEO GSE99574:GSM2647117_dpse_TX_f_r2.htseq_reverse.HiSAT2.YO.txt.gz	Based on alignments with YO annotation. Used in mansucript.
large-scale dataset (D. pseudoobscura female)	Dpse female thorax replicate 3 gene-level read counts based on HiSAT2 alignments and YO annotation	NCBI GEO; This paper	NCBI GEO GSE99574:GSM2647118_dpse_TX_f_r3.htseq_reverse.HiSAT2.YO.txt.gz	Based on alignments with YO annotation. Used in mansucript.
large-scale dataset (D. pseudoobscura female)	Dpse female thorax replicate 4 gene-level read counts based on HiSAT2 alignments and YO annotation	NCBI GEO; This paper	NCBI GEO GSE99574:GSM2817265_dpse_TX_f_r4.htseq_reverse.HiSAT2.YO.txt.gz	Based on alignments with YO annotation. Used in mansucript.
large-scale dataset (D. pseudoobscura female)	Dpse female whole organism replicate 1 gene-level read counts based on HiSAT2 alignments and YO annotation	NCBI GEO; This paper	NCBI GEO GSE99574:GSM2647122_dpse_WB_f_r1.htseq_reverse.HiSAT2.YO.txt.gz	Based on alignments with YO annotation. Used in mansucript.
large-scale dataset (D. pseudoobscura female)	Dpse female whole organism replicate 2 gene-level read counts based on HiSAT2 alignments and YO annotation	NCBI GEO; This paper	NCBI GEO GSE99574:GSM2647123_dpse_WB_f_r2.htseq_reverse.HiSAT2.YO.txt.gz	Based on alignments with YO annotation. Used in mansucript.
large-scale dataset (D. pseudoobscura female)	Dpse female whole organism replicate 3 gene-level read counts based on HiSAT2 alignments and YO annotation	NCBI GEO; This paper	NCBI GEO GSE99574:GSM2647124_dpse_WB_f_r3.htseq_reverse.HiSAT2.YO.txt.gz	Based on alignments with YO annotation. Used in mansucript.
large-scale dataset (D. pseudoobscura female)	Dpse female whole organism replicate 4 gene-level read counts based on HiSAT2 alignments and YO annotation	NCBI GEO; This paper	NCBI GEO GSE99574:GSM2817267_dpse_WB_f_r4.htseq_reverse.HiSAT2.YO.txt.gz	Based on alignments with YO annotation. Used in mansucript.
large-scale dataset (D. pseudoobscura female)	Dpse male abdomen replicate 1 gene-level read counts based on HiSAT2 alignments and YO annotation	NCBI GEO; This paper	NCBI GEO GSE99574:GSM2647089_dpse_AC_m_r1.htseq_reverse.HiSAT2.YO.txt.gz	Based on alignments with YO annotation. Used in mansucript.
large-scale dataset (D. pseudoobscura female)	Dpse male abdomen replicate 2 gene-level read counts based on HiSAT2 alignments and YO annotation	NCBI GEO; This paper	NCBI GEO GSE99574:GSM2647090_dpse_AC_m_r2.htseq_reverse.HiSAT2.YO.txt.gz	Based on alignments with YO annotation. Used in mansucript.
large-scale dataset (D. pseudoobscura female)	Dpse male abdomen replicate 3 gene-level read counts based on HiSAT2 alignments and YO annotation	NCBI GEO; This paper	NCBI GEO GSE99574:GSM2647091_dpse_AC_m_r3.htseq_reverse.HiSAT2.YO.txt.gz	Based on alignments with YO annotation. Used in mansucript.
large-scale dataset (D. pseudoobscura female)	Dpse male abdomen replicate 4 gene-level read counts based on HiSAT2 alignments and YO annotation	NCBI GEO; This paper	NCBI GEO GSE99574:GSM2817256_dpse_AC_m_r4.htseq_reverse.HiSAT2.YO.txt.gz	Based on alignments with YO annotation. Used in mansucript.
large-scale dataset (D. pseudoobscura female)	Dpse male viscera replicate 1 gene-level read counts based on HiSAT2 alignments and YO annotation	NCBI GEO; This paper	NCBI GEO GSE99574:GSM2647095_dpse_DG_m_r1.htseq_reverse.HiSAT2.YO.txt.gz	Based on alignments with YO annotation. Used in mansucript.
large-scale dataset (D. pseudoobscura male)	Dpse male viscera replicate 2 gene-level read counts based on HiSAT2 alignments and YO annotation	NCBI GEO; This paper	NCBI GEO GSE99574:GSM2647096_dpse_DG_m_r2.htseq_reverse.HiSAT2.YO.txt.gz	Based on alignments with YO annotation. Used in mansucript.
large-scale dataset (D. pseudoobscura male)	Dpse male viscera replicate 3 gene-level read counts based on HiSAT2 alignments and YO annotation	NCBI GEO; This paper	NCBI GEO GSE99574:GSM2647097_dpse_DG_m_r3.htseq_reverse.HiSAT2.YO.txt.gz	Based on alignments with YO annotation. Used in mansucript.
large-scale dataset (D. pseudoobscura male)	Dpse male viscera replicate 4 gene-level read counts based on HiSAT2 alignments and YO annotation	NCBI GEO; This paper	NCBI GEO GSE99574:GSM2817258_dpse_DG_m_r4.htseq_reverse.HiSAT2.YO.txt.gz	Based on alignments with YO annotation. Used in mansucript.
large-scale dataset (D. pseudoobscura male)	Dpse male gonad replicate 1 gene-level read counts based on HiSAT2 alignments and YO annotation	NCBI GEO; This paper	NCBI GEO GSE99574:GSM2647101_dpse_GO_m_r1.htseq_reverse.HiSAT2.YO.txt.gz	Based on alignments with YO annotation. Used in mansucript.
large-scale dataset (D. pseudoobscura male)	Dpse male gonad replicate 2 gene-level read counts based on HiSAT2 alignments and YO annotation	NCBI GEO; This paper	NCBI GEO GSE99574:GSM2647102_dpse_GO_m_r2.htseq_reverse.HiSAT2.YO.txt.gz	Based on alignments with YO annotation. Used in mansucript.
large-scale dataset (D. pseudoobscura male)	Dpse male gonad replicate 3 gene-level read counts based on HiSAT2 alignments and YO annotation	NCBI GEO; This paper	NCBI GEO GSE99574:GSM2647103_dpse_GO_m_r3.htseq_reverse.HiSAT2.YO.txt.gz	Based on alignments with YO annotation. Used in mansucript.
large-scale dataset (D. pseudoobscura male)	Dpse male gonad replicate 4 gene-level read counts based on HiSAT2 alignments and YO annotation	NCBI GEO; This paper	NCBI GEO GSE99574:GSM2817260_dpse_GO_m_r4.htseq_reverse.HiSAT2.YO.txt.gz	Based on alignments with YO annotation. Used in mansucript.
large-scale dataset (D. pseudoobscura male)	Dpse male head replicate 1 gene-level read counts based on HiSAT2 alignments and YO annotation	NCBI GEO; This paper	NCBI GEO GSE99574:GSM2647107_dpse_HD_m_r1.htseq_reverse.HiSAT2.YO.txt.gz	Based on alignments with YO annotation. Used in mansucript.
large-scale dataset (D. pseudoobscura male)	Dpse male head replicate 2 gene-level read counts based on HiSAT2 alignments and YO annotation	NCBI GEO; This paper	NCBI GEO GSE99574:GSM2647108_dpse_HD_m_r2.htseq_reverse.HiSAT2.YO.txt.gz	Based on alignments with YO annotation. Used in mansucript.
large-scale dataset (D. pseudoobscura male)	Dpse male head replicate 3 gene-level read counts based on HiSAT2 alignments and YO annotation	NCBI GEO; This paper	NCBI GEO GSE99574:GSM2647109_dpse_HD_m_r3.htseq_reverse.HiSAT2.YO.txt.gz	Based on alignments with YO annotation. Used in mansucript.
large-scale dataset (D. pseudoobscura male)	Dpse male head replicate 4 gene-level read counts based on HiSAT2 alignments and YO annotation	NCBI GEO; This paper	NCBI GEO GSE99574:GSM2817262_dpse_HD_m_r4.htseq_reverse.HiSAT2.YO.txt.gz	Based on alignments with YO annotation. Used in mansucript.
large-scale dataset (D. pseudoobscura male)	Dpse male reproductive tract replicate 1 gene-level read counts based on HiSAT2 alignments and YO annotation	NCBI GEO; This paper	NCBI GEO GSE99574:GSM2647113_dpse_RE_m_r1.htseq_reverse.HiSAT2.YO.txt.gz	Based on alignments with YO annotation. Used in mansucript.
large-scale dataset (D. pseudoobscura male)	Dpse male reproductive tract replicate 2 gene-level read counts based on HiSAT2 alignments and YO annotation	NCBI GEO; This paper	NCBI GEO GSE99574:GSM2647114_dpse_RE_m_r2.htseq_reverse.HiSAT2.YO.txt.gz	Based on alignments with YO annotation. Used in mansucript.
large-scale dataset (D. pseudoobscura male)	Dpse male reproductive tract replicate 3 gene-level read counts based on HiSAT2 alignments and YO annotation	NCBI GEO; This paper	NCBI GEO GSE99574:GSM2647115_dpse_RE_m_r3.htseq_reverse.HiSAT2.YO.txt.gz	Based on alignments with YO annotation. Used in mansucript.
large-scale dataset (D. pseudoobscura male)	Dpse male reproductive tract replicate 4 gene-level read counts based on HiSAT2 alignments and YO annotation	NCBI GEO; This paper	NCBI GEO GSE99574:GSM2817264_dpse_RE_m_r4.htseq_reverse.HiSAT2.YO.txt.gz	Based on alignments with YO annotation. Used in mansucript.
large-scale dataset (D. pseudoobscura male)	Dpse male thorax replicate 1 gene-level read counts based on HiSAT2 alignments and YO annotation	NCBI GEO; This paper	NCBI GEO GSE99574:GSM2647119_dpse_TX_m_r1.htseq_reverse.HiSAT2.YO.txt.gz	Based on alignments with YO annotation. Used in mansucript.
large-scale dataset (D. pseudoobscura male)	Dpse male thorax replicate 2 gene-level read counts based on HiSAT2 alignments and YO annotation	NCBI GEO; This paper	NCBI GEO GSE99574:GSM2647120_dpse_TX_m_r2.htseq_reverse.HiSAT2.YO.txt.gz	Based on alignments with YO annotation. Used in mansucript.
large-scale dataset (D. pseudoobscura male)	Dpse male thorax replicate 3 gene-level read counts based on HiSAT2 alignments and YO annotation	NCBI GEO; This paper	NCBI GEO GSE99574:GSM2647121_dpse_TX_m_r3.htseq_reverse.HiSAT2.YO.txt.gz	Based on alignments with YO annotation. Used in mansucript.
large-scale dataset (D. pseudoobscura male)	Dpse male thorax replicate 4 gene-level read counts based on HiSAT2 alignments and YO annotation	NCBI GEO; This paper	NCBI GEO GSE99574:GSM2817266_dpse_TX_m_r4.htseq_reverse.HiSAT2.YO.txt.gz	Based on alignments with YO annotation. Used in mansucript.
large-scale dataset (D. pseudoobscura male)	Dpse male whole organism replicate 1 gene-level read counts based on HiSAT2 alignments and YO annotation	NCBI GEO; This paper	NCBI GEO GSE99574:GSM2647125_dpse_WB_m_r1.htseq_reverse.HiSAT2.YO.txt.gz	Based on alignments with YO annotation. Used in mansucript.
large-scale dataset (D. pseudoobscura male)	Dpse male whole organism replicate 2 gene-level read counts based on HiSAT2 alignments and YO annotation	NCBI GEO; This paper	NCBI GEO GSE99574:GSM2647126_dpse_WB_m_r2.htseq_reverse.HiSAT2.YO.txt.gz	Based on alignments with YO annotation. Used in mansucript.
large-scale dataset (D. pseudoobscura male)	Dpse male whole organism replicate 3 gene-level read counts based on HiSAT2 alignments and YO annotation	NCBI GEO; This paper	NCBI GEO GSE99574:GSM2647127_dpse_WB_m_r3.htseq_reverse.HiSAT2.YO.txt.gz	Based on alignments with YO annotation. Used in mansucript.
large-scale dataset (D. pseudoobscura male)	Dpse male whole organism replicate 4 gene-level read counts based on HiSAT2 alignments and YO annotation	NCBI GEO; This paper	NCBI GEO GSE99574:GSM2817268_dpse_WB_m_r4.htseq_reverse.HiSAT2.YO.txt.gz	Based on alignments with YO annotation. Used in mansucript.
large-scale dataset (D. pseudoobscura male)	Dvir female abdomen replicate 1 gene-level read counts based on HiSAT2 alignments and YO annotation	NCBI GEO; This paper	NCBI GEO GSE99574:GSM2647128_dvir_AC_f_r1.htseq_reverse.HiSAT2.YO.txt.gz	Based on alignments with YO annotation. Used in mansucript.
large-scale dataset (D. pseudoobscura male)	Dvir female abdomen replicate 2 gene-level read counts based on HiSAT2 alignments and YO annotation	NCBI GEO; This paper	NCBI GEO GSE99574:GSM2647129_dvir_AC_f_r2.htseq_reverse.HiSAT2.YO.txt.gz	Based on alignments with YO annotation. Used in mansucript.
large-scale dataset (D. pseudoobscura male)	Dvir female abdomen replicate 3 gene-level read counts based on HiSAT2 alignments and YO annotation	NCBI GEO; This paper	NCBI GEO GSE99574:GSM2647130_dvir_AC_f_r3.htseq_reverse.HiSAT2.YO.txt.gz	Based on alignments with YO annotation. Used in mansucript.
large-scale dataset (D. pseudoobscura male)	Dvir female abdomen replicate 4 gene-level read counts based on HiSAT2 alignments and YO annotation	NCBI GEO; This paper	NCBI GEO GSE99574:GSM2817269_dvir_AC_f_r4.htseq_reverse.HiSAT2.YO.txt.gz	Based on alignments with YO annotation. Used in mansucript.
large-scale dataset (D. pseudoobscura male)	Dvir female viscera replicate 1 gene-level read counts based on HiSAT2 alignments and YO annotation	NCBI GEO; This paper	NCBI GEO GSE99574:GSM2647134_dvir_DG_f_r1.htseq_reverse.HiSAT2.YO.txt.gz	Based on alignments with YO annotation. Used in mansucript.
large-scale dataset (D. virilis female)	Dvir female viscera replicate 2 gene-level read counts based on HiSAT2 alignments and YO annotation	NCBI GEO; This paper	NCBI GEO GSE99574:GSM2647135_dvir_DG_f_r2.htseq_reverse.HiSAT2.YO.txt.gz	Based on alignments with YO annotation. Used in mansucript.
large-scale dataset (D. virilis female)	Dvir female viscera replicate 3 gene-level read counts based on HiSAT2 alignments and YO annotation	NCBI GEO; This paper	NCBI GEO GSE99574:GSM2647136_dvir_DG_f_r3.htseq_reverse.HiSAT2.YO.txt.gz	Based on alignments with YO annotation. Used in mansucript.
large-scale dataset (D. virilis female)	Dvir female viscera replicate 4 gene-level read counts based on HiSAT2 alignments and YO annotation	NCBI GEO; This paper	NCBI GEO GSE99574:GSM2817271_dvir_DG_f_r4.htseq_reverse.HiSAT2.YO.txt.gz	Based on alignments with YO annotation. Used in mansucript.
large-scale dataset (D. virilis female)	Dvir female gonad replicate 1 gene-level read counts based on HiSAT2 alignments and YO annotation	NCBI GEO; This paper	NCBI GEO GSE99574:GSM2647140_dvir_GO_f_r1.htseq_reverse.HiSAT2.YO.txt.gz	Based on alignments with YO annotation. Used in mansucript.
large-scale dataset (D. virilis female)	Dvir female gonad replicate 2 gene-level read counts based on HiSAT2 alignments and YO annotation	NCBI GEO; This paper	NCBI GEO GSE99574:GSM2647141_dvir_GO_f_r2.htseq_reverse.HiSAT2.YO.txt.gz	Based on alignments with YO annotation. Used in mansucript.
large-scale dataset (D. virilis female)	Dvir female gonad replicate 3 gene-level read counts based on HiSAT2 alignments and YO annotation	NCBI GEO; This paper	NCBI GEO GSE99574:GSM2647142_dvir_GO_f_r3.htseq_reverse.HiSAT2.YO.txt.gz	Based on alignments with YO annotation. Used in mansucript.
large-scale dataset (D. virilis female)	Dvir female gonad replicate 4 gene-level read counts based on HiSAT2 alignments and YO annotation	NCBI GEO; This paper	NCBI GEO GSE99574:GSM2817273_dvir_GO_f_r4.htseq_reverse.HiSAT2.YO.txt.gz	Based on alignments with YO annotation. Used in mansucript.
large-scale dataset (D. virilis female)	Dvir female head replicate 1 gene-level read counts based on HiSAT2 alignments and YO annotation	NCBI GEO; This paper	NCBI GEO GSE99574:GSM2647146_dvir_HD_f_r1.htseq_reverse.HiSAT2.YO.txt.gz	Based on alignments with YO annotation. Used in mansucript.
large-scale dataset (D. virilis female)	Dvir female head replicate 2 gene-level read counts based on HiSAT2 alignments and YO annotation	NCBI GEO; This paper	NCBI GEO GSE99574:GSM2647147_dvir_HD_f_r2.htseq_reverse.HiSAT2.YO.txt.gz	Based on alignments with YO annotation. Used in mansucript.
large-scale dataset (D. virilis female)	Dvir female head replicate 3 gene-level read counts based on HiSAT2 alignments and YO annotation	NCBI GEO; This paper	NCBI GEO GSE99574:GSM2647148_dvir_HD_f_r3.htseq_reverse.HiSAT2.YO.txt.gz	Based on alignments with YO annotation. Used in mansucript.
large-scale dataset (D. virilis female)	Dvir female head replicate 4 gene-level read counts based on HiSAT2 alignments and YO annotation	NCBI GEO; This paper	NCBI GEO GSE99574:GSM2817275_dvir_HD_f_r4.htseq_reverse.HiSAT2.YO.txt.gz	Based on alignments with YO annotation. Used in mansucript.
large-scale dataset (D. virilis female)	Dvir female reproductive tract replicate 1 gene-level read counts based on HiSAT2 alignments and YO annotation	NCBI GEO; This paper	NCBI GEO GSE99574:GSM2647152_dvir_RE_f_r1.htseq_reverse.HiSAT2.YO.txt.gz	Based on alignments with YO annotation. Used in mansucript.
large-scale dataset (D. virilis female)	Dvir female reproductive tract replicate 2 gene-level read counts based on HiSAT2 alignments and YO annotation	NCBI GEO; This paper	NCBI GEO GSE99574:GSM2647153_dvir_RE_f_r2.htseq_reverse.HiSAT2.YO.txt.gz	Based on alignments with YO annotation. Used in mansucript.
large-scale dataset (D. virilis female)	Dvir female reproductive tract replicate 3 gene-level read counts based on HiSAT2 alignments and YO annotation	NCBI GEO; This paper	NCBI GEO GSE99574:GSM2647154_dvir_RE_f_r3.htseq_reverse.HiSAT2.YO.txt.gz	Based on alignments with YO annotation. Used in mansucript.
large-scale dataset (D. virilis female)	Dvir female reproductive tract replicate 4 gene-level read counts based on HiSAT2 alignments and YO annotation	NCBI GEO; This paper	NCBI GEO GSE99574:GSM2817277_dvir_RE_f_r4.htseq_reverse.HiSAT2.YO.txt.gz	Based on alignments with YO annotation. Used in mansucript.
large-scale dataset (D. virilis female)	Dvir female thorax replicate 1 gene-level read counts based on HiSAT2 alignments and YO annotation	NCBI GEO; This paper	NCBI GEO GSE99574:GSM2647158_dvir_TX_f_r1.htseq_reverse.HiSAT2.YO.txt.gz	Based on alignments with YO annotation. Used in mansucript.
large-scale dataset (D. virilis female)	Dvir female thorax replicate 2 gene-level read counts based on HiSAT2 alignments and YO annotation	NCBI GEO; This paper	NCBI GEO GSE99574:GSM2647159_dvir_TX_f_r2.htseq_reverse.HiSAT2.YO.txt.gz	Based on alignments with YO annotation. Used in mansucript.
large-scale dataset (D. virilis female)	Dvir female thorax replicate 3 gene-level read counts based on HiSAT2 alignments and YO annotation	NCBI GEO; This paper	NCBI GEO GSE99574:GSM2647160_dvir_TX_f_r3.htseq_reverse.HiSAT2.YO.txt.gz	Based on alignments with YO annotation. Used in mansucript.
large-scale dataset (D. virilis female)	Dvir female thorax replicate 4 gene-level read counts based on HiSAT2 alignments and YO annotation	NCBI GEO; This paper	NCBI GEO GSE99574:GSM2817279_dvir_TX_f_r4.htseq_reverse.HiSAT2.YO.txt.gz	Based on alignments with YO annotation. Used in mansucript.
large-scale dataset (D. virilis female)	Dvir female whole organism replicate 1 gene-level read counts based on HiSAT2 alignments and YO annotation	NCBI GEO; This paper	NCBI GEO GSE99574:GSM2647164_dvir_WB_f_r1.htseq_reverse.HiSAT2.YO.txt.gz	Based on alignments with YO annotation. Used in mansucript.
large-scale dataset (D. virilis female)	Dvir female whole organism replicate 2 gene-level read counts based on HiSAT2 alignments and YO annotation	NCBI GEO; This paper	NCBI GEO GSE99574:GSM2647165_dvir_WB_f_r2.htseq_reverse.HiSAT2.YO.txt.gz	Based on alignments with YO annotation. Used in mansucript.
large-scale dataset (D. virilis female)	Dvir female whole organism replicate 3 gene-level read counts based on HiSAT2 alignments and YO annotation	NCBI GEO; This paper	NCBI GEO GSE99574:GSM2647166_dvir_WB_f_r3.htseq_reverse.HiSAT2.YO.txt.gz	Based on alignments with YO annotation. Used in mansucript.
large-scale dataset (D. virilis female)	Dvir female whole organism replicate 4 gene-level read counts based on HiSAT2 alignments and YO annotation	NCBI GEO; This paper	NCBI GEO GSE99574:GSM2817281_dvir_WB_f_r4.htseq_reverse.HiSAT2.YO.txt.gz	Based on alignments with YO annotation. Used in mansucript.
large-scale dataset (D. virilis female)	Dvir male abdomen replicate 1 gene-level read counts based on HiSAT2 alignments and YO annotation	NCBI GEO; This paper	NCBI GEO GSE99574:GSM2647131_dvir_AC_m_r1.htseq_reverse.HiSAT2.YO.txt.gz	Based on alignments with YO annotation. Used in mansucript.
large-scale dataset (D. virilis female)	Dvir male abdomen replicate 2 gene-level read counts based on HiSAT2 alignments and YO annotation	NCBI GEO; This paper	NCBI GEO GSE99574:GSM2647132_dvir_AC_m_r2.htseq_reverse.HiSAT2.YO.txt.gz	Based on alignments with YO annotation. Used in mansucript.
large-scale dataset (D. virilis female)	Dvir male abdomen replicate 3 gene-level read counts based on HiSAT2 alignments and YO annotation	NCBI GEO; This paper	NCBI GEO GSE99574:GSM2647133_dvir_AC_m_r3.htseq_reverse.HiSAT2.YO.txt.gz	Based on alignments with YO annotation. Used in mansucript.
large-scale dataset (D. virilis female)	Dvir male abdomen replicate 4 gene-level read counts based on HiSAT2 alignments and YO annotation	NCBI GEO; This paper	NCBI GEO GSE99574:GSM2817270_dvir_AC_m_r4.htseq_reverse.HiSAT2.YO.txt.gz	Based on alignments with YO annotation. Used in mansucript.
large-scale dataset (D. virilis female)	Dvir male viscera replicate 1 gene-level read counts based on HiSAT2 alignments and YO annotation	NCBI GEO; This paper	NCBI GEO GSE99574:GSM2647137_dvir_DG_m_r1.htseq_reverse.HiSAT2.YO.txt.gz	Based on alignments with YO annotation. Used in mansucript.
large-scale dataset (D. virilis female)	Dvir male viscera replicate 2 gene-level read counts based on HiSAT2 alignments and YO annotation	NCBI GEO; This paper	NCBI GEO GSE99574:GSM2647138_dvir_DG_m_r2.htseq_reverse.HiSAT2.YO.txt.gz	Based on alignments with YO annotation. Used in mansucript.
large-scale dataset (D. virilis male)	Dvir male viscera replicate 3 gene-level read counts based on HiSAT2 alignments and YO annotation	NCBI GEO; This paper	NCBI GEO GSE99574:GSM2647139_dvir_DG_m_r3.htseq_reverse.HiSAT2.YO.txt.gz	Based on alignments with YO annotation. Used in mansucript.
large-scale dataset (D. virilis male)	Dvir male viscera replicate 4 gene-level read counts based on HiSAT2 alignments and YO annotation	NCBI GEO; This paper	NCBI GEO GSE99574:GSM2817272_dvir_DG_m_r4.htseq_reverse.HiSAT2.YO.txt.gz	Based on alignments with YO annotation. Used in mansucript.
large-scale dataset (D. virilis male)	Dvir male gonad replicate 1 gene-level read counts based on HiSAT2 alignments and YO annotation	NCBI GEO; This paper	NCBI GEO GSE99574:GSM2647143_dvir_GO_m_r1.htseq_reverse.HiSAT2.YO.txt.gz	Based on alignments with YO annotation. Used in mansucript.
large-scale dataset (D. virilis male)	Dvir male gonad replicate 2 gene-level read counts based on HiSAT2 alignments and YO annotation	NCBI GEO; This paper	NCBI GEO GSE99574:GSM2647144_dvir_GO_m_r2.htseq_reverse.HiSAT2.YO.txt.gz	Based on alignments with YO annotation. Used in mansucript.
large-scale dataset (D. virilis male)	Dvir male gonad replicate 3 gene-level read counts based on HiSAT2 alignments and YO annotation	NCBI GEO; This paper	NCBI GEO GSE99574:GSM2647145_dvir_GO_m_r3.htseq_reverse.HiSAT2.YO.txt.gz	Based on alignments with YO annotation. Used in mansucript.
large-scale dataset (D. virilis male)	Dvir male gonad replicate 4 gene-level read counts based on HiSAT2 alignments and YO annotation	NCBI GEO; This paper	NCBI GEO GSE99574:GSM2817274_dvir_GO_m_r4.htseq_reverse.HiSAT2.YO.txt.gz	Based on alignments with YO annotation. Used in mansucript.
large-scale dataset (D. virilis male)	Dvir male head replicate 1 gene-level read counts based on HiSAT2 alignments and YO annotation	NCBI GEO; This paper	NCBI GEO GSE99574:GSM2647149_dvir_HD_m_r1.htseq_reverse.HiSAT2.YO.txt.gz	Based on alignments with YO annotation. Used in mansucript.
large-scale dataset (D. virilis male)	Dvir male head replicate 2 gene-level read counts based on HiSAT2 alignments and YO annotation	NCBI GEO; This paper	NCBI GEO GSE99574:GSM2647150_dvir_HD_m_r2.htseq_reverse.HiSAT2.YO.txt.gz	Based on alignments with YO annotation. Used in mansucript.
large-scale dataset (D. virilis male)	Dvir male head replicate 3 gene-level read counts based on HiSAT2 alignments and YO annotation	NCBI GEO; This paper	NCBI GEO GSE99574:GSM2647151_dvir_HD_m_r3.htseq_reverse.HiSAT2.YO.txt.gz	Based on alignments with YO annotation. Used in mansucript.
large-scale dataset (D. virilis male)	Dvir male head replicate 4 gene-level read counts based on HiSAT2 alignments and YO annotation	NCBI GEO; This paper	NCBI GEO GSE99574:GSM2817276_dvir_HD_m_r4.htseq_reverse.HiSAT2.YO.txt.gz	Based on alignments with YO annotation. Used in mansucript.
large-scale dataset (D. virilis male)	Dvir male reproductive tract replicate 1 gene-level read counts based on HiSAT2 alignments and YO annotation	NCBI GEO; This paper	NCBI GEO GSE99574:GSM2647155_dvir_RE_m_r1.htseq_reverse.HiSAT2.YO.txt.gz	Based on alignments with YO annotation. Used in mansucript.
large-scale dataset (D. virilis male)	Dvir male reproductive tract replicate 2 gene-level read counts based on HiSAT2 alignments and YO annotation	NCBI GEO; This paper	NCBI GEO GSE99574:GSM2647156_dvir_RE_m_r2.htseq_reverse.HiSAT2.YO.txt.gz	Based on alignments with YO annotation. Used in mansucript.
large-scale dataset (D. virilis male)	Dvir male reproductive tract replicate 3 gene-level read counts based on HiSAT2 alignments and YO annotation	NCBI GEO; This paper	NCBI GEO GSE99574:GSM2647157_dvir_RE_m_r3.htseq_reverse.HiSAT2.YO.txt.gz	Based on alignments with YO annotation. Used in mansucript.
large-scale dataset (D. virilis male)	Dvir male reproductive tract replicate 4 gene-level read counts based on HiSAT2 alignments and YO annotation	NCBI GEO; This paper	NCBI GEO GSE99574:GSM2817278_dvir_RE_m_r4.htseq_reverse.HiSAT2.YO.txt.gz	Based on alignments with YO annotation. Used in mansucript.
large-scale dataset (D. virilis male)	Dvir male thorax replicate 1 gene-level read counts based on HiSAT2 alignments and YO annotation	NCBI GEO; This paper	NCBI GEO GSE99574:GSM2647161_dvir_TX_m_r1.htseq_reverse.HiSAT2.YO.txt.gz	Based on alignments with YO annotation. Used in mansucript.
large-scale dataset (D. virilis male)	Dvir male thorax replicate 2 gene-level read counts based on HiSAT2 alignments and YO annotation	NCBI GEO; This paper	NCBI GEO GSE99574:GSM2647162_dvir_TX_m_r2.htseq_reverse.HiSAT2.YO.txt.gz	Based on alignments with YO annotation. Used in mansucript.
large-scale dataset (D. virilis male)	Dvir male thorax replicate 3 gene-level read counts based on HiSAT2 alignments and YO annotation	NCBI GEO; This paper	NCBI GEO GSE99574:GSM2647163_dvir_TX_m_r3.htseq_reverse.HiSAT2.YO.txt.gz	Based on alignments with YO annotation. Used in mansucript.
large-scale dataset (D. virilis male)	Dvir male thorax replicate 4 gene-level read counts based on HiSAT2 alignments and YO annotation	NCBI GEO; This paper	NCBI GEO GSE99574:GSM2817280_dvir_TX_m_r4.htseq_reverse.HiSAT2.YO.txt.gz	Based on alignments with YO annotation. Used in mansucript.
[truncated: 1,512 more rows]
